# Supplementary material
Source: PubMed Central journal article supplement (PMC10152310)
Supplement: mmc1.pdf [file mmc1.pdf]

# THE LANCET

## Infectious Diseases

### Supplementary appendix

This appendix formed part of the original submission and has been peer reviewed. We post it as supplied by the authors.

Supplement to: Bobrovitz N, Ware H, Ma X, et al. Protective effectiveness of previous SARS-CoV-2 infection and hybrid immunity against the omicron variant and severe disease: a systematic review and meta-regression. *Lancet Infect Dis* 2023; published online Jan 18. [https://doi.org/10.1016/S1473-3099\(22\)00801-5](https://doi.org/10.1016/S1473-3099(22)00801-5).

# Appendices

|    |                                                                                                                      |    |
|----|----------------------------------------------------------------------------------------------------------------------|----|
| 1  |                                                                                                                      |    |
| 2  |                                                                                                                      |    |
| 3  | Appendix 1. PRISMA checklist                                                                                         | 2  |
| 4  | Appendix 2. Search strategy                                                                                          | 5  |
| 5  | Appendix 3. Additional methodological details                                                                        | 10 |
| 6  | Appendix 4. Detailed list of comparisons with corresponding effect measures and epidemiological and policy           |    |
| 7  | questions                                                                                                            | 13 |
| 8  | Appendix 5. Characteristics and results of individual prior infection studies included in meta-analysis              | 14 |
| 9  | Appendix 6. Characteristics and results of individual hybrid immunity studies included in meta-analysis              | 18 |
| 10 | Appendix 7. Risk of bias assessments                                                                                 | 38 |
| 11 | Appendix 8. Summary of results for studies reporting sub-group data by age                                           | 43 |
| 12 | Appendix 9. Sub-group analysis of the protective effectiveness of hybrid immunity by vaccine type                    | 45 |
| 13 | Appendix 10. Sub-group analysis of the protective effectiveness of prior infection and hybrid immunity by prior      |    |
| 14 | infection variant                                                                                                    | 46 |
| 15 | Appendix 11. Sensitivity analysis of the protection conferred by prior infection and hybrid immunity compared to     |    |
| 16 | immune naïve for studies at different risk of bias                                                                   | 47 |
| 17 | Appendix 12. Sensitivity analysis of protection conferred by prior infection or hybrid immunity over time using the  |    |
| 18 | WHO definition of severe disease                                                                                     | 49 |
| 19 | Appendix 13. Sensitivity analysis of the protection against reinfection and severe disease conferred by the primary- |    |
| 20 | series vaccine, first booster vaccine, prior infection, and hybrid immunity compared to immune naïve                 | 50 |
| 21 | Appendix 14. Definitions of severe disease in included studies                                                       | 51 |
| 22 | Appendix 15. Six-month protection against reinfection and severe disease conferred by the primary-series vaccine,    |    |
| 23 | first booster vaccine, prior infection, and hybrid immunity compared to immune naïve individuals                     | 52 |
| 24 | Appendix 16. Characteristics of vaccine effectiveness studies                                                        | 53 |
| 25 | Appendix 17. References for the supplement                                                                           | 54 |
| 26 |                                                                                                                      |    |
| 27 |                                                                                                                      |    |
| 28 |                                                                                                                      |    |
| 29 |                                                                                                                      |    |
| 30 |                                                                                                                      |    |
| 31 |                                                                                                                      |    |

## 32 Appendix 1. PRISMA checklist

| Section and Topic             | Item # | Checklist item                                                                                                                                                                                                                                                                                       | Location where item is reported |
|-------------------------------|--------|------------------------------------------------------------------------------------------------------------------------------------------------------------------------------------------------------------------------------------------------------------------------------------------------------|---------------------------------|
| <b>TITLE</b>                  |        |                                                                                                                                                                                                                                                                                                      |                                 |
| Title                         | 1      | Identify the report as a systematic review.                                                                                                                                                                                                                                                          | Page 1                          |
| <b>ABSTRACT</b>               |        |                                                                                                                                                                                                                                                                                                      |                                 |
| Abstract                      | 2      | See the PRISMA 2020 for Abstracts checklist.                                                                                                                                                                                                                                                         | Page 2                          |
| <b>INTRODUCTION</b>           |        |                                                                                                                                                                                                                                                                                                      |                                 |
| Rationale                     | 3      | Describe the rationale for the review in the context of existing knowledge.                                                                                                                                                                                                                          | Page 5, 6                       |
| Objectives                    | 4      | Provide an explicit statement of the objective(s) or question(s) the review addresses.                                                                                                                                                                                                               | Page 2-4                        |
| <b>METHODS</b>                |        |                                                                                                                                                                                                                                                                                                      |                                 |
| Eligibility criteria          | 5      | Specify the inclusion and exclusion criteria for the review and how studies were grouped for the syntheses.                                                                                                                                                                                          | Page 6, Appendix 3              |
| Information sources           | 6      | Specify all databases, registers, websites, organisations, reference lists and other sources searched or consulted to identify studies. Specify the date when each source was last searched or consulted.                                                                                            | Page 5,6                        |
| Search strategy               | 7      | Present the full search strategies for all databases, registers and websites, including any filters and limits used.                                                                                                                                                                                 | Page 5,6, Appendix 2            |
| Selection process             | 8      | Specify the methods used to decide whether a study met the inclusion criteria of the review, including how many reviewers screened each record and each report retrieved, whether they worked independently, and if applicable, details of automation tools used in the process.                     | Page 7                          |
| Data collection process       | 9      | Specify the methods used to collect data from reports, including how many reviewers collected data from each report, whether they worked independently, any processes for obtaining or confirming data from study investigators, and if applicable, details of automation tools used in the process. | Page 6, 7                       |
| Data items                    | 10a    | List and define all outcomes for which data were sought. Specify whether all results that were compatible with each outcome domain in each study were sought (e.g. for all measures, time points, analyses), and if not, the methods used to decide which results to collect.                        | Page 6,7, Appendix 3            |
|                               | 10b    | List and define all other variables for which data were sought (e.g. participant and intervention characteristics, funding sources). Describe any assumptions made about any missing or unclear information.                                                                                         | Page 6,7, Appendix 3            |
| Study risk of bias assessment | 11     | Specify the methods used to assess risk of bias in the included studies, including details of the tool(s) used, how many reviewers assessed each study and whether they worked independently, and if applicable, details of automation tools used in the process.                                    | Page 7                          |

|                               |     |                                                                                                                                                                                                                                                                                      |                                                                             |
|-------------------------------|-----|--------------------------------------------------------------------------------------------------------------------------------------------------------------------------------------------------------------------------------------------------------------------------------------|-----------------------------------------------------------------------------|
| Effect measures               | 12  | Specify for each outcome the effect measure(s) (e.g. risk ratio, mean difference) used in the synthesis or presentation of results.                                                                                                                                                  | Page 6-8<br>Appendix 3, 4                                                   |
| Synthesis methods             | 13a | Describe the processes used to decide which studies were eligible for each synthesis (e.g. tabulating the study intervention characteristics and comparing against the planned groups for each synthesis (item #5)).                                                                 | Page 6-8<br>Appendix 3                                                      |
|                               | 13b | Describe any methods required to prepare the data for presentation or synthesis, such as handling of missing summary statistics, or data conversions.                                                                                                                                | Page 6-8<br>Appendix 3                                                      |
|                               | 13c | Describe any methods used to tabulate or visually display results of individual studies and syntheses.                                                                                                                                                                               | Page 6-8<br>Appendix 3                                                      |
|                               | 13d | Describe any methods used to synthesize results and provide a rationale for the choice(s). If meta-analysis was performed, describe the model(s), method(s) to identify the presence and extent of statistical heterogeneity, and software package(s) used.                          | Page 6-8<br>Appendix 3, 4                                                   |
|                               | 13e | Describe any methods used to explore possible causes of heterogeneity among study results (e.g. subgroup analysis, meta-regression).                                                                                                                                                 | Page 8,<br>Appendix 3                                                       |
|                               | 13f | Describe any sensitivity analyses conducted to assess robustness of the synthesized results.                                                                                                                                                                                         | Page 8,<br>Appendix 3                                                       |
| Reporting bias assessment     | 14  | Describe any methods used to assess risk of bias due to missing results in a synthesis (arising from reporting biases).                                                                                                                                                              | N/A                                                                         |
| Certainty assessment          | 15  | Describe any methods used to assess certainty (or confidence) in the body of evidence for an outcome.                                                                                                                                                                                | N/A                                                                         |
| <b>RESULTS</b>                |     |                                                                                                                                                                                                                                                                                      |                                                                             |
| Study selection               | 16a | Describe the results of the search and selection process, from the number of records identified in the search to the number of studies included in the review, ideally using a flow diagram.                                                                                         | Page 8, Figure 1                                                            |
|                               | 16b | Cite studies that might appear to meet the inclusion criteria, but which were excluded, and explain why they were excluded.                                                                                                                                                          | Figure 1                                                                    |
| Study characteristics         | 17  | Cite each included study and present its characteristics.                                                                                                                                                                                                                            | Page 8,9, Table 1, Appendix 5, 6                                            |
| Risk of bias in studies       | 18  | Present assessments of risk of bias for each included study.                                                                                                                                                                                                                         | Appendix 7                                                                  |
| Results of individual studies | 19  | For all outcomes, present, for each study: (a) summary statistics for each group (where appropriate) and (b) an effect estimate and its precision (e.g. confidence/credible interval), ideally using structured tables or plots.                                                     | Appendix 5, 6                                                               |
| Results of syntheses          | 20a | For each synthesis, briefly summarise the characteristics and risk of bias among contributing studies.                                                                                                                                                                               | Page 8-11,<br>Table 1                                                       |
|                               | 20b | Present results of all statistical syntheses conducted. If meta-analysis was done, present for each the summary estimate and its precision (e.g. confidence/credible interval) and measures of statistical heterogeneity. If comparing groups, describe the direction of the effect. | Page 8-11,<br>Table 2, Table 3, Figure 2, Figure 3,<br>Appendix 8, 9, 12-14 |

|                                                |     |                                                                                                                                                                                                                                            |                                 |
|------------------------------------------------|-----|--------------------------------------------------------------------------------------------------------------------------------------------------------------------------------------------------------------------------------------------|---------------------------------|
|                                                | 20c | Present results of all investigations of possible causes of heterogeneity among study results.                                                                                                                                             | Page 8-11, Appendix 8, 9, 12-14 |
|                                                | 20d | Present results of all sensitivity analyses conducted to assess the robustness of the synthesized results.                                                                                                                                 | Page 8-11, Appendix 8, 9, 12-14 |
| Reporting biases                               | 21  | Present assessments of risk of bias due to missing results (arising from reporting biases) for each synthesis assessed.                                                                                                                    | N/A                             |
| Certainty of evidence                          | 22  | Present assessments of certainty (or confidence) in the body of evidence for each outcome assessed.                                                                                                                                        | N/A                             |
| <b>DISCUSSION</b>                              |     |                                                                                                                                                                                                                                            |                                 |
| Discussion                                     | 23a | Provide a general interpretation of the results in the context of other evidence.                                                                                                                                                          | Page 12                         |
|                                                | 23b | Discuss any limitations of the evidence included in the review.                                                                                                                                                                            | Page 13, 14                     |
|                                                | 23c | Discuss any limitations of the review processes used.                                                                                                                                                                                      | Page 13, 14                     |
|                                                | 23d | Discuss implications of the results for practice, policy, and future research.                                                                                                                                                             | Page 12-14                      |
| <b>OTHER INFORMATION</b>                       |     |                                                                                                                                                                                                                                            |                                 |
| Registration and protocol                      | 24a | Provide registration information for the review, including register name and registration number, or state that the review was not registered.                                                                                             | Page 5                          |
|                                                | 24b | Indicate where the review protocol can be accessed, or state that a protocol was not prepared.                                                                                                                                             | Page 5                          |
|                                                | 24c | Describe and explain any amendments to information provided at registration or in the protocol.                                                                                                                                            | Appendix 3                      |
| Support                                        | 25  | Describe sources of financial or non-financial support for the review, and the role of the funders or sponsors in the review.                                                                                                              | Page 2, 8                       |
| Competing interests                            | 26  | Declare any competing interests of review authors.                                                                                                                                                                                         | Page 15                         |
| Availability of data, code and other materials | 27  | Report which of the following are publicly available and where they can be found: template data collection forms; data extracted from included studies; data used for all analyses; analytic code; any other materials used in the review. | Page 15                         |

33  
34  
35  
36

37 **Appendix 2. Search strategy**

38 **Additional details of search strategies**

39 The search strategy comprised three search keyword concepts: SARS-CoV-2, reinfection/protective effectiveness,  
40 and previous infection/presence of antibodies/hybrid immunity.

41  
42 Comprehensive search strategies were designed by a medical librarian, for each database, incorporating both subject  
43 headings and keywords based on the individual database's unique thesaurus and available operators. The SARS-  
44 COV-2 search concept was adapted from the CADTH Covid-19 search string.<sup>1</sup> The search strategy was validated  
45 against known included articles from previously published reviews.

46  
47 Results from the searches were exported on June 1st, 2022, as RIS and imported into Covidence software  
48 (www.covidence.org) for deduplication. Articles reporting identical information to previously included articles were  
49 excluded as duplicates. This rule extended to pre-print articles that were subsequently published in peer-reviewed  
50 journals. In these cases, the peer-reviewed articles were considered the definitive version.

51  
52 We searched databases from 1 January 2020 to 1 June 2022. Pre-print articles that were identified during this period  
53 and subsequently updated or published as peer-review articles between 1 June 2022 and 15 July 2022 were also  
54 included.

55  
56 **Search strategies used for electronic databases**

57 MEDLINE(R) ALL <Ovid; 2020 to June 01, 2022>

| #  | Query                                                                                                                                                                                                                                                        | Results |
|----|--------------------------------------------------------------------------------------------------------------------------------------------------------------------------------------------------------------------------------------------------------------|---------|
| 1  | COVID-19/ or exp COVID-19 Testing/ or COVID-19 Vaccines/ or SARS-CoV-2/                                                                                                                                                                                      | 166,472 |
| 2  | (coronavirus/ or betacoronavirus/ or coronavirus infections/) and (disease outbreaks/ or epidemics/ or pandemics/)                                                                                                                                           | 40,140  |
| 3  | (nCoV* or 2019nCoV or 19nCoV or COVID19* or COVID or SARS-COV-2 or SARSCOV-2 or SARS-COV2 or SARSCOV2 or SARS coronavirus 2 or Severe Acute Respiratory Syndrome Coronavirus 2 or Severe Acute Respiratory Syndrome Corona Virus 2).ti,ab,kf,nm,ot,ox,rx,px. | 252,595 |
| 4  | ((new or novel or "19" or "2019" or Wuhan or Hubei or China or Chinese) adj3 (coronavirus* or corona virus* or betacoronavirus* or CoV or HCoV)).ti,ab,kf,ot.                                                                                                | 70,526  |
| 5  | (longCOVID* or postCOVID* or postcoronavirus* or postSARS*).ti,ab,kf,ot.                                                                                                                                                                                     | 40      |
| 6  | ((coronavirus* or corona virus* or betacoronavirus*) adj3 (pandemic* or epidemic* or outbreak* or crisis)).ti,ab,kf,ot.                                                                                                                                      | 12,534  |
| 7  | ((Wuhan or Hubei) adj5 pneumonia).ti,ab,kf,ot.                                                                                                                                                                                                               | 396     |
| 8  | ((Alpha or "B.1.1.7" or Beta or "B.1.351" or Delta or "B.1.617.2" or Omicron or "B.1.1.529" or gamma or lambda) adj3 variant*).tw,kf.                                                                                                                        | 9,600   |
| 9  | 1 or 2 or 3 or 4 or 5 or 6 or 7 or 8                                                                                                                                                                                                                         | 270,102 |
| 10 | Reinfection/ or Recurrence/                                                                                                                                                                                                                                  | 195,522 |
| 11 | (reinfect* or re-infect*).tw,kf,ot.                                                                                                                                                                                                                          | 13,909  |
| 12 | ((repeat* or second* or reactivat* or recurrent*) adj2 infect*).tw,kf,ot.                                                                                                                                                                                    | 32,668  |
| 13 | ((subsequent* or future) adj infect*).tw,kf,ot.                                                                                                                                                                                                              | 3,601   |
| 14 | ((("repeat positive" or "re-positive" or "two positive" or "2 positive") adj5 (pcr or polymerase chain reaction)).tw,kf,ot.                                                                                                                                  | 231     |
| 15 | (new infection* or new SARS-CoV-2 infection*).tw,kf,ot.                                                                                                                                                                                                      | 4,404   |
| 16 | ((risk adj3 infect* or (protect* adj3 (infect* or postinfect*))).tw,kf,ot.                                                                                                                                                                                   | 83,466  |
| 17 | 10 or 11 or 12 or 13 or 14 or 15 or 16                                                                                                                                                                                                                       | 321,390 |
| 18 | 9 and 17                                                                                                                                                                                                                                                     | 8,847   |

|    |                                                                                                                                                                                                            |         |
|----|------------------------------------------------------------------------------------------------------------------------------------------------------------------------------------------------------------|---------|
| 19 | ((natural* or primary) adj2 (infect* or immunit*)).tw,kf,ot.                                                                                                                                               | 41,996  |
| 20 | (low vaccin* or unvaccin* or un-vaccin* or "not vaccin*").tw,kf,ot.                                                                                                                                        | 11,555  |
| 21 | ("anti-SARS-CoV-2 IgG" or seropositiv* or "SARS-CoV-2 antigen positiv*" or "anti-nucleocapsid IgG antibod*" or "antibody positiv*").tw,kf,ot.                                                              | 52,616  |
| 22 | ((prior or previous* or earlier or initial or past) adj2 (infect* or disease or "covid-19" or covid19 or "SARS-CoV-2" or coronavirus or "corona virus")) or ((first or history) adj3 infection*).tw,kf,ot. | 61,975  |
| 23 | ((covid-19" or covid19) adj2 (recovered or recovery)).tw,kf,ot.                                                                                                                                            | 1,998   |
| 24 | ((recovered or convalescen*) adj1 (patient* or population* or person or persons or cases or adults or covid* or sars* or coronavirus*).tw,kf,ot.                                                           | 18,021  |
| 25 | ((hybrid adj3 immunity) or (immunity adj3 (infect* or postinfect*))).tw,kf,ot.                                                                                                                             | 9,108   |
| 26 | 19 or 20 or 21 or 22 or 23 or 24 or 25                                                                                                                                                                     | 188,381 |
| 27 | 18 and 26                                                                                                                                                                                                  | 1,403   |
| 28 | limit 27 to yr="2020 - 2022"                                                                                                                                                                               | 1,398   |

58

59 Embase <Ovid; 2020 to 2022 June 01>

| #  | Query                                                                                                                                                                                                                                               | Results |
|----|-----------------------------------------------------------------------------------------------------------------------------------------------------------------------------------------------------------------------------------------------------|---------|
| 1  | sars-related coronavirus/ or coronavirus disease 2019/ or asymptomatic coronavirus disease 2019/ or long covid/ or exp Severe acute respiratory syndrome coronavirus 2/ or exp SARS coronavirus/ or exp "variant of concern"/                       | 239,763 |
| 2  | (coronavirinae/ or betacoronavirus/ or coronavirus infection/) and (epidemic/ or pandemic/)                                                                                                                                                         | 10,874  |
| 3  | (nCoV* or 2019nCoV or 19nCoV or COVID19* or COVID or SARS-COV-2 or SARSCOV-2 or SARS-COV2 or SARSCOV2 or SARS coronavirus 2 or Severe Acute Respiratory Syndrome Coronavirus 2 or Severe Acute Respiratory Syndrome Corona Virus 2).ti,ab,kf,hw,ot. | 273,124 |
| 4  | ((new or novel or "19" or "2019" or Wuhan or Hubei or China or Chinese) adj3 (coronavirus* or corona virus* or betacoronavirus* or CoV or HCoV)).ti,ab,kf,hw,ot.                                                                                    | 235,343 |
| 5  | (longCOVID* or postCOVID* or postcoronavirus* or postSARS*).ti,ab,kf,hw,ot.                                                                                                                                                                         | 102     |
| 6  | ((coronavirus* or corona virus* or betacoronavirus*) adj3 (pandemic* or epidemic* or outbreak* or crisis)).ti,ab,kf,ot.                                                                                                                             | 12,307  |
| 7  | ((Wuhan or Hubei) adj5 pneumonia).ti,ab,kf,ot.                                                                                                                                                                                                      | 462     |
| 8  | ((Alpha or "B.1.1.7" or Beta or "B.1.351" or Delta or "B.1.617.2" or Omicron or "B.1.1.529" or gamma or lambda) adj3 variant*).tw,kf,ot.                                                                                                            | 10,083  |
| 9  | or/1-8                                                                                                                                                                                                                                              | 303,594 |
| 10 | reinfection/ or recurrent infection/                                                                                                                                                                                                                | 31,916  |
| 11 | (reinfect* or re-infect*).tw,kf,ot.                                                                                                                                                                                                                 | 17,000  |
| 12 | ((repeat* or second* or reactivat* or recurrent*) adj2 infect*).tw,kf,ot.                                                                                                                                                                           | 47,197  |
| 13 | ((subsequent* or future) adj infect*).tw,kf,ot.                                                                                                                                                                                                     | 4,331   |
| 14 | ((repeate positive" or "re-positive" or "two positive" or "2 positive") adj5 (pcr or polymerase chain reaction)).tw,kf,ot.                                                                                                                          | 356     |
| 15 | (new infection* or new SARS-CoV-2 infection*).tw,kf,ot.                                                                                                                                                                                             | 5,757   |
| 16 | ((risk adj3 infect*) or (protect* adj3 (infect* or postinfect*))).tw,kf,ot.                                                                                                                                                                         | 111,501 |
| 17 | or/10-16                                                                                                                                                                                                                                            | 193,620 |
| 18 | 9 and 17                                                                                                                                                                                                                                            | 10,163  |
| 19 | primary infection/                                                                                                                                                                                                                                  | 4,596   |
| 20 | ((natural* or primary) adj2 (infect* or immunit*)).tw,kf,ot.                                                                                                                                                                                        | 47,657  |
| 21 | (low vaccin* or unvaccin* or un-vaccin* or "not vaccin*").tw,kf,ot.                                                                                                                                                                                 | 13,590  |
| 22 | ("anti-SARS-CoV-2 IgG" or seropositiv* or "SARS-CoV-2 antigen positiv*" or "anti-nucleocapsid IgG antibod*" or "antibody positiv*").tw,kf,ot.                                                                                                       | 68,366  |

|    |                                                                                                                                                                                                            |         |
|----|------------------------------------------------------------------------------------------------------------------------------------------------------------------------------------------------------------|---------|
| 23 | ((prior or previous* or earlier or initial or past) adj2 (infect* or disease or "covid-19" or covid19 or "SARS-CoV-2" or coronavirus or "corona virus")) or ((first or history) adj3 infection*).tw,kf,ot. | 93,696  |
| 24 | ("covid-19" or covid19) adj2 (recovered or recovery)).tw,kf,ot.                                                                                                                                            | 2,295   |
| 25 | ((recovered or convalescen*) adj1 (patient* or population* or person or persons or cases or adults or covid* or sars* or coronavirus*).tw,kf,ot.                                                           | 24,455  |
| 26 | ((hybrid adj3 immunity) or (immunity adj3 (infect* or postinfect*))).tw,kf,ot.                                                                                                                             | 10,849  |
| 27 | or/19-26                                                                                                                                                                                                   | 250,722 |
| 28 | 18 and 27                                                                                                                                                                                                  | 1,659   |
| 29 | limit 28 to yr="2020 - 2022"                                                                                                                                                                               | 1,642   |

60 Cochrane Central Register of Controlled Trials <Ovid; 2020 - June 1, 2022>

| #  | Query                                                                                                                                                                                                                                      | Results |
|----|--------------------------------------------------------------------------------------------------------------------------------------------------------------------------------------------------------------------------------------------|---------|
| 1  | COVID-19/ or exp COVID-19 Testing/ or COVID-19 Vaccines/ or SARS-CoV-2/                                                                                                                                                                    | 1,693   |
| 2  | (coronavirus/ or betacoronavirus/ or coronavirus infections/) and (disease outbreaks/ or epidemics/ or pandemics/)                                                                                                                         | 132     |
| 3  | (nCoV* or 2019nCoV or 19nCoV or COVID19* or COVID or SARS-COV-2 or SARSCOV-2 or SARS-COV2 or SARSCOV2 or SARS coronavirus 2 or Severe Acute Respiratory Syndrome Coronavirus 2 or Severe Acute Respiratory Syndrome Corona Virus 2).tw,kw. | 10,613  |
| 4  | ((new or novel or "19" or "2019" or Wuhan or Hubei or China or Chinese) adj3 (coronavirus* or corona virus* or betacoronavirus* or CoV or HCoV)).tw,kw.                                                                                    | 4,898   |
| 5  | (longCOVID* or postCOVID* or postcoronavirus* or postSARS*).tw,kw.                                                                                                                                                                         | 6       |
| 6  | ((coronavirus* or corona virus* or betacoronavirus*) adj3 (pandemic* or epidemic* or outbreak* or crisis)).tw,kw.                                                                                                                          | 245     |
| 7  | ((Wuhan or Hubei) adj5 pneumonia).tw,kw.                                                                                                                                                                                                   | 23      |
| 8  | ((Alpha or "B.1.1.7" or Beta or "B.1.351" or Delta or "B.1.617.2" or Omicron or "B.1.1.529" or gamma or lambda) adj3 variant*).tw,kw.                                                                                                      | 116     |
| 9  | 1 or 2 or 3 or 4 or 5 or 6 or 7 or 8                                                                                                                                                                                                       | 10,921  |
| 10 | Reinfection/ or Recurrence/                                                                                                                                                                                                                | 12,532  |
| 11 | (reinject* or re-infect*).tw,kw.                                                                                                                                                                                                           | 1,308   |
| 12 | ((repeat* or second* or reactivat* or recurrent*) adj2 infect*).tw,kw.                                                                                                                                                                     | 2,580   |
| 13 | ((subsequent* or future) adj infect*).tw,kw.                                                                                                                                                                                               | 162     |
| 14 | ((("repeat positive" or "re-positive" or "two positive" or "2 positive") adj5 (pcr or polymerase chain reaction)).tw,kw.                                                                                                                   | 39      |
| 15 | (new infection* or new SARS-CoV-2 infection*).tw,kw.                                                                                                                                                                                       | 438     |
| 16 | ((risk adj3 infect*) or (protect* adj3 (infect* or postinfect*))).tw,kw.                                                                                                                                                                   | 7,338   |
| 17 | 10 or 11 or 12 or 13 or 14 or 15 or 16                                                                                                                                                                                                     | 23,434  |
| 18 | 9 and 17                                                                                                                                                                                                                                   | 420     |
| 19 | ((natural* or primary) adj2 (infect* or immunit*).tw,kw.                                                                                                                                                                                   | 1,581   |
| 20 | (low vaccin* or unvaccin* or un-vaccin* or "not vaccin*").tw,kw.                                                                                                                                                                           | 778     |
| 21 | ("anti-SARS-CoV-2 IgG" or seropositiv* or "SARS-CoV-2 antigen positiv*" or "anti-nucleocapsid IgG antibod*" or "antibody positiv*").tw,kw.                                                                                                 | 3,502   |
| 22 | ((prior or previous* or earlier or initial or past) adj2 (infect* or disease or "covid-19" or covid19 or "SARS-CoV-2" or coronavirus or "corona virus")) or ((first or history) adj3 infection*).tw,kw.                                    | 5,291   |
| 23 | ("covid-19" or covid19) adj2 (recovered or recovery)).tw,kw.                                                                                                                                                                               | 154     |



|    |                                                                                                                                               |        |
|----|-----------------------------------------------------------------------------------------------------------------------------------------------|--------|
| 24 | ((recovered or convalescen*) adj1 (patient* or population* or person or persons or cases or adults or covid* or sars* or coronavirus*).tw,kw. | 767    |
| 25 | ((hybrid adj3 immunity) or (immunity adj3 (infect* or postinfect*))).tw,kw.                                                                   | 297    |
| 26 | 19 or 20 or 21 or 22 or 23 or 24 or 25                                                                                                        | 11,924 |
| 27 | 18 and 26                                                                                                                                     | 56     |

61  
62  
63

Web of Science- (A&HCI , BKCI-SSH , BKCI-S , CCR-EXPANDED , ESCI , IC , CPCI-SSH , CPCI-S , SCI-EXPANDED , SSCI) <2020 - June 1, 2022>

| # | Search string                                                                                                                                                                                                                                                                                                                                                                                                                                                                                                                                                                                                                                                                                                                                                                                        | Results |
|---|------------------------------------------------------------------------------------------------------------------------------------------------------------------------------------------------------------------------------------------------------------------------------------------------------------------------------------------------------------------------------------------------------------------------------------------------------------------------------------------------------------------------------------------------------------------------------------------------------------------------------------------------------------------------------------------------------------------------------------------------------------------------------------------------------|---------|
| 1 | (TS=((nCoV* or 2019nCoV or 19nCoV or COVID19* or COVID or SARS-COV-2 or SARSCOV-2 or SARS-COV2 or SARSCOV2 or SARS coronavirus 2 or Severe Acute Respiratory Syndrome Coronavirus 2 or Severe Acute Respiratory Syndrome Corona Virus 2))) OR TS((((new or novel or "19" or "2019" or Wuhan or Hubei or China or Chinese) NEAR/3 (coronavirus* or "corona virus*" or betacoronavirus* or CoV or HCoV)) OR (longCOVID* or postCOVID* or postcoronavirus* or postSARS*)) OR ((coronavirus* or "corona virus*" or betacoronavirus*) NEAR/3 (pandemic* or epidemic* or outbreak* or crisis)) OR ((Wuhan or Hubei) NEAR/5 pneumonia) OR ((Alpha or "B.1.1.7" or Beta or "B.1.351" or Delta or "B.1.617.2" or Omicron or "B.1.1.529" or gamma or lambda) NEAR/3 variant*)) )<br><br>[Exact search applied] | 318,009 |
| 2 | TS((((reinflect* or re-infect*) OR ((repeat* or second* or reactivat* or recurrent*) NEAR/2 infect*) OR ("new infection*" or "new SARS-CoV-2 infection*") OR ((repeat positive" or "re-positive" or "two positive" or "2 positive") NEAR/5 (pcr or "polymerase chain reaction")) OR ((subsequent* or future) NEAR/1 infect*) OR (risk NEAR/3 infect*) OR (protect* NEAR/3 (infect* or postinfect*)))) )<br><br>[Exact search applied]                                                                                                                                                                                                                                                                                                                                                                | 165,361 |
| 3 | TS((((natural* or primary) NEAR/2 (infect* or immunit*)) OR ("low vaccin*" or unvaccin* or "un-vaccin*" or "not vaccin*") OR ((prior or previous* or earlier or initial or past) NEAR/2 (infect* or disease or "covid-19" or covid19 or "SARS-CoV-2" or coronavirus or "corona virus")) or ((first or history) NEAR/4 infection*) OR "anti-SARS-CoV-2 IgG" or seropositiv* or "SARS-CoV-2 antigen positiv*" or "anti-nucleocapsid IgG antibod*" or "antibody positiv*" or ("immunity") NEAR/5 (infection* or postinfect* or hybrid)) OR ((covid-19" or covid19) NEAR/2 (recovered or recovery)) OR ((recovered or convalescen*) NEAR/1 (patient* or population* or person or persons or cases or adults or covid* or sars* or coronavirus*)) )<br><br>[Exact search applied]                         | 226,129 |
| 4 | (#1 AND #2 AND #3) and 2022 or 2021 or 2020 (Publication Years)                                                                                                                                                                                                                                                                                                                                                                                                                                                                                                                                                                                                                                                                                                                                      | 1729    |

64

65 WHO Covid-19 Database - June 1, 2022 (1252 results)

66

67 (ti:(("reinfection" OR "reinfections" OR "re-infection" OR "re-infections" OR "Repeat infections" OR "recurrent  
68 infections" OR "repeat positive")) OR (tw:(("reinfection" OR "reinfections" OR "re-infection" OR "re-infections"  
69 OR "Repeat infections" OR "recurrent infections" OR "repeat positive" OR "new infection" OR "risk of infection"  
70 OR "new SARS-CoV-2 infection") AND ("natural infection" OR "primary infection" OR "natural immunity" OR  
71 unvaccin\* OR "un-vaccinated" OR "not vaccinated" OR "Prior infection" OR "previous infection" OR "first  
72 infection" OR "past infection" OR seropositiv\* OR "antigen positive" OR "antibody positive" OR "postinfection  
73 immunity" OR "infection acquired immunity" OR "naturally acquired immunity" OR "recovered patients" OR  
74 "convalescent patients" OR "hybrid immunity" OR "hybrid protection"))))

75

76

77 EuropePMC – June 1, 2022 (1044 results)

78 (ABSTRACT:(COVID19\* OR COVID OR “SARS-COV-2” OR “SARSCOV-2” OR SARSCOV2 OR “Corona  
79 Virus” OR coronavirus OR postcovid OR longcovid) OR TITLE:(COVID19\* OR COVID OR “SARS-COV-2” OR  
80 “SARSCOV-2” OR SARSCOV2 OR “Corona Virus” OR coronavirus OR postcovid OR longcovid) OR  
81 KW:(COVID19\* OR COVID OR “SARS-COV-2” OR “SARSCOV-2” OR SARSCOV2 OR “Corona Virus” OR  
82 coronavirus OR postcovid OR longcovid)) AND (ABSTRACT:(reinflect\* OR "re-infect\*" OR "second\* infection\*" OR  
83 OR "repeat\* infection\*" OR “reactivated infection\*” OR ”recurrent infection\*” OR "new infection\*" OR "new  
84 SARS-CoV-2 infection\*" OR “subsequent infection\*” OR “future infection\*” OR “risk of infection\*” OR “risk of  
85 Covid\* infection”) OR TITLE:(reinflect\* OR "re-infect\*" OR "second\* infection\*" OR "repeat\* infection\*" OR  
86 “reactivated infection\*” OR ”recurrent infection\*” OR "new infection\*" OR "new SARS-CoV-2 infection\*" OR  
87 “subsequent infection\*” OR “future infection\*” OR “risk of infection\*” OR “risk of Covid\* infection”) OR  
88 KW:(reinflect\* OR "re-infect\*" OR "second\* infection\*" OR "repeat\* infection\*" OR “reactivated infection\*” OR  
89 ”recurrent infection\*” OR "new infection\*" OR "new SARS-CoV-2 infection\*" OR “subsequent infection\*” OR  
90 “future infection\*” OR “risk of infection\*” OR “risk of Covid\* infection”)) AND (ABSTRACT:(“natural  
91 infection\*” OR “primary infection\*” OR “natural immunity” OR “naturally acquired immunity” OR unvaccin\* OR  
92 "un-vaccin\*" OR "not vaccin\*" OR “Prior infection\*” OR “previous infection\*” OR “previously infected” OR "first  
93 infection\*" OR “past infection\*” OR seropositiv\* OR "antigen positiv\*" or "anti-nucleocapsid IgG antibod\*" or  
94 "antibody positiv\*" OR "postinfection immunity” OR “infection acquired immunity” OR “recovered patient\*” OR  
95 “convalescen\* patient\*” OR “hybrid immunity” OR “hybrid protection”) OR TITLE:(“natural infection\*” OR  
96 “primary infection\*” OR “natural immunity” OR “naturally acquired immunity” OR unvaccin\* OR "un-vaccin\*" OR  
97 OR "not vaccin\*" OR “Prior infection\*” OR “previous infection\*” OR “previously infected” OR "first infection\*" OR  
98 OR “past infection\*” OR seropositiv\* OR "antigen positiv\*" or "anti-nucleocapsid IgG antibod\*" or "antibody  
99 positiv\*" OR "postinfection immunity” OR “infection acquired immunity” OR “recovered patient\*” OR  
100 “convalescen\* patient\*” OR “hybrid immunity” OR “hybrid protection”) OR KW:(“natural infection\*” OR  
101 “primary infection\*” OR “natural immunity” OR “naturally acquired immunity” OR unvaccin\* OR "un-vaccin\*" OR  
102 OR "not vaccin\*" OR “Prior infection\*” OR “previous infection\*” OR “previously infected” OR "first infection\*" OR  
103 OR “past infection\*” OR seropositiv\* OR "antigen positiv\*" or "anti-nucleocapsid IgG antibod\*" or "antibody  
104 positiv\*" OR "postinfection immunity” OR “infection acquired immunity” OR “recovered patient\*” OR  
105 “convalescen\* patient\*” OR “hybrid immunity” OR “hybrid protection”)) AND (SRC:"PPR")

106

107 ClinicalTrials.Gov - June 1, 2022 (12 studies)

108

109 reinfection OR reinfections OR "re-infection" OR "re-infections" OR "repeat infection" OR "second infection" OR  
110 "future infection" OR "subsequent infection" OR "recurrent infection" OR "prior infection" OR "previous infection"  
111 | Completed, Unknown status Studies | COVID-19 OR Coronavirus

112

113

114 **Appendix 3. Additional methodological details**

115 **Detailed inclusion criteria**

|                         |                                                                                                                                                                                                                                                                                                                                                                                                                                                                                                                                                                                                                                                                                                                                                                                                                                                                                                                                                                                                                                                                                                                                                                                                                                                                                                                                                                                                                                                                                                                                                                                                                                                                                                                                                                                                                                                                                                                                                                                                                                    |
|-------------------------|------------------------------------------------------------------------------------------------------------------------------------------------------------------------------------------------------------------------------------------------------------------------------------------------------------------------------------------------------------------------------------------------------------------------------------------------------------------------------------------------------------------------------------------------------------------------------------------------------------------------------------------------------------------------------------------------------------------------------------------------------------------------------------------------------------------------------------------------------------------------------------------------------------------------------------------------------------------------------------------------------------------------------------------------------------------------------------------------------------------------------------------------------------------------------------------------------------------------------------------------------------------------------------------------------------------------------------------------------------------------------------------------------------------------------------------------------------------------------------------------------------------------------------------------------------------------------------------------------------------------------------------------------------------------------------------------------------------------------------------------------------------------------------------------------------------------------------------------------------------------------------------------------------------------------------------------------------------------------------------------------------------------------------|
| <b>Population</b>       | Humans of any age, in any geographical setting.                                                                                                                                                                                                                                                                                                                                                                                                                                                                                                                                                                                                                                                                                                                                                                                                                                                                                                                                                                                                                                                                                                                                                                                                                                                                                                                                                                                                                                                                                                                                                                                                                                                                                                                                                                                                                                                                                                                                                                                    |
| <b>Exposure group</b>   | <p>Confirmed case of SARS-CoV-2 infection with or without COVID-19 vaccination.</p> <p>SARS-CoV-2 infection was defined as a <b>confirmed case</b> according to the following criteria, adapted from WHO case definitions<sup>2</sup>: positive nucleic acid amplification test (NAAT) according to laboratory records or self-report, positive SARS-CoV-2 antigen rapid diagnostic test (AgRDT) according to laboratory records or self-report, or a positive serology test from a lab-based assay (i.e., CLIA/ELISA) or an antibody-detecting rapid diagnostic test (Ab-RDT).</p> <p>Studies were included if they reported on individuals with previously confirmed infection that had documented vaccination (partial primary series, full primary series, or boosted), as defined in the randomized controlled trials for each vaccine.</p> <p><b>Partial vaccination</b> was defined as <math>\geq 14</math> days after a single dose of Pfizer/BioNTech-Comirnaty (BNT162b2), AstraZeneca-Vaxzevria, Moderna-mRNA-1273, or Sinovac-CoronaVac, <math>\geq 21</math> days after a single dose of Sinopharm-BBIBP-CorV or Gamaleja-Sputnik-V, <math>&lt; 7</math> days from the second dose for Pfizer/BioNTech-Comirnaty (BNT162b2), <math>&lt; 14</math> days from the second dose for AstraZeneca-Vaxzevria, Moderna-mRNA-1273, or Sinovac-CoronaVac, and <math>&lt; 21</math> days from the second dose of Sinopharm-BBIBP-CorV or Gamaleja-Sputnik-V.</p> <p><b>Primary series vaccination</b> was defined as <math>\geq 7</math> days from the second dose for Pfizer/BioNTech-Comirnaty, <math>\geq 14</math> days from the first dose of Janssen-Ad26.COVS, <math>\geq 14</math> days from the second dose for AstraZeneca-Vaxzevria, Moderna-mRNA-1273, Sinovac-CoronaVac, or BBIBP-CorV Sinopharm, and <math>\geq 21</math> days from the second dose of Gamaleja-Sputnik-V.</p> <p><b>Booster vaccination</b> was defined as <math>\geq 7</math> days from an additional dose after primary series vaccination.</p> |
| <b>Comparison group</b> | <p>Five comparison groups were eligible:</p> <ol style="list-style-type: none"> <li>(1) no previous vaccinations and no previously confirmed SARS-CoV-2 infection defined using WHO criteria;</li> <li>(2) previously SARS-CoV-2 infection defined using WHO criteria (defined above);</li> <li>(3) partial primary series vaccination (defined above);</li> <li>(4) full primary series vaccination (defined above);</li> <li>(5) booster vaccination (defined above).</li> </ol>                                                                                                                                                                                                                                                                                                                                                                                                                                                                                                                                                                                                                                                                                                                                                                                                                                                                                                                                                                                                                                                                                                                                                                                                                                                                                                                                                                                                                                                                                                                                                 |
| <b>Outcome</b>          | <p>SARS-CoV-2 Omicron reinfection was defined as a possible, probable, or confirmed reinfection case according to the following criteria, adapted from WHO case definitions.</p> <p><b>Possible reinfection case</b> was defined as a NAAT or AgRDT SARS-CoV-2 positive case with a history of a primary SARS-CoV-2 infection diagnosed by serology, with at least 60 days between the positive serology test and the subsequent positive NAAT or AgRDT.</p> <p><b>Probable reinfection case</b> was defined as a NAAT or AgRDT SARS-CoV-2 positive case with a history of a primary SARS-CoV-2 infection diagnosed by NAAT or AgRDT. At least 90 days must have elapsed between the episodes or, alternatively, genomic evidence for the second episode must be available and include a lineage that was not submitted to SARS-Cov-2 genomic databases at the time of first infection.</p> <p><b>Confirmed reinfection case</b> was defined as two PCR positive episodes supported by viral genomic data from both episodes of infection revealing different Pango lineages. If viral genomic data revealed two distinct Pango lineages, this qualified as adequate evidence to confirm reinfection, regardless of the time elapsed between the two episodes.</p>                                                                                                                                                                                                                                                                                                                                                                                                                                                                                                                                                                                                                                                                                                                                                                 |

|                           |                                                                                                                                                                                                                                                                                                                                                                                                                                                                                                                                                                                                                                                                                                                                                                                                                                                                                                                                                                                                                                                                                                                                                                                                                                                                                                                                                                                                                                                                                                                                                                                                                                                                                                                                                                                                                                         |
|---------------------------|-----------------------------------------------------------------------------------------------------------------------------------------------------------------------------------------------------------------------------------------------------------------------------------------------------------------------------------------------------------------------------------------------------------------------------------------------------------------------------------------------------------------------------------------------------------------------------------------------------------------------------------------------------------------------------------------------------------------------------------------------------------------------------------------------------------------------------------------------------------------------------------------------------------------------------------------------------------------------------------------------------------------------------------------------------------------------------------------------------------------------------------------------------------------------------------------------------------------------------------------------------------------------------------------------------------------------------------------------------------------------------------------------------------------------------------------------------------------------------------------------------------------------------------------------------------------------------------------------------------------------------------------------------------------------------------------------------------------------------------------------------------------------------------------------------------------------------------------|
|                           | <p><b>Hospitalization</b> was defined as any admission to hospital with a confirmed case of SARS-CoV-2, adapted from WHO case definitions.<sup>3</sup></p> <p><b>Severe disease</b> was defined using a combination of the WHO definitions of severe, critical and fatal COVID-19<sup>4,5</sup>:</p> <ul style="list-style-type: none"> <li>- Severe COVID-19 disease was a SARS-CoV-2 infected person with “oxygen saturation of &lt;90% on room air, and/or respiratory rate of &gt;30 breaths/minute in adults and children &gt;5 years old (or ≥60 breaths/minute in children &lt;2 months old or ≥50 breaths/minute in children 2-11 months old or ≥40 breaths/minute in children 1–5 years old), and/or signs of severe respiratory distress (accessory muscle use and inability to complete full sentences, and, in children, very severe chest wall indrawing, grunting, central cyanosis, or presence of any other general danger signs)”.</li> <li>- Critical COVID-19 disease was a SARS-CoV-2 infected person with “acute respiratory distress syndrome, sepsis, septic shock, or other conditions that would normally require the provision of life sustaining therapies such as mechanical ventilation (invasive or non-invasive) or vasopressor therapy”.</li> <li>- COVID-19 death was “a death resulting from a clinically compatible illness, in a probable or confirmed COVID-19 case, unless there is a clear alternative cause of death that cannot be related to COVID-19 disease (e.g., trauma). There should be no period of complete recovery from COVID-19 between illness and death. A death due to COVID-19 may not be attributed to another disease (e.g., cancer) and should be counted independently of preexisting conditions that are suspected of triggering a severe course of COVID-19”.</li> </ul> |
| <b>Study design</b>       | Test-negative case-control, case-control, cross-sectional, cohort, non-randomized controlled trials, and randomized controlled trials.                                                                                                                                                                                                                                                                                                                                                                                                                                                                                                                                                                                                                                                                                                                                                                                                                                                                                                                                                                                                                                                                                                                                                                                                                                                                                                                                                                                                                                                                                                                                                                                                                                                                                                  |
| <b>Type of literature</b> | Published peer-reviewed research articles, preprints, and grey literature in any language. We will prioritize peer-reviewed versions of articles for inclusion and analysis in instances where pre-print versions of peer-reviewed articles are available.                                                                                                                                                                                                                                                                                                                                                                                                                                                                                                                                                                                                                                                                                                                                                                                                                                                                                                                                                                                                                                                                                                                                                                                                                                                                                                                                                                                                                                                                                                                                                                              |

116

117

**Detailed exclusion criteria**

|                           |                                                                                                                                                                                                                                                                                                                                                                   |
|---------------------------|-------------------------------------------------------------------------------------------------------------------------------------------------------------------------------------------------------------------------------------------------------------------------------------------------------------------------------------------------------------------|
| <b>Population</b>         | N/A                                                                                                                                                                                                                                                                                                                                                               |
| <b>Exposure group</b>     | No evidence of prior infection (defined above). No information on the timing, brand, or dose number for the vaccination in hybrid immunity studies.                                                                                                                                                                                                               |
| <b>Comparison group</b>   | N/A                                                                                                                                                                                                                                                                                                                                                               |
| <b>Outcome</b>            | Pre-Omicron reinfection. Prior infection studies that did not report the period of time between primary infection and reinfection. Hybrid immunity studies that did not report the period of time between either the determination of primary infection or vaccination and reinfection. Articles reporting identical information to previously included articles. |
| <b>Study design</b>       | Case reports, case series, incomplete randomized controlled trials, and review papers. Pre-print version of articles subsequently published in peer-reviewed journals.                                                                                                                                                                                            |
| <b>Type of literature</b> | Media, news stories, and conference abstracts.                                                                                                                                                                                                                                                                                                                    |

118

119

**Requesting data from authors**

120

Authors were contacted by email to request the data if relevant data were presented in figures but not reported numerically, if data for Omicron was reported in combination with another variant of concern, or if different levels of hybrid immunity were reported in combination (i.e., partial, primary series, first booster, second booster).

121

122

123

124

**Article, study, and estimate definitions**

125

We defined an article as a published peer-reviewed or pre-print manuscript including any appendices or supplementary files. We defined a study as an investigation reported in an article that involved a single set of criteria defining participant inclusion and exclusion, applied a defined sampling strategy to a particular population, and

126

127

128 provided estimates unique to that population at one time point or over time. An article was deemed to report  
129 multiple studies if it described two or more investigations that used different sets of participant inclusion or  
130 exclusion criteria, applied a different sampling strategy to the same population, or applied the same sampling  
131 strategy to different populations and reported non-pooled estimates unique to each population. An estimate was  
132 defined as a numerical value calculated based on the events observed in the sample being studied and intended to  
133 represent a population parameter.

#### 134 135 **Outcome definition and comparison groups**

136 Estimates of vaccine effectiveness (i.e., vaccine vs. unvaccinated) against Omicron variant were obtained from a  
137 recent systematic and meta-regression to compare to estimates of the protective effectiveness of prior infection and  
138 protective effectiveness of hybrid immunity generated in our analysis.<sup>6</sup> The vaccine effectiveness systematic review  
139 used similar inclusion and exclusion criteria to our review. The raw analysis dataset used in the vaccine  
140 effectiveness paper was obtained by contacting the corresponding author. The dataset contained the “primary series  
141 vs unvaccinated” comparison data and “first booster dose vs unvaccinated” comparison data. We applied our meta-  
142 regression model to the dataset to project the trends of vaccine effectiveness protection waning, in parallel to trends  
143 of prior infection effectiveness and hybrid immunity effectiveness waning that were generated from data procured in  
144 our review. Results are shown in figure 3.

#### 145 146 **Data extraction**

147 All reviewers completed data extraction training which included completion of two pilot extractions with feedback  
148 from a trained reviewer that independently extracted the same articles. Team meetings were held twice per week  
149 during the extraction phase to discuss and resolve data extraction challenges.

#### 150 151 **Analysis**

152 To model waning protection over time, we used log-odds meta-regression to bound protection between 0% and  
153 100% and to translate non-linear waning on a percentage scale as linear waning on the log-odds scale. In this model,  
154 we regressed the log-odds of protective effectiveness and comparative protective effectiveness on the mean time  
155 since the last immunological challenge (i.e., last vaccine dose or infection).<sup>7</sup> For studies reporting risk ratios or  
156 hazard ratios, we converted them to the odds ratio.<sup>8</sup> Our model also included a random intercept for each study,  
157 shared across all estimates of protection used from that study. Hybrid immunity analyses did not consider the order  
158 in which the immunity status was conferred (e.g., vaccination then infection or vice versa). We extracted data for  
159 each available time point and identified the mean time since the last immunological challenge. We then regressed  
160 the log-odds of protective effectiveness and comparative protective effectiveness on months since the last  
161 immunological challenge.<sup>7</sup>

162  
163 When calculating effect measures involving hybrid immunity the time points for the exposure group was determined  
164 based on the most recently documented immunological challenge (i.e., vaccination or infection) prior to the period  
165 assessed for reinfection. Hybrid immunity analyses did not consider the order in which the immunity status was  
166 conferred (e.g., vaccination then infection or vice versa).

167  
168 We did not differentiate between Omicron sub-variants.

#### 169 170 **Protocol deviations**

171 There were two deviations from our protocol which were enacted to expand the scope of eligible data for inclusion:

- 172 1) The list of eligible types of vaccination was expanded to include any type of vaccination.
- 173 2) We did not restrict inclusion based on the accuracy of rapid diagnostic tests for confirming the index  
174 SARS-CoV-2 infection. Instead, the accuracy of the rapid diagnostic tests was considered as part of our  
175 risk of bias assessment.

176  
177

## Appendix 4. Detailed list of comparisons with corresponding effect measures and epidemiological and policy questions

| Epidemiological and policy questions                                                                                                                                 | Effect measures                                                                                                                      | Definition                                                                                                                                                                                                                                                                                                                                                                                                                                                       | Potential comparisons for analysis <sup>a</sup>                                                                                                                                                                                                                                                                                                                                                                                                                              |
|----------------------------------------------------------------------------------------------------------------------------------------------------------------------|--------------------------------------------------------------------------------------------------------------------------------------|------------------------------------------------------------------------------------------------------------------------------------------------------------------------------------------------------------------------------------------------------------------------------------------------------------------------------------------------------------------------------------------------------------------------------------------------------------------|------------------------------------------------------------------------------------------------------------------------------------------------------------------------------------------------------------------------------------------------------------------------------------------------------------------------------------------------------------------------------------------------------------------------------------------------------------------------------|
| How much protection is conferred by prior infection?                                                                                                                 | Protective effectiveness of prior infection                                                                                          | The protective effectiveness of prior infection was 1 - odds ratio for reinfection derived by comparing previously infected (I1) unvaccinated (V0) individuals versus previously uninfected (I0) unvaccinated (V0) individuals.                                                                                                                                                                                                                                  | Prior infection vs Naive: V0/I1 vs. V0/I0                                                                                                                                                                                                                                                                                                                                                                                                                                    |
| How much protection is conferred by hybrid immunity involving partial primary series, full primary series, or booster vaccination?                                   | Protective effectiveness of hybrid immunity                                                                                          | The protective effectiveness of hybrid immunity was 1 - odds ratio for reinfection derived by comparing individuals with hybrid immunity from previous infection (I1) and partial primary series (VP), full primary series (VF), or booster (VB) vaccination versus previously uninfected (I0) unvaccinated (V0) individuals.                                                                                                                                    | Hybrid with partial primary series vs Naive: VP/I1 vs. V0/I0<br><br>Hybrid with full primary series vs Naive: VF/I1 vs. V0/I0<br><br>Hybrid with first booster vs Naive: VB/I1 vs. V0/I0                                                                                                                                                                                                                                                                                     |
| Do individuals with hybrid immunity have greater protection compared to individuals with prior infection alone?                                                      | Comparative protective effectiveness of hybrid immunity relative to prior infection alone                                            | The comparative protective effectiveness of hybrid immunity relative to prior infection alone was 1 - odds ratio for reinfection derived by comparing individuals with hybrid immunity from previous infection (I1) and partial primary series (VP), full primary series (VF), or booster (VB) vaccination versus previously infected (I1) unvaccinated (V0) individuals.                                                                                        | Hybrid with partial primary series vs Infection: VP/I1 vs. V0/I1<br><br>Hybrid with full primary series hybrid vs Infection: VF/I1 vs. V0/I1<br><br>Hybrid with first booster vs Infection: VB/I1 vs. V0/I1                                                                                                                                                                                                                                                                  |
| Do individuals with hybrid immunity have greater protection compared to individuals with prior vaccination alone?                                                    | Comparative protective effectiveness of hybrid immunity relative to prior vaccination only                                           | The comparative protective effectiveness of hybrid immunity relative to prior vaccination alone was 1 - odds ratio for reinfection derived by comparing individuals with hybrid immunity from previous infection (I1) and partial primary series (VP), full primary series (VF), or booster (VB) vaccination versus previously uninfected (I1) individuals with partial primary series (VP) or full primary series (VF) vaccination.                             | Hybrid with partial primary series vs. Partial primary series: VP/I1 vs. VP/I0<br><br>Hybrid with partial primary series vs. Full primary series: VP/I1 vs. VF/I0<br><br>Hybrid with partial primary series vs. First booster: VP/I1 vs. VB/I0<br><br>Hybrid with full primary series vs. Full primary series: VF/I1 vs. VF/I0<br><br>Hybrid with full primary series vs. First booster: VF/I1 vs. VB/I0<br><br>Hybrid with first booster vs. First booster: VB/I1 vs. VB/I0 |
| Do individuals with hybrid immunity and a greater number of vaccine doses have more protection compared to individuals with hybrid immunity and fewer vaccine doses? | Comparative protective effectiveness of hybrid immunity with more vaccine doses relative to hybrid immunity with fewer vaccine doses | The comparative protective effectiveness of hybrid immunity with more vaccine doses relative to hybrid immunity with fewer vaccine doses was 1 - odds ratio for reinfection derived by comparing individuals with hybrid immunity from previous infection (I1) and primary series (VF) or booster (VB) vaccination versus individuals with hybrid immunity from previous infection (I1) and partial primary series (VP) or full primary series (VF) vaccination. | Hybrid with full primary series vs. Hybrid with partial primary series: VF/I1 vs. VP/I1<br><br>Hybrid with first booster vs. Hybrid with primary series: VB/I1 vs. VF/I1<br><br>Hybrid with first booster vs. Hybrid with partial primary series: VB/I1 vs. VP/I1                                                                                                                                                                                                            |

178  
179  
180

<sup>a</sup>Prior infection abbreviations: previously infected - I1; never infected - I0. Vaccination abbreviations: unvaccinated - V0; partial primary series vaccination - VP; full primary series vaccination - VF; first booster vaccination - VB. The notation when combining immunity status for prior infection and vaccination was a slash (/), which did not imply an order of the events (e.g., full primary series vaccination and prior infection was denoted as VF/I1).

### Appendix 5. Characteristics and results of individual prior infection studies included in meta-analysis

| Author (Country)                    | Study Design (Variables controlled for in the prior infection protection estimates)                                   | Severity of Infection             | Reinfection variant | Prior Infected Variant | Days since Prior Infection/ Vaccination Completion (Median [Range]) | Age Range | Protection (Prior infection vs. Immune naive) [95% CI] | Risk of Bias |
|-------------------------------------|-----------------------------------------------------------------------------------------------------------------------|-----------------------------------|---------------------|------------------------|---------------------------------------------------------------------|-----------|--------------------------------------------------------|--------------|
| Altarawneh 1 (Qatar) <sup>9</sup>   | Test-negative case-control (Matched cohorts. Adjusted for presence of co-morbidities)                                 | Any Infection                     | Omicron             | Mixed variant          | 180 [90-269]                                                        | All ages  | 64.0% [54.7-71.4%]                                     | Serious      |
|                                     |                                                                                                                       | Any Infection                     | Omicron             | Mixed variant          | 360 [270-449]                                                       | All ages  | 47.2% [37.5-55.4%]                                     | Serious      |
|                                     |                                                                                                                       | Any Infection                     | Omicron             | Mixed variant          | 450                                                                 | All ages  | 59.6% [50.7-67%]                                       | Serious      |
|                                     |                                                                                                                       | Hospitalization or severe disease | Omicron             | Mixed variant          | 314                                                                 | All ages  | 87.8% [47.5-97.1%]                                     | Moderate     |
| Altarawneh 2 (Qatar) <sup>10</sup>  | Test-negative case-control (Matched cohorts. Adjusted for sex, age group, nationality, and calendar week of PCR test) | Any Infection                     | Omicron             | Mixed variant          | 324                                                                 | All ages  | 44.9% [39.2-50.1%]                                     | Moderate     |
|                                     |                                                                                                                       | Any Infection                     | Omicron (BA.1)      | Mixed variant          | 324                                                                 | All ages  | 50.2% [38.1-59.9%]                                     | Moderate     |
|                                     |                                                                                                                       | Any Infection                     | Omicron (BA.2)      | Mixed variant          | 324                                                                 | All ages  | 46.1% [39.5-51.9%]                                     | Moderate     |
|                                     |                                                                                                                       | Hospitalization or severe disease | Omicron             | Mixed variant          | 324                                                                 | All ages  | 85.5% [49.1-95.9%]                                     | Moderate     |
|                                     |                                                                                                                       | Hospitalization or severe disease | Omicron (BA.1)      | Mixed variant          | 324                                                                 | All ages  | 92.7% [1.0-99.6%]                                      | Moderate     |
|                                     |                                                                                                                       | Hospitalization or severe disease | Omicron (BA.2)      | Mixed variant          | 324                                                                 | All ages  | 73.4% [0.2-92.9%]                                      | Moderate     |
| Andeweg (Netherlands) <sup>11</sup> | Test-negative case-control (Adjusted for age, sex, health region, and testing date)                                   | Any Infection                     | Omicron (BA.1)      | Index-Delta            | 104 [90-119]                                                        | 18-100    | 57% [52-62%]                                           | Serious      |
|                                     |                                                                                                                       | Any Infection                     | Omicron (BA.1)      | Index-Delta            | 134 [120-149]                                                       | 18-100    | 55% [46-62%]                                           | Serious      |
|                                     |                                                                                                                       | Any Infection                     | Omicron (BA.1)      | Index-Delta            | 164 [150-179]                                                       | 18-100    | 53% [43-60%]                                           | Serious      |
|                                     |                                                                                                                       | Any Infection                     | Omicron (BA.1)      | Index-Delta            | 194 [180-209]                                                       | 18-100    | 52% [45-58%]                                           | Serious      |
|                                     |                                                                                                                       | Any Infection                     | Omicron (BA.1)      | Index-Delta            | 210                                                                 | 18-100    | 34% [31-38%]                                           | Serious      |
|                                     |                                                                                                                       | Any Infection                     | Omicron (BA.1)      | Index-Delta            | 104 [90-119]                                                        | 18-100    | 55% [48-60%]                                           | Serious      |
|                                     |                                                                                                                       | Any Infection                     | Omicron (BA.1)      | Index-Delta            | 134 [120-149]                                                       | 18-100    | 51% [41-60%]                                           | Serious      |
|                                     |                                                                                                                       | Any Infection                     | Omicron (BA.1)      | Index-Delta            | 164 [150-179]                                                       | 18-100    | 54% [44-62%]                                           | Serious      |
|                                     |                                                                                                                       | Any Infection                     | Omicron (BA.1)      | Index-Delta            | 194 [180-209]                                                       | 18-100    | 53% [45-59%]                                           | Serious      |
|                                     |                                                                                                                       | Any Infection                     | Omicron (BA.1)      | Index-Delta            | 210                                                                 | 18-100    | 37% [33-40%]                                           | Serious      |
|                                     |                                                                                                                       | Any Infection                     | Omicron (BA.2)      | Index-Delta            | 104 [90-119]                                                        | 18-100    | 50% [43-56%]                                           | Serious      |
|                                     |                                                                                                                       | Any Infection                     | Omicron (BA.2)      | Index-Delta            | 134 [120-149]                                                       | 18-100    | 57% [49-64%]                                           | Serious      |
|                                     |                                                                                                                       | Any Infection                     | Omicron (BA.2)      | Index-Delta            | 164 [150-179]                                                       | 18-100    | 50% [36-61%]                                           | Serious      |
|                                     |                                                                                                                       | Any Infection                     | Omicron (BA.2)      | Index-Delta            | 194 [180-209]                                                       | 18-100    | 53% [42-62%]                                           | Serious      |

|                               |                                                                                                         |               |                |                                  |               |        |              |         |
|-------------------------------|---------------------------------------------------------------------------------------------------------|---------------|----------------|----------------------------------|---------------|--------|--------------|---------|
|                               |                                                                                                         | Any Infection | Omicron (BA.2) | Index-Delta                      | 210           | 18-100 | 38% [34-43%] | Serious |
|                               |                                                                                                         | Any Infection | Omicron (BA.2) | Index-Delta                      | 104 [90-119]  | 18-100 | 50% [43-56%] | Serious |
|                               |                                                                                                         | Any Infection | Omicron (BA.2) | Index-Delta                      | 134 [120-149] | 18-100 | 58% [50-66%] | Serious |
|                               |                                                                                                         | Any Infection | Omicron (BA.2) | Index-Delta                      | 164 [150-179] | 18-100 | 55% [41-65%] | Serious |
|                               |                                                                                                         | Any Infection | Omicron (BA.2) | Index-Delta                      | 194 [180-209] | 18-100 | 52% [40-62%] | Serious |
|                               |                                                                                                         | Any Infection | Omicron (BA.2) | Index-Delta                      | 210           | 18-100 | 40% [35-44%] | Serious |
|                               |                                                                                                         | Any Infection | Omicron (BA.1) | Index-Delta                      | 104 [90-119]  | 18-100 | 42% [1-68%]  | Serious |
|                               |                                                                                                         | Any Infection | Omicron (BA.1) | Index-Delta                      | 134 [120-149] | 18-100 | 31% [1-54%]  | Serious |
|                               |                                                                                                         | Any Infection | Omicron (BA.1) | Index-Delta                      | 164 [150-179] | 18-100 | 28% [8-43%]  | Serious |
|                               |                                                                                                         | Any Infection | Omicron (BA.1) | Index-Delta                      | 194 [180-209] | 18-100 | 12% [1-43%]  | Serious |
|                               |                                                                                                         | Any Infection | Omicron (BA.1) | Index-Delta                      | 210           | 18-100 | 6% [1-16%]   | Serious |
|                               |                                                                                                         | Any Infection | Omicron (BA.1) | Index-Delta                      | 104 [90-119]  | 18-100 | 52% [3-77%]  | Serious |
|                               |                                                                                                         | Any Infection | Omicron (BA.1) | Index-Delta                      | 134 [120-149] | 18-100 | 24% [1-51%]  | Serious |
|                               |                                                                                                         | Any Infection | Omicron (BA.1) | Index-Delta                      | 164 [150-179] | 18-100 | 22% [1-40%]  | Serious |
|                               |                                                                                                         | Any Infection | Omicron (BA.1) | Index-Delta                      | 194 [180-209] | 18-100 | 1% [1-35%]   | Serious |
|                               |                                                                                                         | Any Infection | Omicron (BA.1) | Index-Delta                      | 210           | 18-100 | 5% [1-16%]   | Serious |
| Carazo (Canada) <sup>12</sup> | Test-negative case-control (Adjusted for age, sex, testing-indication and epi-week but not comorbidity) | Any Infection | Omicron        | Alpha (B.1.1.7),Beta,Gamma,Delta | 134 [90-179]  | 12-100 | 67% [57-74%] | Serious |
|                               |                                                                                                         | Any Infection | Omicron        | Alpha (B.1.1.7),Beta,Gamma,Delta | 455 [180-730] | 12-100 | 37% [29-43%] | Serious |
|                               |                                                                                                         | Any Infection | Omicron        | Alpha (B.1.1.7),Beta,Gamma,Delta | 136 [90-182]  | 12-100 | 66% [57-73%] | Serious |
|                               |                                                                                                         | Any Infection | Omicron        | Alpha (B.1.1.7),Beta,Gamma,Delta | 228 [183-274] | 12-100 | 49% [32-61%] | Serious |
|                               |                                                                                                         | Any Infection | Omicron        | Alpha (B.1.1.7),Beta,Gamma,Delta | 320 [275-364] | 12-100 | 35% [21-47%] | Serious |
|                               |                                                                                                         | Any Infection | Omicron        | Alpha (B.1.1.7),Beta,Gamma,Delta | 456 [365-547] | 12-100 | 29% [17-38%] | Serious |
|                               |                                                                                                         | Any Infection | Omicron        | Alpha (B.1.1.7),Beta,Gamma,Delta | 639 [548-730] | 12-100 | 27% [8-42%]  | Serious |
|                               |                                                                                                         | Any Infection | Omicron        | Alpha (B.1.1.7),Beta,Gamma,Delta | 134 [90-179]  | 12-100 | 49% [8-72%]  | Serious |



|                                        |                                                                                                                                                                                           |                                   |         |                                         |               |        |                    |          |
|----------------------------------------|-------------------------------------------------------------------------------------------------------------------------------------------------------------------------------------------|-----------------------------------|---------|-----------------------------------------|---------------|--------|--------------------|----------|
|                                        |                                                                                                                                                                                           | Any Infection                     | Omicron | Alpha (B.1.1.7),Beta,Gamma,Delta        | 455 [180-730] | 12-100 | 1% [1-20%]         | Serious  |
|                                        |                                                                                                                                                                                           | Hospitalization or severe disease | Omicron | Alpha (B.1.1.7),Beta,Gamma,Delta        | 134 [90-179]  | 12-100 | 81% [52-92%]       | Moderate |
|                                        |                                                                                                                                                                                           | Hospitalization or severe disease | Omicron | Alpha (B.1.1.7),Beta,Gamma,Delta        | 455 [180-730] | 12-100 | 62% [36-77%]       | Moderate |
| Cerqueira-Silva (Brazil) <sup>13</sup> | Test-negative case-control (Matched cohorts. Adjusted for matched design, comorbidities, pregnancy, race, days elapsed between tests, hospital admission, and age)                        | Any Infection                     | Omicron | Alpha (B.1.1.7),Delta (B.1.617.2),Gamma | 134 [90-179]  | 18-100 | 52.8% [48.3-56.8%] | Moderate |
|                                        |                                                                                                                                                                                           | Any Infection                     | Omicron | Alpha (B.1.1.7),Delta (B.1.617.2),Gamma | 272 [180-365] | 18-100 | 32.7% [30.2-35.2%] | Moderate |
|                                        |                                                                                                                                                                                           | Any Infection                     | Omicron | Alpha (B.1.1.7),Delta (B.1.617.2),Gamma | 365           | 18-100 | 14.7% [10.8-18.5%] | Moderate |
|                                        |                                                                                                                                                                                           | Hospitalization or severe disease | Omicron | Alpha (B.1.1.7),Delta (B.1.617.2),Gamma | 134 [90-179]  | 18-100 | 84.5% [73.1-91.1%] | Serious  |
|                                        |                                                                                                                                                                                           | Hospitalization or severe disease | Omicron | Alpha (B.1.1.7),Delta (B.1.617.2),Gamma | 272 [180-365] | 18-100 | 89.5% [86-92.2%]   | Serious  |
|                                        |                                                                                                                                                                                           | Hospitalization or severe disease | Omicron | Alpha (B.1.1.7),Delta (B.1.617.2),Gamma | 365           | 18-100 | 80.3% [74.4-84.8%] | Serious  |
| Chin (USA) <sup>14</sup>               | Test-negative case-control (Matched cohorts. Adjusted for age group, and sex)                                                                                                             | Any Infection                     | Omicron | Delta (B.1.617.2)                       | 150           | 18-100 | 54.2% [41.4-66.2%] | Moderate |
|                                        |                                                                                                                                                                                           | Any Infection                     | Omicron | Delta (B.1.617.2)                       | 154           | 18-100 | 60.9% [58.5-67.8%] | Moderate |
| Lind (USA) <sup>15</sup>               | Test-negative case-control (Adjusted for date of test, age (continuous), sex, race/ethnicity, comorbidity score, clinical encounters, insurance group, and regional social vulnerability) | Any Infection                     | Omicron | Mixed variant                           | 328           | 5-100  | 25.3% [16.1-33.5%] | Moderate |
| Michlmayr (Denmark) <sup>16</sup>      | Cohort (Adjusted age, sex, comorbidity, region of affiliation and staying at hospital, vaccination status, and time since vaccination)                                                    | Any Infection                     | Omicron | Mixed variant                           | 134 [90-179]  | 2-100  | 41.7% [40.8-42.6%] | Serious  |
|                                        |                                                                                                                                                                                           | Any Infection                     | Omicron | Mixed variant                           | 224 [180-269] | 2-100  | 18.8% [17.1-20.3%] | Serious  |
|                                        |                                                                                                                                                                                           | Any Infection                     | Omicron | Mixed variant                           | 314 [270-359] | 2-100  | 18.5% [16.9-20.1%] | Serious  |
|                                        |                                                                                                                                                                                           | Any Infection                     | Omicron | Mixed variant                           | 360           | 2-100  | 13.7% [12.3-14.8%] | Serious  |
|                                        |                                                                                                                                                                                           | Any Infection                     | Omicron | Mixed variant                           | 134 [90-179]  | 2-100  | 48.1% [46.3-49.9%] | Serious  |
|                                        |                                                                                                                                                                                           | Any Infection                     | Omicron | Mixed variant                           | 224 [180-269] | 2-100  | 25.3% [22.5-27.9%] | Serious  |
|                                        |                                                                                                                                                                                           | Any Infection                     | Omicron | Mixed variant                           | 314 [270-359] | 2-100  | 25.6% [22.9-28.2%] | Serious  |
|                                        |                                                                                                                                                                                           | Any Infection                     | Omicron | Mixed variant                           | 360           | 2-100  | 20.6% [18.1-22.9%] | Serious  |

|                                   |                                                                                 |                                   |         |                           |               |          |                    |          |
|-----------------------------------|---------------------------------------------------------------------------------|-----------------------------------|---------|---------------------------|---------------|----------|--------------------|----------|
|                                   |                                                                                 | Hospitalization or severe disease | Omicron | Mixed variant             | 90            | 2-100    | 69.8% [51.5-81.2%] | Serious  |
| Nyberg (UK) <sup>17</sup>         | Retrospective cohort (Adjusted for age, sex, and index of multiple deprivation) | Hospitalization or severe disease | Omicron | Index-Delta               | 180           | 18-100   | 45% [37-52%]       | Serious  |
|                                   |                                                                                 | Hospitalization or severe disease | Omicron | Index-Delta               | 180           | 18-100   | 32% [26-38%]       | Serious  |
|                                   |                                                                                 | Hospitalization or severe disease | Omicron | Index-Delta               | 180           | 18-100   | 28% [22-33%]       | Serious  |
|                                   |                                                                                 | Hospitalization or severe disease | Omicron | Index-Delta               | 180           | 18-100   | 82% [43-94%]       | Serious  |
|                                   |                                                                                 | Hospitalization or severe disease | Omicron | Index-Delta               | 180           | 18-100   | 82% [76-89%]       | Serious  |
|                                   |                                                                                 | Hospitalization or severe disease | Omicron | Index-Delta               | 180           | 18-100   | 93% [88-97%]       | Serious  |
|                                   |                                                                                 | Hospitalization or severe disease | Omicron | Index-Delta               | 180           | 18-100   | 94% [90-99%]       | Serious  |
|                                   |                                                                                 | Hospitalization or severe disease | Omicron | Index-Delta               | 180           | 18-100   | 34% [22-54%]       | Serious  |
|                                   |                                                                                 | Hospitalization or severe disease | Omicron | Index-Delta               | 180           | 18-100   | 69% [55-88%]       | Serious  |
|                                   |                                                                                 | Hospitalization or severe disease | Omicron | Index-Delta               | 180           | 18-100   | 84% [72-99%]       | Serious  |
|                                   |                                                                                 | Hospitalization or severe disease | Omicron | Index-Delta               | 180           | 18-100   | 86% [74-100%]      | Serious  |
|                                   |                                                                                 | Hospitalization or severe disease | Omicron | Index-Delta               | 180           | 18-100   | 48% [21-100%]      | Serious  |
|                                   |                                                                                 | Hospitalization or severe disease | Omicron | Index-Delta               | 180           | 18-100   | 54% [47-62%]       | Serious  |
|                                   |                                                                                 | Hospitalization or severe disease | Omicron | Index-Delta               | 180           | 18-100   | 37% [29-44%]       | Serious  |
|                                   |                                                                                 | Hospitalization or severe disease | Omicron | Index-Delta               | 180           | 18-100   | 32% [25-40%]       | Serious  |
| Hospitalization or severe disease | Omicron                                                                         | Index-Delta                       | 180     | 18-100                    | 90% [78-100%] | Serious  |                    |          |
| Šmíd (Czechia) <sup>18</sup>      | Cross-sectional (Adjusted for age group, sex, and calendar time)                | Any Infection                     | Omicron | Delta (B.1.617.2)         | 120 [60-180]  | All ages | 66.3% [66.3-67.3%] | Moderate |
|                                   |                                                                                 | Any Infection                     | Omicron | Delta (B.1.617.2)         | 120 [60-180]  | All ages | 69% [68-69%]       | Moderate |
|                                   |                                                                                 | Any Infection                     | Omicron | Wild-type,Alpha (B.1.1.7) | 241 [181-301] | All ages | 48% [46-50%]       | Moderate |
|                                   |                                                                                 | Any Infection                     | Omicron | Wild-type,Alpha (B.1.1.7) | 362 [302-422] | All ages | 34% [33-35%]       | Moderate |
|                                   |                                                                                 | Any Infection                     | Omicron | Wild-type,Alpha (B.1.1.7) | 423           | All ages | 17% [15-18%]       | Moderate |
|                                   |                                                                                 | Any Infection                     | Omicron | Wild-type,Alpha (B.1.1.7) | 302 [181-423] | All ages | 12.1% [10.3-13.1%] | Moderate |
|                                   |                                                                                 | Hospitalization or severe disease | Omicron | Delta (B.1.617.2)         | 120 [60-180]  | All ages | 73% [55-84%]       | Moderate |
|                                   |                                                                                 | Hospitalization or severe disease | Omicron | Wild-type,Alpha (B.1.1.7) | 302 [181-423] | All ages | 66% [54-75%]       | Moderate |
|                                   |                                                                                 | Hospitalization or severe disease | Omicron | Delta (B.1.617.2)         | 120 [60-180]  | All ages | 80.8% [40-93.9%]   | Moderate |
|                                   |                                                                                 | Hospitalization or severe disease | Omicron | Wild-type,Alpha (B.1.1.7) | 302 [181-423] | All ages | 87.6% [72.2-94.5%] | Moderate |
|                                   |                                                                                 | Hospitalization or severe disease | Omicron | Delta (B.1.617.2)         | 120 [60-180]  | All ages | 82.8% [1-97.6%]    | Moderate |
|                                   |                                                                                 | Hospitalization or severe disease | Omicron | Wild-type,Alpha (B.1.1.7) | 302 [181-423] | All ages | 65.7% [15-86.1%]   | Moderate |

## Appendix 6. Characteristics and results of individual hybrid immunity studies included in meta-analysis

| Author (Country)           | Study Design (Variables controlled for in the hybrid immunity protection estimates)                                   | Exposure vs Comparator                           | Vaccine                                                                               | Severity of Infection             | Reinfection Variant | Prior Infected Variant | Days since Prior Infection/ Vaccination Completion (Median [Range]) | Age Range | Protection [95% CI] | Risk of Bias |
|----------------------------|-----------------------------------------------------------------------------------------------------------------------|--------------------------------------------------|---------------------------------------------------------------------------------------|-----------------------------------|---------------------|------------------------|---------------------------------------------------------------------|-----------|---------------------|--------------|
| Altarawneh 2 (Qatar)(10)   | Test-negative case-control (Matched cohorts. Adjusted for sex, age group, nationality, and calendar week of PCR test) | Infection + 1st booster vaccine vs naive         | Pfizer/BioNTech-Comirnaty                                                             | Any Infection                     | Omicron (BA.1)      | Mixed variant          | 42                                                                  | 0-100     | 74.4% [63.4-82.2%]  | Moderate     |
|                            |                                                                                                                       | Infection + 1st booster vaccine vs naive         | Pfizer/BioNTech-Comirnaty                                                             | Any Infection                     | Omicronn (BA.2)     | Mixed variant          | 43                                                                  | 0-100     | 77.3% [72.4-81.4%]  | Moderate     |
|                            |                                                                                                                       | Infection + 1st booster vaccine vs naive         | Pfizer/BioNTech-Comirnaty                                                             | Hospitalization or severe disease | Omicronn (BA.2)     | Mixed variant          | 43                                                                  | 0-100     | 97.5% [57.6-99.9%]  | Moderate     |
|                            |                                                                                                                       | Infection + full primary series vaccine vs naive | Pfizer/BioNTech-Comirnaty                                                             | Any Infection                     | Omicronn (BA.1)     | Mixed variant          | 268                                                                 | 0-100     | 51.7% [43.5-58.7%]  | Moderate     |
|                            |                                                                                                                       | Infection + full primary series vaccine vs naive | Pfizer/BioNTech-Comirnaty                                                             | Any Infection                     | Omicronn (BA.2)     | Mixed variant          | 270                                                                 | 0-100     | 55.1% [50.9-58.9%]  | Moderate     |
|                            |                                                                                                                       | Infection + full primary series vaccine vs naive | Pfizer/BioNTech-Comirnaty                                                             | Hospitalization or severe disease | Omicronn (BA.2)     | Mixed variant          | 270                                                                 | 0-100     | 97.8% [82.6-99.7%]  | Moderate     |
|                            |                                                                                                                       | Infection + full primary series vaccine vs naive | Pfizer/BioNTech-Comirnaty                                                             | Hospitalization or severe disease | Omicronn (BA.1)     | Mixed variant          | 268                                                                 | 0-100     | 96.2% [37.7-99.8%]  | Moderate     |
| Andeweg (Netherlands) (11) | Test-negative case-control (Adjusted for age, sex, health region, and testing date)                                   | Infection + 1st booster vaccine vs naive         | Pfizer/BioNTech-Comirnaty,Moderna-mRNA-1273,AstraZeneca-Vaxzevria,Janssen-Ad26.COV2.S | Any Infection                     | Omicron (BA.1)      | Mixed variant          | 104 [90-119]                                                        | 18-100    | 66% [46-79%]        | Serious      |
|                            |                                                                                                                       | Infection + 1st booster vaccine vs naive         | Pfizer/BioNTech-Comirnaty,Moderna-mRNA-1273,AstraZeneca-Vaxzevria,Janssen-Ad26.COV2.S | Any Infection                     | Omicron (BA.1)      | Mixed variant          | 104 [90-119]                                                        | 18-100    | 70% [50-82%]        | Serious      |
|                            |                                                                                                                       | Infection + 1st booster vaccine vs naive         | Pfizer/BioNTech-Comirnaty,Moderna-mRNA-1273,AstraZeneca-Vaxzevria,Janssen-Ad26.COV2.S | Any Infection                     | Omicron (BA.2)      | Mixed variant          | 104 [90-119]                                                        | 18-100    | 75% [67-81%]        | Serious      |
|                            |                                                                                                                       | Infection + 1st booster vaccine vs naive         | Pfizer/BioNTech-Comirnaty,Moderna-mRNA-1273,AstraZeneca-Vaxzevria,Janssen-Ad26.COV2.S | Any Infection                     | Omicron (BA.2)      | Mixed variant          | 104 [90-119]                                                        | 18-100    | 74% [66-80%]        | Serious      |

|  |  |                                                  |                                                                                       |               |                |                   |               |        |              |         |
|--|--|--------------------------------------------------|---------------------------------------------------------------------------------------|---------------|----------------|-------------------|---------------|--------|--------------|---------|
|  |  | Infection + full primary series vaccine vs naive | Pfizer/BioNTech-Comirnaty,Moderna-mRNA-1273,AstraZeneca-Vaxzevria,Janssen-Ad26.COV2.S | Any Infection | Omicron (BA.1) | Delta (B.1.617.2) | 134 [120-149] | 18-100 | 85% [82-87%] | Serious |
|  |  | Infection + full primary series vaccine vs naive | Pfizer/BioNTech-Comirnaty,Moderna-mRNA-1273,AstraZeneca-Vaxzevria,Janssen-Ad26.COV2.S | Any Infection | Omicron (BA.1) | Delta (B.1.617.2) | 164 [150-179] | 18-100 | 81% [75-86%] | Serious |
|  |  | Infection + full primary series vaccine vs naive | Pfizer/BioNTech-Comirnaty,Moderna-mRNA-1273,AstraZeneca-Vaxzevria,Janssen-Ad26.COV2.S | Any Infection | Omicron (BA.1) | Delta (B.1.617.2) | 104 [90-119]  | 18-100 | 66% [53-75%] | Serious |
|  |  | Infection + full primary series vaccine vs naive | Pfizer/BioNTech-Comirnaty,Moderna-mRNA-1273,AstraZeneca-Vaxzevria,Janssen-Ad26.COV2.S | Any Infection | Omicron (BA.1) | Delta (B.1.617.2) | 134 [120-149] | 18-100 | 67% [52-77%] | Serious |
|  |  | Infection + full primary series vaccine vs naive | Pfizer/BioNTech-Comirnaty,Moderna-mRNA-1273,AstraZeneca-Vaxzevria,Janssen-Ad26.COV2.S | Any Infection | Omicron (BA.1) | Delta (B.1.617.2) | 164 [150-179] | 18-100 | 68% [50-79%] | Serious |
|  |  | Infection + full primary series vaccine vs naive | Pfizer/BioNTech-Comirnaty,Moderna-mRNA-1273,AstraZeneca-Vaxzevria,Janssen-Ad26.COV2.S | Any Infection | Omicron (BA.1) | Delta (B.1.617.2) | 194 [180-209] | 18-100 | 82% [79-85%] | Serious |
|  |  | Infection + full primary series vaccine vs naive | Pfizer/BioNTech-Comirnaty,Moderna-mRNA-1273,AstraZeneca-Vaxzevria,Janssen-Ad26.COV2.S | Any Infection | Omicron (BA.1) | Delta (B.1.617.2) | 210           | 18-100 | 82% [75-88%] | Serious |
|  |  | Infection + full primary series vaccine vs naive | Pfizer/BioNTech-Comirnaty,Moderna-mRNA-1273,AstraZeneca-Vaxzevria,Janssen-Ad26.COV2.S | Any Infection | Omicron (BA.1) | Delta (B.1.617.2) | 104 [90-119]  | 18-100 | 66% [52-76%] | Serious |
|  |  | Infection + full primary series vaccine vs naive | Pfizer/BioNTech-Comirnaty,Moderna-mRNA-1273,AstraZeneca-Vaxzevria,Janssen-Ad26.COV2.S | Any Infection | Omicron (BA.1) | Delta (B.1.617.2) | 134 [120-149] | 18-100 | 69% [52-80%] | Serious |
|  |  | Infection + full primary series vaccine vs naive | Pfizer/BioNTech-Comirnaty,Moderna-mRNA-1273,AstraZeneca-Vaxzevria,Janssen-Ad26.COV2.S | Any Infection | Omicron (BA.1) | Delta (B.1.617.2) | 164 [150-179] | 18-100 | 72% [54-83%] | Serious |

|  |  |                                                  |                                                                                       |               |                |                   |               |        |              |         |
|--|--|--------------------------------------------------|---------------------------------------------------------------------------------------|---------------|----------------|-------------------|---------------|--------|--------------|---------|
|  |  | Infection + full primary series vaccine vs naive | Pfizer/BioNTech-Comirnaty,Moderna-mRNA-1273,AstraZeneca-Vaxzevria,Janssen-Ad26.COV2.S | Any Infection | Omicron (BA.2) | Delta (B.1.617.2) | 194 [180-209] | 18-100 | 84% [81-86%] | Serious |
|  |  | Infection + full primary series vaccine vs naive | Pfizer/BioNTech-Comirnaty,Moderna-mRNA-1273,AstraZeneca-Vaxzevria,Janssen-Ad26.COV2.S | Any Infection | Omicron (BA.2) | Delta (B.1.617.2) | 210           | 18-100 | 85% [80-89%] | Serious |
|  |  | Infection + full primary series vaccine vs naive | Pfizer/BioNTech-Comirnaty,Moderna-mRNA-1273,AstraZeneca-Vaxzevria,Janssen-Ad26.COV2.S | Any Infection | Omicron (BA.2) | Delta (B.1.617.2) | 104 [90-119]  | 18-100 | 77% [66-85%] | Serious |
|  |  | Infection + full primary series vaccine vs naive | Pfizer/BioNTech-Comirnaty,Moderna-mRNA-1273,AstraZeneca-Vaxzevria,Janssen-Ad26.COV2.S | Any Infection | Omicron (BA.2) | Delta (B.1.617.2) | 194 [180-209] | 18-100 | 64% [43-77%] | Serious |
|  |  | Infection + full primary series vaccine vs naive | Pfizer/BioNTech-Comirnaty,Moderna-mRNA-1273,AstraZeneca-Vaxzevria,Janssen-Ad26.COV2.S | Any Infection | Omicron (BA.2) | Delta (B.1.617.2) | 210           | 18-100 | 48% [26-64%] | Serious |
|  |  | Infection + full primary series vaccine vs naive | Pfizer/BioNTech-Comirnaty,Moderna-mRNA-1273,AstraZeneca-Vaxzevria,Janssen-Ad26.COV2.S | Any Infection | Omicron (BA.2) | Delta (B.1.617.2) | 194 [180-209] | 18-100 | 84% [81-87%] | Serious |
|  |  | Infection + full primary series vaccine vs naive | Pfizer/BioNTech-Comirnaty,Moderna-mRNA-1273,AstraZeneca-Vaxzevria,Janssen-Ad26.COV2.S | Any Infection | Omicron (BA.2) | Delta (B.1.617.2) | 210           | 18-100 | 85% [80-89%] | Serious |
|  |  | Infection + full primary series vaccine vs naive | Pfizer/BioNTech-Comirnaty,Moderna-mRNA-1273,AstraZeneca-Vaxzevria,Janssen-Ad26.COV2.S | Any Infection | Omicron (BA.2) | Delta (B.1.617.2) | 104 [90-119]  | 18-100 | 76% [63-84%] | Serious |
|  |  | Infection + full primary series vaccine vs naive | Pfizer/BioNTech-Comirnaty,Moderna-mRNA-1273,AstraZeneca-Vaxzevria,Janssen-Ad26.COV2.S | Any Infection | Omicron (BA.2) | Delta (B.1.617.2) | 134 [120-149] | 18-100 | 65% [43-78%] | Serious |
|  |  | Infection + full primary series vaccine vs naive | Pfizer/BioNTech-Comirnaty,Moderna-mRNA-1273,AstraZeneca-Vaxzevria,Janssen-Ad26.COV2.S | Any Infection | Omicron (BA.2) | Delta (B.1.617.2) | 164 [150-179] | 18-100 | 51% [28-67%] | Serious |

|  |  |                                                  |                                                                                       |               |                |                                             |               |        |              |         |
|--|--|--------------------------------------------------|---------------------------------------------------------------------------------------|---------------|----------------|---------------------------------------------|---------------|--------|--------------|---------|
|  |  | Infection + full primary series vaccine vs naive | Pfizer/BioNTech-Comirnaty,Moderna-mRNA-1273,AstraZeneca-Vaxzevria,Janssen-Ad26.COV2.S | Any Infection | Omicron (BA.1) | Wild-type,Alpha (B.1.1.7),Delta (B.1.617.2) | 194 [180-209] | 18-100 | 68% [57-75%] | Serious |
|  |  | Infection + full primary series vaccine vs naive | Pfizer/BioNTech-Comirnaty,Moderna-mRNA-1273,AstraZeneca-Vaxzevria,Janssen-Ad26.COV2.S | Any Infection | Omicron (BA.1) | Wild-type,Alpha (B.1.1.7),Delta (B.1.617.2) | 210           | 18-100 | 60% [44-71%] | Serious |
|  |  | Infection + full primary series vaccine vs naive | Pfizer/BioNTech-Comirnaty,Moderna-mRNA-1273,AstraZeneca-Vaxzevria,Janssen-Ad26.COV2.S | Any Infection | Omicron (BA.1) | Wild-type,Alpha (B.1.1.7),Delta (B.1.617.2) | 104 [90-119]  | 18-100 | 61% [47-71%] | Serious |
|  |  | Infection + full primary series vaccine vs naive | Pfizer/BioNTech-Comirnaty,Moderna-mRNA-1273,AstraZeneca-Vaxzevria,Janssen-Ad26.COV2.S | Any Infection | Omicron (BA.1) | Wild-type,Alpha (B.1.1.7),Delta (B.1.617.2) | 134 [120-149] | 18-100 | 56% [46-64%] | Serious |
|  |  | Infection + full primary series vaccine vs naive | Pfizer/BioNTech-Comirnaty,Moderna-mRNA-1273,AstraZeneca-Vaxzevria,Janssen-Ad26.COV2.S | Any Infection | Omicron (BA.1) | Wild-type,Alpha (B.1.1.7),Delta (B.1.617.2) | 164 [150-179] | 18-100 | 63% [55-70%] | Serious |
|  |  | Infection + full primary series vaccine vs naive | Pfizer/BioNTech-Comirnaty,Moderna-mRNA-1273,AstraZeneca-Vaxzevria,Janssen-Ad26.COV2.S | Any Infection | Omicron (BA.1) | Wild-type,Alpha (B.1.1.7),Delta (B.1.617.2) | 194 [180-209] | 18-100 | 68% [56-77%] | Serious |
|  |  | Infection + full primary series vaccine vs naive | Pfizer/BioNTech-Comirnaty,Moderna-mRNA-1273,AstraZeneca-Vaxzevria,Janssen-Ad26.COV2.S | Any Infection | Omicron (BA.1) | Wild-type,Alpha (B.1.1.7),Delta (B.1.617.2) | 134 [120-149] | 18-100 | 53% [32-67%] | Serious |
|  |  | Infection + full primary series vaccine vs naive | Pfizer/BioNTech-Comirnaty,Moderna-mRNA-1273,AstraZeneca-Vaxzevria,Janssen-Ad26.COV2.S | Any Infection | Omicron (BA.1) | Wild-type,Alpha (B.1.1.7),Delta (B.1.617.2) | 164 [150-179] | 18-100 | 52% [32-66%] | Serious |
|  |  | Infection + full primary series vaccine vs naive | Pfizer/BioNTech-Comirnaty,Moderna-mRNA-1273,AstraZeneca-Vaxzevria,Janssen-Ad26.COV2.S | Any Infection | Omicron (BA.1) | Wild-type,Alpha (B.1.1.7),Delta (B.1.617.2) | 104 [90-119]  | 18-100 | 52% [39-62%] | Serious |
|  |  | Infection + full primary series vaccine vs naive | Pfizer/BioNTech-Comirnaty,Moderna-mRNA-1273,AstraZeneca-Vaxzevria,Janssen-Ad26.COV2.S | Any Infection | Omicron (BA.1) | Wild-type,Alpha (B.1.1.7),Delta (B.1.617.2) | 134 [120-149] | 18-100 | 63% [54-70%] | Serious |

|  |  |                                                  |                                                                                       |               |                |                                             |               |        |              |         |
|--|--|--------------------------------------------------|---------------------------------------------------------------------------------------|---------------|----------------|---------------------------------------------|---------------|--------|--------------|---------|
|  |  | Infection + full primary series vaccine vs naive | Pfizer/BioNTech-Comirnaty,Moderna-mRNA-1273,AstraZeneca-Vaxzevria,Janssen-Ad26.COV2.S | Any Infection | Omicron (BA.2) | Wild-type,Alpha (B.1.1.7),Delta (B.1.617.2) | 164 [150-179] | 18-100 | 76% [64-84%] | Serious |
|  |  | Infection + full primary series vaccine vs naive | Pfizer/BioNTech-Comirnaty,Moderna-mRNA-1273,AstraZeneca-Vaxzevria,Janssen-Ad26.COV2.S | Any Infection | Omicron (BA.2) | Wild-type,Alpha (B.1.1.7),Delta (B.1.617.2) | 194 [180-209] | 18-100 | 69% [52-80%] | Serious |
|  |  | Infection + full primary series vaccine vs naive | Pfizer/BioNTech-Comirnaty,Moderna-mRNA-1273,AstraZeneca-Vaxzevria,Janssen-Ad26.COV2.S | Any Infection | Omicron (BA.2) | Wild-type,Alpha (B.1.1.7),Delta (B.1.617.2) | 210           | 18-100 | 69% [50-81%] | Serious |
|  |  | Infection + full primary series vaccine vs naive | Pfizer/BioNTech-Comirnaty,Moderna-mRNA-1273,AstraZeneca-Vaxzevria,Janssen-Ad26.COV2.S | Any Infection | Omicron (BA.2) | Wild-type,Alpha (B.1.1.7),Delta (B.1.617.2) | 104 [90-119]  | 18-100 | 62% [46-73%] | Serious |
|  |  | Infection + full primary series vaccine vs naive | Pfizer/BioNTech-Comirnaty,Moderna-mRNA-1273,AstraZeneca-Vaxzevria,Janssen-Ad26.COV2.S | Any Infection | Omicron (BA.2) | Wild-type,Alpha (B.1.1.7),Delta (B.1.617.2) | 134 [120-149] | 18-100 | 67% [58-74%] | Serious |
|  |  | Infection + full primary series vaccine vs naive | Pfizer/BioNTech-Comirnaty,Moderna-mRNA-1273,AstraZeneca-Vaxzevria,Janssen-Ad26.COV2.S | Any Infection | Omicron (BA.2) | Wild-type,Alpha (B.1.1.7),Delta (B.1.617.2) | 164 [150-179] | 18-100 | 77% [64-85%] | Serious |
|  |  | Infection + full primary series vaccine vs naive | Pfizer/BioNTech-Comirnaty,Moderna-mRNA-1273,AstraZeneca-Vaxzevria,Janssen-Ad26.COV2.S | Any Infection | Omicron (BA.2) | Wild-type,Alpha (B.1.1.7),Delta (B.1.617.2) | 194 [180-209] | 18-100 | 67% [47-79%] | Serious |
|  |  | Infection + full primary series vaccine vs naive | Pfizer/BioNTech-Comirnaty,Moderna-mRNA-1273,AstraZeneca-Vaxzevria,Janssen-Ad26.COV2.S | Any Infection | Omicron (BA.2) | Wild-type,Alpha (B.1.1.7),Delta (B.1.617.2) | 210           | 18-100 | 65% [40-79%] | Serious |
|  |  | Infection + full primary series vaccine vs naive | Pfizer/BioNTech-Comirnaty,Moderna-mRNA-1273,AstraZeneca-Vaxzevria,Janssen-Ad26.COV2.S | Any Infection | Omicron (BA.2) | Wild-type,Alpha (B.1.1.7),Delta (B.1.617.2) | 104 [90-119]  | 18-100 | 62% [44-74%] | Serious |
|  |  | Infection + full primary series vaccine vs naive | Pfizer/BioNTech-Comirnaty,Moderna-mRNA-1273,AstraZeneca-Vaxzevria,Janssen-Ad26.COV2.S | Any Infection | Omicron (BA.2) | Wild-type,Alpha (B.1.1.7),Delta (B.1.617.2) | 134 [120-149] | 18-100 | 67% [57-74%] | Serious |

|  |  |                                                  |                                                                                       |               |                |                   |               |        |              |         |
|--|--|--------------------------------------------------|---------------------------------------------------------------------------------------|---------------|----------------|-------------------|---------------|--------|--------------|---------|
|  |  | Infection + full primary series vaccine vs naive | Pfizer/BioNTech-Comirnaty,Moderna-mRNA-1273,AstraZeneca-Vaxzevria,Janssen-Ad26.COV2.S | Any Infection | Omicron (BA.1) | Delta (B.1.617.2) | 164 [150-179] | 18-100 | 42% [23-57%] | Serious |
|  |  | Infection + full primary series vaccine vs naive | Pfizer/BioNTech-Comirnaty,Moderna-mRNA-1273,AstraZeneca-Vaxzevria,Janssen-Ad26.COV2.S | Any Infection | Omicron (BA.1) | Delta (B.1.617.2) | 194 [180-209] | 18-100 | 35% [9-53%]  | Serious |
|  |  | Infection + full primary series vaccine vs naive | Pfizer/BioNTech-Comirnaty,Moderna-mRNA-1273,AstraZeneca-Vaxzevria,Janssen-Ad26.COV2.S | Any Infection | Omicron (BA.1) | Delta (B.1.617.2) | 210           | 18-100 | 39% [20-53%] | Serious |
|  |  | Infection + full primary series vaccine vs naive | Pfizer/BioNTech-Comirnaty,Moderna-mRNA-1273,AstraZeneca-Vaxzevria,Janssen-Ad26.COV2.S | Any Infection | Omicron (BA.1) | Delta (B.1.617.2) | 104 [90-119]  | 18-100 | 36% [1-63%]  | Serious |
|  |  | Infection + full primary series vaccine vs naive | Pfizer/BioNTech-Comirnaty,Moderna-mRNA-1273,AstraZeneca-Vaxzevria,Janssen-Ad26.COV2.S | Any Infection | Omicron (BA.1) | Delta (B.1.617.2) | 134 [120-149] | 18-100 | 79% [1-97%]  | Serious |
|  |  | Infection + full primary series vaccine vs naive | Pfizer/BioNTech-Comirnaty,Moderna-mRNA-1273,AstraZeneca-Vaxzevria,Janssen-Ad26.COV2.S | Any Infection | Omicron (BA.1) | Delta (B.1.617.2) | 164 [150-179] | 18-100 | 41% [14-60%] | Serious |
|  |  | Infection + full primary series vaccine vs naive | Pfizer/BioNTech-Comirnaty,Moderna-mRNA-1273,AstraZeneca-Vaxzevria,Janssen-Ad26.COV2.S | Any Infection | Omicron (BA.1) | Delta (B.1.617.2) | 194 [180-209] | 18-100 | 35% [1-59%]  | Serious |
|  |  | Infection + full primary series vaccine vs naive | Pfizer/BioNTech-Comirnaty,Moderna-mRNA-1273,AstraZeneca-Vaxzevria,Janssen-Ad26.COV2.S | Any Infection | Omicron (BA.1) | Delta (B.1.617.2) | 210           | 18-100 | 28% [1-48%]  | Serious |
|  |  | Infection + full primary series vaccine vs naive | Pfizer/BioNTech-Comirnaty,Moderna-mRNA-1273,AstraZeneca-Vaxzevria,Janssen-Ad26.COV2.S | Any Infection | Omicron (BA.1) | Delta (B.1.617.2) | 164 [150-179] | 18-100 | 1% [1-44%]   | Serious |
|  |  | Infection + full primary series vaccine vs naive | Pfizer/BioNTech-Comirnaty,Moderna-mRNA-1273,AstraZeneca-Vaxzevria,Janssen-Ad26.COV2.S | Any Infection | Omicron (BA.1) | Delta (B.1.617.2) | 210           | 18-100 | 51% [1-94%]  | Serious |



|  |  |                                                  |                                                                                       |               |                |                                             |               |        |              |         |
|--|--|--------------------------------------------------|---------------------------------------------------------------------------------------|---------------|----------------|---------------------------------------------|---------------|--------|--------------|---------|
|  |  | Infection + full primary series vaccine vs naive | Pfizer/BioNTech-Comirnaty,Moderna-mRNA-1273,AstraZeneca-Vaxzevria,Janssen-Ad26.COV2.S | Any Infection | Omicron (BA.1) | Wild-type,Alpha (B.1.1.7),Delta (B.1.617.2) | 104 [90-119]  | 18-100 | 55% [28-72%] | Serious |
|  |  | Infection + full primary series vaccine vs naive | Pfizer/BioNTech-Comirnaty,Moderna-mRNA-1273,AstraZeneca-Vaxzevria,Janssen-Ad26.COV2.S | Any Infection | Omicron (BA.1) | Wild-type,Alpha (B.1.1.7),Delta (B.1.617.2) | 134 [120-149] | 18-100 | 48% [30-62%] | Serious |
|  |  | Infection + full primary series vaccine vs naive | Pfizer/BioNTech-Comirnaty,Moderna-mRNA-1273,AstraZeneca-Vaxzevria,Janssen-Ad26.COV2.S | Any Infection | Omicron (BA.1) | Wild-type,Alpha (B.1.1.7),Delta (B.1.617.2) | 134 [120-149] | 18-100 | 40% [25-52%] | Serious |
|  |  | Infection + full primary series vaccine vs naive | Pfizer/BioNTech-Comirnaty,Moderna-mRNA-1273,AstraZeneca-Vaxzevria,Janssen-Ad26.COV2.S | Any Infection | Omicron (BA.1) | Wild-type,Alpha (B.1.1.7),Delta (B.1.617.2) | 194 [180-209] | 18-100 | 59% [43-70%] | Serious |
|  |  | Infection + full primary series vaccine vs naive | Pfizer/BioNTech-Comirnaty,Moderna-mRNA-1273,AstraZeneca-Vaxzevria,Janssen-Ad26.COV2.S | Any Infection | Omicron (BA.1) | Wild-type,Alpha (B.1.1.7),Delta (B.1.617.2) | 210           | 18-100 | 50% [26-66%] | Serious |
|  |  | Infection + full primary series vaccine vs naive | Pfizer/BioNTech-Comirnaty,Moderna-mRNA-1273,AstraZeneca-Vaxzevria,Janssen-Ad26.COV2.S | Any Infection | Omicron (BA.1) | Wild-type,Alpha (B.1.1.7),Delta (B.1.617.2) | 104 [90-119]  | 18-100 | 46% [8-69%]  | Serious |
|  |  | Infection + full primary series vaccine vs naive | Pfizer/BioNTech-Comirnaty,Moderna-mRNA-1273,AstraZeneca-Vaxzevria,Janssen-Ad26.COV2.S | Any Infection | Omicron (BA.1) | Wild-type,Alpha (B.1.1.7),Delta (B.1.617.2) | 104 [90-119]  | 18-100 | 50% [27-66%] | Serious |
|  |  | Infection + full primary series vaccine vs naive | Pfizer/BioNTech-Comirnaty,Moderna-mRNA-1273,AstraZeneca-Vaxzevria,Janssen-Ad26.COV2.S | Any Infection | Omicron (BA.1) | Wild-type,Alpha (B.1.1.7),Delta (B.1.617.2) | 164 [150-179] | 18-100 | 44% [26-58%] | Serious |
|  |  | Infection + full primary series vaccine vs naive | Pfizer/BioNTech-Comirnaty,Moderna-mRNA-1273,AstraZeneca-Vaxzevria,Janssen-Ad26.COV2.S | Any Infection | Omicron (BA.1) | Wild-type,Alpha (B.1.1.7),Delta (B.1.617.2) | 194 [180-209] | 18-100 | 58% [40-71%] | Serious |
|  |  | Infection + full primary series vaccine vs naive | Pfizer/BioNTech-Comirnaty,Moderna-mRNA-1273,AstraZeneca-Vaxzevria,Janssen-Ad26.COV2.S | Any Infection | Omicron (BA.1) | Wild-type,Alpha (B.1.1.7),Delta (B.1.617.2) | 210           | 18-100 | 47% [18-66%] | Serious |

|                     |                                                                                                         |                                                        |                                                                   |                                   |                |                                  |              |        |                    |          |
|---------------------|---------------------------------------------------------------------------------------------------------|--------------------------------------------------------|-------------------------------------------------------------------|-----------------------------------|----------------|----------------------------------|--------------|--------|--------------------|----------|
| Björk (Sweden)(19)  | Traditional case-control (Age and sex matched case and control cohorts. Adjusted for for comorbidities) | Infection + full primary series vaccine vs naive       | Pfizer/BioNTech-Comirnaty,Moderna-mRNA-1273,AstraZeneca-Vaxzevria | Hospitalization or severe disease | Omicron (BA.1) | Index-Delta                      | 94 [7-180]   | 0-100  | 91% [57-98%]       | Serious  |
|                     |                                                                                                         | Infection + full primary series vaccine vs naive       | Pfizer/BioNTech-Comirnaty,Moderna-mRNA-1273,AstraZeneca-Vaxzevria | Hospitalization or severe disease | Omicron (BA.2) | Index-Delta                      | 94 [7-180]   | 0-100  | 53% [1-82%]        | Serious  |
|                     |                                                                                                         | Infection + full primary series vaccine vs naive       | Pfizer/BioNTech-Comirnaty,Moderna-mRNA-1273,AstraZeneca-Vaxzevria | Hospitalization or severe disease | Omicron        | Index-Delta                      | 94 [7-180]   | 0-100  | 92% [59-98%]       | Serious  |
| Bruel (France)(20)  | Cohort (No adjustment)                                                                                  | Infection + 1st booster vaccine vs 1st booster vaccine | Pfizer/BioNTech-Comirnaty,Moderna-mRNA-1273,                      | Any Infection                     | Omicron        | Mixed variant                    | 90           | 72-101 | 89% [29-98%]       | Serious  |
| Carazo (Canada)(12) | Test-negative case-control (Adjusted for age, sex, testing-indication and epi-week but not comorbidity) | Infection + 1st booster vaccine vs naive               | Pfizer/BioNTech-Comirnaty,Moderna-mRNA-1273                       | Any Infection                     | Omicron        | Alpha (B.1.1.7),Beta,Gamma,Delta | 7            | 12-100 | 83% [81-84%]       | Serious  |
|                     |                                                                                                         | Infection + 1st booster vaccine vs naive               | Pfizer/BioNTech-Comirnaty,Moderna-mRNA-1273                       | Any Infection                     | Omicron        | Alpha (B.1.1.7),Beta,Gamma,Delta | 120 [60-179] | 12-100 | 80% [76-84%]       | Serious  |
|                     |                                                                                                         | Infection + 1st booster vaccine vs naive               | Pfizer/BioNTech-Comirnaty,Moderna-mRNA-1273                       | Any Infection                     | Omicron        | Alpha (B.1.1.7),Beta,Gamma,Delta | 34 [7-60]    | 12-100 | 83% [81-84%]       | Serious  |
|                     |                                                                                                         | Infection + 1st booster vaccine vs naive               | Pfizer/BioNTech-Comirnaty,Moderna-mRNA-1273                       | Hospitalization or severe disease | Omicron        | Alpha (B.1.1.7),Beta,Gamma,Delta | 7            | 12-100 | 99% [84.5-99.9%]   | Moderate |
|                     |                                                                                                         | Infection + 1st booster vaccine vs naive               | Pfizer/BioNTech-Comirnaty,Moderna-mRNA-1273                       | Hospitalization or severe disease | Omicron        | Alpha (B.1.1.7),Beta,Gamma,Delta | 7            | 12-100 | 99.9% [95.3-98.9%] | Moderate |
|                     |                                                                                                         | Infection + 1st booster vaccine vs naive               | Pfizer/BioNTech-Comirnaty,Moderna-mRNA-1273                       | Hospitalization or severe disease | Omicron        | Alpha (B.1.1.7),Beta,Gamma,Delta | 7            | 12-100 | 97% [94-99%]       | Moderate |
|                     |                                                                                                         | Infection + full primary series vaccine vs naive       | Pfizer/BioNTech-Comirnaty,Moderna-mRNA-1273                       | Any Infection                     | Omicron        | Alpha (B.1.1.7),Beta,Gamma,Delta | 7            | 12-100 | 68% [67-70%]       | Serious  |
|                     |                                                                                                         | Infection + full primary series vaccine vs naive       | Pfizer/BioNTech-Comirnaty,Moderna-mRNA-1273                       | Any Infection                     | Omicron        | Alpha (B.1.1.7),Beta,Gamma,Delta | 34 [7-60]    | 12-100 | 82% [80-84%]       | Serious  |
|                     |                                                                                                         | Infection + full primary series vaccine vs naive       | Pfizer/BioNTech-Comirnaty,Moderna-mRNA-1273                       | Any Infection                     | Omicron        | Alpha (B.1.1.7),Beta,Gamma,Delta | 120 [60-179] | 12-100 | 67% [65-68%]       | Serious  |

|  |  |                                                                            |                                             |                                   |         |                                  |               |        |                    |          |
|--|--|----------------------------------------------------------------------------|---------------------------------------------|-----------------------------------|---------|----------------------------------|---------------|--------|--------------------|----------|
|  |  | Infection + full primary series vaccine vs naive                           | Pfizer/BioNTech-Comirnaty,Moderna-mRNA-1273 | Any Infection                     | Omicron | Alpha (B.1.1.7),Beta,Gamma,Delta | 224 [180-269] | 12-100 | 63% [60-65%]       | Serious  |
|  |  | Infection + full primary series vaccine vs naive                           | Pfizer/BioNTech-Comirnaty,Moderna-mRNA-1273 | Any Infection                     | Omicron | Alpha (B.1.1.7),Beta,Gamma,Delta | 314 [270-359] | 12-100 | 62% [42-75%]       | Serious  |
|  |  | Infection + full primary series vaccine vs naive                           | Pfizer/BioNTech-Comirnaty,Moderna-mRNA-1273 | Hospitalization or severe disease | Omicron | Alpha (B.1.1.7),Beta,Gamma,Delta | 7             | 12-100 | 99.6% [93.3-100%]  | Moderate |
|  |  | Infection + full primary series vaccine vs naive                           | Pfizer/BioNTech-Comirnaty,Moderna-mRNA-1273 | Hospitalization or severe disease | Omicron | Alpha (B.1.1.7),Beta,Gamma,Delta | 97            | 12-100 | 86.3% [1-99.1%]    | Moderate |
|  |  | Infection + full primary series vaccine vs naive                           | Pfizer/BioNTech-Comirnaty,Moderna-mRNA-1273 | Hospitalization or severe disease | Omicron | Alpha (B.1.1.7),Beta,Gamma,Delta | 97            | 12-100 | 99.8% [67.3-99.4%] | Moderate |
|  |  | Infection + full primary series vaccine vs naive                           | Pfizer/BioNTech-Comirnaty,Moderna-mRNA-1273 | Hospitalization or severe disease | Omicron | Alpha (B.1.1.7),Beta,Gamma,Delta | 7             | 12-100 | 94% [91-96%]       | Moderate |
|  |  | Infection + full primary series vaccine vs naive                           | Pfizer/BioNTech-Comirnaty,Moderna-mRNA-1273 | Hospitalization or severe disease | Omicron | Alpha (B.1.1.7),Beta,Gamma,Delta | 7             | 12-100 | 99.9% [95.1-97.9%] | Moderate |
|  |  | Infection + 1st booster vaccine vs infection                               | Pfizer/BioNTech-Comirnaty,Moderna-mRNA-1273 | Any Infection                     | Omicron | Alpha (B.1.1.7),Beta,Gamma,Delta | 7             | 12-100 | 69.4% [66.1-72.3%] | Serious  |
|  |  | Infection + 1st booster vaccine vs infection                               | Pfizer/BioNTech-Comirnaty,Moderna-mRNA-1273 | Hospitalization or severe disease | Omicron | Alpha (B.1.1.7),Beta,Gamma,Delta | 7             | 12-100 | 82.3% [55.5-92.9%] | Moderate |
|  |  | Infection + full primary series vaccine vs infection                       | Pfizer/BioNTech-Comirnaty,Moderna-mRNA-1273 | Any Infection                     | Omicron | Alpha (B.1.1.7),Beta,Gamma,Delta | 7             | 12-100 | 29.1% [22.8-34.9%] | Serious  |
|  |  | Infection + full primary series vaccine vs infection                       | Pfizer/BioNTech-Comirnaty,Moderna-mRNA-1273 | Hospitalization or severe disease | Omicron | Alpha (B.1.1.7),Beta,Gamma,Delta | 7             | 12-100 | 74.6% [49.8-87.2%] | Moderate |
|  |  | Infection + full primary series vaccine vs infection                       | Pfizer/BioNTech-Comirnaty,Moderna-mRNA-1273 | Hospitalization or severe disease | Omicron | Alpha (B.1.1.7),Beta,Gamma,Delta | 97            | 12-100 | 63.9% [1-95.3%]    | Moderate |
|  |  | Infection + 1st booster vaccine vs infection + full primary series vaccine | Pfizer/BioNTech-Comirnaty,Moderna-mRNA-1273 | Any Infection                     | Omicron | Alpha (B.1.1.7),Beta,Gamma,Delta | 7             | 12-100 | 56.8% [53.6-59.7%] | Serious  |

|                              |                                                                                                                                                                    |                                                                            |                                             |                                   |         |                                  |            |        |                    |          |
|------------------------------|--------------------------------------------------------------------------------------------------------------------------------------------------------------------|----------------------------------------------------------------------------|---------------------------------------------|-----------------------------------|---------|----------------------------------|------------|--------|--------------------|----------|
|                              |                                                                                                                                                                    | Infection + 1st booster vaccine vs infection + full primary series vaccine | Pfizer/BioNTech-Comirnaty,Moderna-mRNA-1273 | Hospitalization or severe disease | Omicron | Alpha (B.1.1.7),Beta,Gamma,Delta | 7          | 12-100 | 30.1% [1-70%]      | Moderate |
| Cerqueira-Silva (Brazil)(13) | Test-negative case-control (Matched cohorts. Adjusted for matched design, comorbidities, pregnancy, race, days elapsed between tests, hospital admission, and age) | Infection + 1st booster vaccine vs naive                                   | AstraZeneca-Vaxzevria                       | Any Infection                     | Omicron | Mixed variant                    | 70         | 18-100 | 50.8% [48.9-52.7%] | Moderate |
|                              |                                                                                                                                                                    | Infection + 1st booster vaccine vs naive                                   | AstraZeneca-Vaxzevria                       | Any Infection                     | Omicron | Mixed variant                    | 6 [0-13]   | 18-100 | 68.8% [67.5-70%]   | Moderate |
|                              |                                                                                                                                                                    | Infection + 1st booster vaccine vs naive                                   | AstraZeneca-Vaxzevria                       | Any Infection                     | Omicron | Mixed variant                    | 42 [14-69] | 18-100 | 72.1% [71.4-72.8%] | Moderate |
|                              |                                                                                                                                                                    | Infection + 1st booster vaccine vs naive                                   | CoronaVac                                   | Any Infection                     | Omicron | Mixed variant                    | 6 [0-13]   | 18-100 | 66.9% [64.7-69%]   | Moderate |
|                              |                                                                                                                                                                    | Infection + 1st booster vaccine vs naive                                   | CoronaVac                                   | Any Infection                     | Omicron | Mixed variant                    | 42 [14-69] | 18-100 | 73.4% [72.4-74.3%] | Moderate |
|                              |                                                                                                                                                                    | Infection + 1st booster vaccine vs naive                                   | CoronaVac                                   | Any Infection                     | Omicron | Mixed variant                    | 70         | 18-100 | 54.6% [53.7-55.5%] | Moderate |
|                              |                                                                                                                                                                    | Infection + 1st booster vaccine vs naive                                   | Janssen-Ad26.COV2.S                         | Any Infection                     | Omicron | Mixed variant                    | 6 [0-13]   | 18-100 | 52.4% [46.9-57.4%] | Moderate |
|                              |                                                                                                                                                                    | Infection + 1st booster vaccine vs naive                                   | Janssen-Ad26.COV2.S                         | Any Infection                     | Omicron | Mixed variant                    | 42 [14-69] | 18-100 | 44.8% [42.4-47.2%] | Moderate |
|                              |                                                                                                                                                                    | Infection + 1st booster vaccine vs naive                                   | Pfizer/BioNTech-Comirnaty                   | Any Infection                     | Omicron | Mixed variant                    | 6 [0-13]   | 18-100 | 68% [65.8-70.2%]   | Moderate |
|                              |                                                                                                                                                                    | Infection + 1st booster vaccine vs naive                                   | Pfizer/BioNTech-Comirnaty                   | Any Infection                     | Omicron | Mixed variant                    | 42 [14-69] | 18-100 | 68.2% [66.4-69.9%] | Moderate |
|                              |                                                                                                                                                                    | Infection + 1st booster vaccine vs naive                                   | Pfizer/BioNTech-Comirnaty                   | Any Infection                     | Omicron | Mixed variant                    | 70         | 18-100 | 58.2% [45.4-68.1%] | Moderate |
|                              |                                                                                                                                                                    | Infection + 1st booster vaccine vs naive                                   | AstraZeneca-Vaxzevria                       | Hospitalization or severe disease | Omicron | Mixed variant                    | 42 [14-69] | 18-100 | 98.1% [97.7-98.5%] | Moderate |
|                              |                                                                                                                                                                    | Infection + 1st booster vaccine vs naive                                   | AstraZeneca-Vaxzevria                       | Hospitalization or severe disease | Omicron | Mixed variant                    | 70         | 18-100 | 97.2% [96.2-98%]   | Moderate |
|                              |                                                                                                                                                                    | Infection + 1st booster vaccine vs naive                                   | AstraZeneca-Vaxzevria                       | Hospitalization or severe disease | Omicron | Mixed variant                    | 6 [0-13]   | 18-100 | 97.6% [96.2-98.5%] | Moderate |
|                              |                                                                                                                                                                    | Infection + 1st booster vaccine vs naive                                   | CoronaVac                                   | Hospitalization or severe disease | Omicron | Mixed variant                    | 42 [14-69] | 18-100 | 96.9% [96.97.6%]   | Moderate |

|  |                                                  |                           |                                   |         |               |              |        |                    |          |
|--|--------------------------------------------------|---------------------------|-----------------------------------|---------|---------------|--------------|--------|--------------------|----------|
|  | Infection + 1st booster vaccine vs naive         | CoronaVac                 | Hospitalization or severe disease | Omicron | Mixed variant | 70           | 18-100 | 96.7% [96.2-97.1%] | Moderate |
|  | Infection + 1st booster vaccine vs naive         | CoronaVac                 | Hospitalization or severe disease | Omicron | Mixed variant | 6 [0-13]     | 18-100 | 95% [89.9-97.6%]   | Moderate |
|  | Infection + 1st booster vaccine vs naive         | Janssen-Ad26.COVS.2.S     | Hospitalization or severe disease | Omicron | Mixed variant | 6 [0-13]     | 18-100 | 93.3% [72.9-98.3%] | Moderate |
|  | Infection + 1st booster vaccine vs naive         | Janssen-Ad26.COVS.2.S     | Hospitalization or severe disease | Omicron | Mixed variant | 42 [14-69]   | 18-100 | 97.8% [94.9-99.2%] | Moderate |
|  | Infection + 1st booster vaccine vs naive         | Pfizer/BioNTech-Comirnaty | Hospitalization or severe disease | Omicron | Mixed variant | 6 [0-13]     | 18-100 | 99.6% [93.3-100%]  | Moderate |
|  | Infection + 1st booster vaccine vs naive         | Pfizer/BioNTech-Comirnaty | Hospitalization or severe disease | Omicron | Mixed variant | 42 [14-69]   | 18-100 | 96.8% [94.1-98.2%] | Moderate |
|  | Infection + full primary series vaccine vs naive | AstraZeneca-Vaxzevria     | Any Infection                     | Omicron | Mixed variant | 6 [0-13]     | 18-100 | 59.7% [49.7-67.7%] | Moderate |
|  | Infection + full primary series vaccine vs naive | AstraZeneca-Vaxzevria     | Any Infection                     | Omicron | Mixed variant | 42 [14-69]   | 18-100 | 45.5% [42.6-48.3%] | Moderate |
|  | Infection + full primary series vaccine vs naive | AstraZeneca-Vaxzevria     | Any Infection                     | Omicron | Mixed variant | 104 [70-139] | 18-100 | 38.8% [37.7-39.8%] | Moderate |
|  | Infection + full primary series vaccine vs naive | AstraZeneca-Vaxzevria     | Any Infection                     | Omicron | Mixed variant | 140          | 18-100 | 40.7% [39.6-41.7%] | Moderate |
|  | Infection + full primary series vaccine vs naive | CoronaVac                 | Any Infection                     | Omicron | Mixed variant | 6 [0-13]     | 18-100 | 53.3% [43.3-61.4%] | Moderate |
|  | Infection + full primary series vaccine vs naive | CoronaVac                 | Any Infection                     | Omicron | Mixed variant | 42 [14-69]   | 18-100 | 46% [42.6-49.2%]   | Moderate |
|  | Infection + full primary series vaccine vs naive | CoronaVac                 | Any Infection                     | Omicron | Mixed variant | 104 [70-139] | 18-100 | 31% [29.4-32.5%]   | Moderate |
|  | Infection + full primary series vaccine vs naive | CoronaVac                 | Any Infection                     | Omicron | Mixed variant | 140          | 18-100 | 36.2% [34.9-37.4%] | Moderate |
|  | Infection + full primary series vaccine vs naive | Janssen-Ad26.COVS.2.S     | Any Infection                     | Omicron | Mixed variant | 14           | 18-100 | 39.7% [37.5-41.8%] | Moderate |
|  | Infection + full primary series vaccine vs naive | Pfizer/BioNTech-Comirnaty | Any Infection                     | Omicron | Mixed variant | 42 [14-69]   | 18-100 | 63.6% [62.5-64.7%] | Moderate |

|  |                                                  |                           |                                   |         |               |              |        |                    |          |
|--|--------------------------------------------------|---------------------------|-----------------------------------|---------|---------------|--------------|--------|--------------------|----------|
|  | Infection + full primary series vaccine vs naive | Pfizer/BioNTech-Comirnaty | Any Infection                     | Omicron | Mixed variant | 6 [0-13]     | 18-100 | 71.1% [66.8-74.8%] | Moderate |
|  | Infection + full primary series vaccine vs naive | Pfizer/BioNTech-Comirnaty | Any Infection                     | Omicron | Mixed variant | 104 [70-139] | 18-100 | 50.2% [49.4-50.9%] | Moderate |
|  | Infection + full primary series vaccine vs naive | Pfizer/BioNTech-Comirnaty | Any Infection                     | Omicron | Mixed variant | 140          | 18-100 | 45.7% [43.7-47.7%] | Moderate |
|  | Infection + full primary series vaccine vs naive | AstraZeneca-Vaxzevria     | Hospitalization or severe disease | Omicron | Mixed variant | 42 [14-69]   | 18-100 | 89.9% [81.9-94.3%] | Moderate |
|  | Infection + full primary series vaccine vs naive | AstraZeneca-Vaxzevria     | Hospitalization or severe disease | Omicron | Mixed variant | 104 [70-139] | 18-100 | 93.9% [92.8-94.9%] | Moderate |
|  | Infection + full primary series vaccine vs naive | AstraZeneca-Vaxzevria     | Hospitalization or severe disease | Omicron | Mixed variant | 140          | 18-100 | 94.5% [93.8-95.1%] | Moderate |
|  | Infection + full primary series vaccine vs naive | CoronaVac                 | Hospitalization or severe disease | Omicron | Mixed variant | 104 [70-139] | 18-100 | 88.7% [85.4-91.3%] | Moderate |
|  | Infection + full primary series vaccine vs naive | CoronaVac                 | Hospitalization or severe disease | Omicron | Mixed variant | 42 [14-69]   | 18-100 | 88.4% [77.9-93.9%] | Moderate |
|  | Infection + full primary series vaccine vs naive | CoronaVac                 | Hospitalization or severe disease | Omicron | Mixed variant | 140          | 18-100 | 90.7% [89.5-91.8%] | Moderate |
|  | Infection + full primary series vaccine vs naive | Janssen-Ad26.COV2.S       | Hospitalization or severe disease | Omicron | Mixed variant | 14           | 18-100 | 91.2% [87.2-93.9%] | Moderate |
|  | Infection + full primary series vaccine vs naive | Pfizer/BioNTech-Comirnaty | Hospitalization or severe disease | Omicron | Mixed variant | 6 [0-13]     | 18-100 | 95.5% [67.6-99.4%] | Moderate |
|  | Infection + full primary series vaccine vs naive | Pfizer/BioNTech-Comirnaty | Hospitalization or severe disease | Omicron | Mixed variant | 42 [14-69]   | 18-100 | 92% [88-94.7%]     | Moderate |
|  | Infection + full primary series vaccine vs naive | Pfizer/BioNTech-Comirnaty | Hospitalization or severe disease | Omicron | Mixed variant | 104 [70-139] | 18-100 | 94.7% [93.4-95.7%] | Moderate |
|  | Infection + full primary series vaccine vs naive | Pfizer/BioNTech-Comirnaty | Hospitalization or severe disease | Omicron | Mixed variant | 140          | 18-100 | 94% [91.4-95.9%]   | Moderate |
|  | Infection + 1st booster vaccine vs infection     | AstraZeneca-Vaxzevria     | Any Infection                     | Omicron | Mixed variant | 6 [0-13]     | 18-100 | 56% [53.8-58%]     | Moderate |
|  | Infection + 1st booster vaccine vs infection     | AstraZeneca-Vaxzevria     | Any Infection                     | Omicron | Mixed variant | 70           | 18-100 | 32.6% [29.4-35.7%] | Moderate |

|  |                                              |                           |                                   |         |               |            |        |                    |          |
|--|----------------------------------------------|---------------------------|-----------------------------------|---------|---------------|------------|--------|--------------------|----------|
|  | Infection + 1st booster vaccine vs infection | AstraZeneca-Vaxzevria     | Any Infection                     | Omicron | Mixed variant | 42 [14-69] | 18-100 | 60.5% [59.1-61.9%] | Moderate |
|  | Infection + 1st booster vaccine vs infection | CoronaVac                 | Any Infection                     | Omicron | Mixed variant | 70         | 18-100 | 37.9% [35.8-40%]   | Moderate |
|  | Infection + 1st booster vaccine vs infection | CoronaVac                 | Any Infection                     | Omicron | Mixed variant | 42 [14-69] | 18-100 | 62.7% [61.6-64.3%] | Moderate |
|  | Infection + 1st booster vaccine vs infection | CoronaVac                 | Any Infection                     | Omicron | Mixed variant | 6 [0-13]   | 18-100 | 54.7% [51.4-57.8%] | Moderate |
|  | Infection + 1st booster vaccine vs infection | Janssen-Ad26.CO2.S        | Any Infection                     | Omicron | Mixed variant | 6 [0-13]   | 18-100 | 34.1% [26.2-41.1%] | Moderate |
|  | Infection + 1st booster vaccine vs infection | Janssen-Ad26.CO2.S        | Any Infection                     | Omicron | Mixed variant | 42 [14-69] | 18-100 | 22.8% [18.8-26.6%] | Moderate |
|  | Infection + 1st booster vaccine vs infection | Pfizer/BioNTech-Comirnaty | Any Infection                     | Omicron | Mixed variant | 70         | 18-100 | 43.3% [25.8-56.6%] | Moderate |
|  | Infection + 1st booster vaccine vs infection | Pfizer/BioNTech-Comirnaty | Any Infection                     | Omicron | Mixed variant | 6 [0-13]   | 18-100 | 55.7% [52.3-58.9%] | Moderate |
|  | Infection + 1st booster vaccine vs infection | Pfizer/BioNTech-Comirnaty | Any Infection                     | Omicron | Mixed variant | 42 [14-69] | 18-100 | 56.4% [53.7-59%]   | Moderate |
|  | Infection + 1st booster vaccine vs infection | AstraZeneca-Vaxzevria     | Hospitalization or severe disease | Omicron | Mixed variant | 42 [14-69] | 18-100 | 84.5% [79.4-88.4%] | Moderate |
|  | Infection + 1st booster vaccine vs infection | AstraZeneca-Vaxzevria     | Hospitalization or severe disease | Omicron | Mixed variant | 6 [0-13]   | 18-100 | 79.4% [66.8-87.3%] | Moderate |
|  | Infection + 1st booster vaccine vs infection | AstraZeneca-Vaxzevria     | Hospitalization or severe disease | Omicron | Mixed variant | 70         | 18-100 | 81.2% [72.5-87.1%] | Moderate |
|  | Infection + 1st booster vaccine vs infection | CoronaVac                 | Hospitalization or severe disease | Omicron | Mixed variant | 70         | 18-100 | 75.7% [69.6-80.7%] | Moderate |
|  | Infection + 1st booster vaccine vs infection | CoronaVac                 | Hospitalization or severe disease | Omicron | Mixed variant | 42 [14-69] | 18-100 | 76.6% [68.1-82.8%] | Moderate |
|  | Infection + 1st booster vaccine vs infection | CoronaVac                 | Hospitalization or severe disease | Omicron | Mixed variant | 6 [0-13]   | 18-100 | 67.9% [32.6-84.7%] | Moderate |
|  | Infection + 1st booster vaccine vs infection | Janssen-Ad26.CO2.S        | Hospitalization or severe disease | Omicron | Mixed variant | 42 [14-69] | 18-100 | 84% [56.6-94.1%]   | Moderate |

|  |                                                      |                           |                                   |         |               |              |        |                    |          |
|--|------------------------------------------------------|---------------------------|-----------------------------------|---------|---------------|--------------|--------|--------------------|----------|
|  | Infection + 1st booster vaccine vs infection         | Janssen-Ad26.COVID.2.S    | Hospitalization or severe disease | Omicron | Mixed variant | 6 [0-13]     | 18-100 | 55.2% [1-89%]      | Moderate |
|  | Infection + 1st booster vaccine vs infection         | Pfizer/BioNTech-Comirnaty | Hospitalization or severe disease | Omicron | Mixed variant | 6 [0-13]     | 18-100 | 97.8% [64.9-99.9%] | Moderate |
|  | Infection + 1st booster vaccine vs infection         | Pfizer/BioNTech-Comirnaty | Hospitalization or severe disease | Omicron | Mixed variant | 42 [14-69]   | 18-100 | 75% [53.3-86.7%]   | Moderate |
|  | Infection + full primary series vaccine vs infection | AstraZeneca-Vaxzevria     | Any Infection                     | Omicron | Mixed variant | 6 [0-13]     | 18-100 | 43.6% [29.4-54.9%] | Moderate |
|  | Infection + full primary series vaccine vs infection | AstraZeneca-Vaxzevria     | Any Infection                     | Omicron | Mixed variant | 104 [70-139] | 18-100 | 14.5% [11.9-17.1%] | Moderate |
|  | Infection + full primary series vaccine vs infection | AstraZeneca-Vaxzevria     | Any Infection                     | Omicron | Mixed variant | 42 [14-69]   | 18-100 | 25.5% [21-29.7%]   | Moderate |
|  | Infection + full primary series vaccine vs infection | AstraZeneca-Vaxzevria     | Any Infection                     | Omicron | Mixed variant | 140          | 18-100 | 17% [14.4-19.6%]   | Moderate |
|  | Infection + full primary series vaccine vs infection | CoronaVac                 | Any Infection                     | Omicron | Mixed variant | 140          | 18-100 | 12.3% [9.4-15.1%]  | Moderate |
|  | Infection + full primary series vaccine vs infection | CoronaVac                 | Any Infection                     | Omicron | Mixed variant | 42 [14-69]   | 18-100 | 23.4% [18.2-28.3%] | Moderate |
|  | Infection + full primary series vaccine vs infection | CoronaVac                 | Any Infection                     | Omicron | Mixed variant | 6 [0-13]     | 18-100 | 34.5% [20.4-46.1%] | Moderate |
|  | Infection + full primary series vaccine vs infection | CoronaVac                 | Any Infection                     | Omicron | Mixed variant | 104 [70-139] | 18-100 | 7.3% [4-10.4%]     | Moderate |
|  | Infection + full primary series vaccine vs infection | Janssen-Ad26.COVID.2.S    | Any Infection                     | Omicron | Mixed variant | 14           | 18-100 | 16.2% [12.4-19.8%] | Moderate |
|  | Infection + full primary series vaccine vs infection | Pfizer/BioNTech-Comirnaty | Any Infection                     | Omicron | Mixed variant | 42 [14-69]   | 18-100 | 51.9% [50-53.8%]   | Moderate |
|  | Infection + full primary series vaccine vs infection | Pfizer/BioNTech-Comirnaty | Any Infection                     | Omicron | Mixed variant | 6 [0-13]     | 18-100 | 60.3% [54.3-65.5%] | Moderate |
|  | Infection + full primary series vaccine vs infection | Pfizer/BioNTech-Comirnaty | Any Infection                     | Omicron | Mixed variant | 140          | 18-100 | 26.2% [22.8-29.4%] | Moderate |
|  | Infection + full primary series vaccine vs infection | Pfizer/BioNTech-Comirnaty | Any Infection                     | Omicron | Mixed variant | 104 [70-139] | 18-100 | 32.8% [30.7-34.7%] | Moderate |



|                |                                                                                                                                                |                                                      |                                             |                                   |         |                   |              |        |                    |          |
|----------------|------------------------------------------------------------------------------------------------------------------------------------------------|------------------------------------------------------|---------------------------------------------|-----------------------------------|---------|-------------------|--------------|--------|--------------------|----------|
|                |                                                                                                                                                | Infection + full primary series vaccine vs infection | AstraZeneca-Vaxzevria                       | Hospitalization or severe disease | Omicron | Mixed variant     | 42 [14-69]   | 18-100 | 41% [1-67.8%]      | Moderate |
|                |                                                                                                                                                | Infection + full primary series vaccine vs infection | AstraZeneca-Vaxzevria                       | Hospitalization or severe disease | Omicron | Mixed variant     | 140          | 18-100 | 55.4% [44.6-64.1%] | Moderate |
|                |                                                                                                                                                | Infection + full primary series vaccine vs infection | AstraZeneca-Vaxzevria                       | Hospitalization or severe disease | Omicron | Mixed variant     | 104 [70-139] | 18-100 | 57.1% [44.8-66.7%] | Moderate |
|                |                                                                                                                                                | Infection + full primary series vaccine vs infection | CoronaVac                                   | Hospitalization or severe disease | Omicron | Mixed variant     | 42 [14-69]   | 18-100 | 34.1% [1-66.3%]    | Moderate |
|                |                                                                                                                                                | Infection + full primary series vaccine vs infection | CoronaVac                                   | Hospitalization or severe disease | Omicron | Mixed variant     | 140          | 18-100 | 34.4% [18.3-47.3%] | Moderate |
|                |                                                                                                                                                | Infection + full primary series vaccine vs infection | CoronaVac                                   | Hospitalization or severe disease | Omicron | Mixed variant     | 104 [70-139] | 18-100 | 39.8% [16.9-56.4%] | Moderate |
|                |                                                                                                                                                | Infection + full primary series vaccine vs infection | Janssen-Ad26.COVS.2.S                       | Hospitalization or severe disease | Omicron | Mixed variant     | 14           | 18-100 | 39.5% [8.3-60%]    | Moderate |
|                |                                                                                                                                                | Infection + full primary series vaccine vs infection | Pfizer/BioNTech-Comirnaty                   | Hospitalization or severe disease | Omicron | Mixed variant     | 140          | 18-100 | 53.6% [30.2-69.1%] | Moderate |
|                |                                                                                                                                                | Infection + full primary series vaccine vs infection | Pfizer/BioNTech-Comirnaty                   | Hospitalization or severe disease | Omicron | Mixed variant     | 104 [70-139] | 18-100 | 67.8% [57.4-75.6%] | Moderate |
|                |                                                                                                                                                | Infection + full primary series vaccine vs infection | Pfizer/BioNTech-Comirnaty                   | Hospitalization or severe disease | Omicron | Mixed variant     | 42 [14-69]   | 18-100 | 59.6% [36.6-74.2%] | Moderate |
|                |                                                                                                                                                | Infection + full primary series vaccine vs infection | Pfizer/BioNTech-Comirnaty                   | Hospitalization or severe disease | Omicron | Mixed variant     | 6 [0-13]     | 18-100 | 72.6% [1-96.2%]    | Moderate |
| Chin (USA)(14) | Test-negative case-control (Matched based on test week, prison, position, Covid-19 risk score, and room type. Adjusted for age group, and sex) | Infection + 1st booster vaccine vs naive             | Pfizer/BioNTech-Comirnaty,Moderna-mRNA-1273 | Any Infection                     | Omicron | Delta (B.1.617.2) | 68           | 18-100 | 87.4% [81.2-94%]   | Moderate |
|                |                                                                                                                                                | Infection + 1st booster vaccine vs naive             | Pfizer/BioNTech-Comirnaty,Moderna-mRNA-1273 | Any Infection                     | Omicron | Delta (B.1.617.2) | 59           | 18-100 | 86% [77.2-95.9%]   | Moderate |
|                |                                                                                                                                                | Infection + full primary series vaccine vs naive     | Pfizer/BioNTech-Comirnaty,Moderna-mRNA-1273 | Any Infection                     | Omicron | Delta (B.1.617.2) | 201          | 18-100 | 72.2% [68-80%]     | Moderate |
|                |                                                                                                                                                | Infection + full primary series vaccine vs naive     | Pfizer/BioNTech-Comirnaty,Moderna-mRNA-1273 | Any Infection                     | Omicron | Delta (B.1.617.2) | 230          | 18-100 | 74.9% [66.1-86.7%] | Moderate |
| Lind (USA)(15) | Test-negative case-control (Adjusted                                                                                                           | Infection + 1st booster vaccine vs infection         | Pfizer/BioNTech-Comirnaty,Moderna-mRNA-1273 | Any Infection                     | Omicron | Mixed variant     | 14           | 5-100  | 45.1% [19-62.8%]   | Serious  |

|                                                                                                                                                      |                                                      |                                             |               |         |               |             |       |                    |         |
|------------------------------------------------------------------------------------------------------------------------------------------------------|------------------------------------------------------|---------------------------------------------|---------------|---------|---------------|-------------|-------|--------------------|---------|
| for date of test, age (continuous), sex, race/ethnicity, comorbidity score, clinical encounters, insurance group, and regional social vulnerability) | Infection + 1st booster vaccine vs infection         | Pfizer/BioNTech-Comirnaty,Moderna-mRNA-1273 | Any Infection | Omicron | Mixed variant | 82 [14-149] | 5-100 | 45.8% [20-63.2%]   | Serious |
|                                                                                                                                                      | Infection + 1st booster vaccine vs infection         | Pfizer/BioNTech-Comirnaty,Moderna-mRNA-1273 | Any Infection | Omicron | Mixed variant | 14          | 5-100 | 36% [1-76.2%]      | Serious |
|                                                                                                                                                      | Infection + 1st booster vaccine vs infection         | Pfizer/BioNTech-Comirnaty,Moderna-mRNA-1273 | Any Infection | Omicron | Mixed variant | 14          | 5-100 | 38.5% [7.2-59.3%]  | Serious |
|                                                                                                                                                      | Infection + 1st booster vaccine vs infection         | Pfizer/BioNTech-Comirnaty,Moderna-mRNA-1273 | Any Infection | Omicron | Mixed variant | 14          | 5-100 | 36.3% [1-76.4%]    | Serious |
|                                                                                                                                                      | Infection + 1st booster vaccine vs infection         | Pfizer/BioNTech-Comirnaty,Moderna-mRNA-1273 | Any Infection | Omicron | Mixed variant | 14          | 5-100 | 48.5% [22.2-65.9%] | Serious |
|                                                                                                                                                      | Infection + 1st booster vaccine vs infection         | Pfizer/BioNTech-Comirnaty,Moderna-mRNA-1273 | Any Infection | Omicron | Mixed variant | 14          | 5-100 | 34.3% [1-75.7%]    | Serious |
|                                                                                                                                                      | Infection + 1st booster vaccine vs infection         | Pfizer/BioNTech-Comirnaty,Moderna-mRNA-1273 | Any Infection | Omicron | Mixed variant | 14          | 5-100 | 21.3% [1-71%]      | Serious |
|                                                                                                                                                      | Infection + full primary series vaccine vs infection | Pfizer/BioNTech-Comirnaty,Moderna-mRNA-1273 | Any Infection | Omicron | Mixed variant | 82 [14-149] | 5-100 | 37.3% [8.4-57.1%]  | Serious |
|                                                                                                                                                      | Infection + full primary series vaccine vs infection | Pfizer/BioNTech-Comirnaty,Moderna-mRNA-1273 | Any Infection | Omicron | Mixed variant | 150         | 5-100 | 34.2% [18.7-46.8%] | Serious |
|                                                                                                                                                      | Infection + full primary series vaccine vs infection | Pfizer/BioNTech-Comirnaty,Moderna-mRNA-1273 | Any Infection | Omicron | Mixed variant | 82 [14-149] | 5-100 | 38.4% [10.5-57.6%] | Serious |
|                                                                                                                                                      | Infection + full primary series vaccine vs infection | Pfizer/BioNTech-Comirnaty,Moderna-mRNA-1273 | Any Infection | Omicron | Mixed variant | 150         | 5-100 | 33.3% [17.6-45.9%] | Serious |
|                                                                                                                                                      | Infection + full primary series vaccine vs infection | Pfizer/BioNTech-Comirnaty,Moderna-mRNA-1273 | Any Infection | Omicron | Mixed variant | 82 [14-149] | 5-100 | 30.8% [1-52.4%]    | Serious |
|                                                                                                                                                      | Infection + full primary series vaccine vs infection | Pfizer/BioNTech-Comirnaty,Moderna-mRNA-1273 | Any Infection | Omicron | Mixed variant | 150         | 5-100 | 23.8% [6-38.2%]    | Serious |
|                                                                                                                                                      | Infection + full primary series vaccine vs infection | Pfizer/BioNTech-Comirnaty,Moderna-mRNA-1273 | Any Infection | Omicron | Mixed variant | 14          | 5-100 | 33.2% [3.7-53.6%]  | Serious |
|                                                                                                                                                      | Infection + full primary series vaccine vs infection | Pfizer/BioNTech-Comirnaty,Moderna-mRNA-1273 | Any Infection | Omicron | Mixed variant | 14          | 5-100 | 33.1% [3.6-53.6%]  | Serious |
|                                                                                                                                                      | Infection + full primary series vaccine vs infection | Pfizer/BioNTech-Comirnaty,Moderna-mRNA-1273 | Any Infection | Omicron | Mixed variant | 14          | 5-100 | 32.4% [2.6-53%]    | Serious |

|                       |                                                                                                                                                       |                                                                            |                                                                                                                 |               |         |               |               |        |                    |         |
|-----------------------|-------------------------------------------------------------------------------------------------------------------------------------------------------|----------------------------------------------------------------------------|-----------------------------------------------------------------------------------------------------------------|---------------|---------|---------------|---------------|--------|--------------------|---------|
|                       |                                                                                                                                                       | Infection + full primary series vaccine vs infection                       | Pfizer/BioNTech-Comirnaty,Moderna-mRNA-1273                                                                     | Any Infection | Omicron | Mixed variant | 82 [14-149]   | 5-100  | 36.1% [7.1-56.1%]  | Serious |
|                       |                                                                                                                                                       | Infection + full primary series vaccine vs infection                       | Pfizer/BioNTech-Comirnaty,Moderna-mRNA-1273                                                                     | Any Infection | Omicron | Mixed variant | 150           | 5-100  | 34% [18.5-46.5%]   | Serious |
|                       |                                                                                                                                                       | Infection + full primary series vaccine vs infection                       | Pfizer/BioNTech-Comirnaty,Moderna-mRNA-1273                                                                     | Any Infection | Omicron | Mixed variant | 14            | 5-100  | 26.2% [1.48.6%]    | Serious |
|                       |                                                                                                                                                       | Infection + 1st booster vaccine vs infection + full primary series vaccine | Pfizer/BioNTech-Comirnaty,Moderna-mRNA-1273                                                                     | Any Infection | Omicron | Mixed variant | 328 [258-384] | 5-100  | 17.0% [1.44.0%]    | Serious |
| Medic (Serbia)(21)    | Traditional case-control (Matched cohorts- Adjusted for age and sex.)                                                                                 | Infection + 1st booster vaccine vs infection                               | Pfizer/BioNTech-Comirnaty,Moderna-mRNA-1273,AstraZeneca-Vaxzevria, Gamaleja-Sputnik-V, Gam-COVID-Vac,BBIBP-CorV | Any Infection | Omicron | Mixed variant | 7             | 18-100 | 18.7% [12.3-24.8%] | Serious |
|                       |                                                                                                                                                       | Infection + 1st booster vaccine vs infection + partial vaccine             | Pfizer/BioNTech-Comirnaty,Moderna-mRNA-1273,AstraZeneca-Vaxzevria,Gamaleja-Sputnik-V,BBIBP-CorV                 | Any Infection | Omicron | Mixed variant | 14            | 18-100 | 24.8% [7.4-39%]    | Serious |
|                       |                                                                                                                                                       | Infection + 1st booster vaccine vs infection + full primary series vaccine | Pfizer/BioNTech-Comirnaty,Moderna-mRNA-1273,AstraZeneca-Vaxzevria,Gamaleja-Sputnik-V,BBIBP-CorV                 | Any Infection | Omicron | Mixed variant | 7             | 18-100 | 33.3% [27.38.7%]   | Serious |
| Nielsen (Denmark)(22) | Retrospective cohort (Adjusted for age, sex, comorbidity, region of affiliation, staying at hospital, vaccination status, and time since vaccination) | Infection + full primary series vaccine vs infection                       | Pfizer/BioNTech-Comirnaty,Moderna-mRNA-1273,AstraZeneca-Vaxzevria,Janssen-Ad26.COVID-19                         | Any Infection | Omicron | Index-Delta   | 298 [284-313] | 0-100  | 25.8% [1.46%]      | Serious |
|                       |                                                                                                                                                       | Infection + full primary series vaccine vs infection                       | Pfizer/BioNTech-Comirnaty,Moderna-mRNA-1273,AstraZeneca-Vaxzevria,Janssen-Ad26.COVID-19                         | Any Infection | Omicron | Index-Delta   | 328 [314-343] | 0-100  | 24.8% [1.48%]      | Serious |
|                       |                                                                                                                                                       | Infection + full primary series vaccine vs infection                       | Pfizer/BioNTech-Comirnaty,Moderna-mRNA-1273,AstraZeneca-Vaxzevria,Janssen-Ad26.COVID-19                         | Any Infection | Omicron | Index-Delta   | 344           | 0-100  | 28.6% [1.52%]      | Serious |
|                       |                                                                                                                                                       | Infection + full primary series vaccine vs infection                       | Pfizer/BioNTech-Comirnaty,Moderna-mRNA-1273,AstraZeneca-Vaxzevria,Janssen-Ad26.COVID-19                         | Any Infection | Omicron | Index-Delta   | 208 [194-223] | 0-100  | 18.4% [11.2-24.8%] | Serious |

|                 |                                                                                                                                                                          |                                                      |                                                                                       |                                   |         |               |               |        |                    |          |
|-----------------|--------------------------------------------------------------------------------------------------------------------------------------------------------------------------|------------------------------------------------------|---------------------------------------------------------------------------------------|-----------------------------------|---------|---------------|---------------|--------|--------------------|----------|
|                 |                                                                                                                                                                          | Infection + full primary series vaccine vs infection | Pfizer/BioNTech-Comirnaty,Moderna-mRNA-1273,AstraZeneca-Vaxzevria,Janssen-Ad26.COV2.S | Any Infection                     | Omicron | Index-Delta   | 238 [224-253] | 0-100  | 19.3% [6.9-31.4%]  | Serious  |
|                 |                                                                                                                                                                          | Infection + full primary series vaccine vs infection | Pfizer/BioNTech-Comirnaty,Moderna-mRNA-1273,AstraZeneca-Vaxzevria,Janssen-Ad26.COV2.S | Any Infection                     | Omicron | Index-Delta   | 268 [254-283] | 0-100  | 37.1% [19.3-51%]   | Serious  |
|                 |                                                                                                                                                                          | Infection + full primary series vaccine vs infection | Pfizer/BioNTech-Comirnaty,Moderna-mRNA-1273,AstraZeneca-Vaxzevria,Janssen-Ad26.COV2.S | Any Infection                     | Omicron | Index-Delta   | 28 [14-43]    | 0-100  | 56.1% [54.58.2%]   | Serious  |
|                 |                                                                                                                                                                          | Infection + full primary series vaccine vs infection | Pfizer/BioNTech-Comirnaty,Moderna-mRNA-1273,AstraZeneca-Vaxzevria,Janssen-Ad26.COV2.S | Any Infection                     | Omicron | Index-Delta   | 88 [74-103]   | 0-100  | 39.1% [35.2-42%]   | Serious  |
|                 |                                                                                                                                                                          | Infection + full primary series vaccine vs infection | Pfizer/BioNTech-Comirnaty,Moderna-mRNA-1273,AstraZeneca-Vaxzevria,Janssen-Ad26.COV2.S | Any Infection                     | Omicron | Index-Delta   | 118 [104-133] | 0-100  | 30.4% [28.6-33.3%] | Serious  |
|                 |                                                                                                                                                                          | Infection + full primary series vaccine vs infection | Pfizer/BioNTech-Comirnaty,Moderna-mRNA-1273,AstraZeneca-Vaxzevria,Janssen-Ad26.COV2.S | Any Infection                     | Omicron | Index-Delta   | 148 [134-163] | 0-100  | 17.5% [14.8-19.3%] | Serious  |
|                 |                                                                                                                                                                          | Infection + full primary series vaccine vs infection | Pfizer/BioNTech-Comirnaty,Moderna-mRNA-1273,AstraZeneca-Vaxzevria,Janssen-Ad26.COV2.S | Any Infection                     | Omicron | Index-Delta   | 178 [164-193] | 0-100  | 12.1% [8.6-14.8%]  | Serious  |
|                 |                                                                                                                                                                          | Infection + full primary series vaccine vs infection | Pfizer/BioNTech-Comirnaty,Moderna-mRNA-1273,AstraZeneca-Vaxzevria,Janssen-Ad26.COV2.S | Any Infection                     | Omicron | Index-Delta   | 58 [44-73]    | 0-100  | 46% [43-49%]       | Serious  |
| Plumb (USA)(23) | Test-negative case-control (Matched cohorts. Adjusted for sex, race/ethnicity, clinical encounters, underlying health conditions, and days since the previous infection) | Infection + 1st booster vaccine vs infection         | Moderna-mRNA-1273,Pfizer/BioNTech-Comirnaty                                           | Hospitalization or severe disease | Omicron | Mixed variant | 14            | 18-100 | 61.6% [51.4-69.7%] | Moderate |
|                 |                                                                                                                                                                          | Infection + full primary series vaccine vs infection | Pfizer/BioNTech-Comirnaty,Moderna-mRNA-1273                                           | Hospitalization or severe disease | Omicron | Mixed variant | 14            | 18-100 | 40.3% [30.6-48.6%] | Moderate |

|                     |                                                                                                                                  |                                                                               |                                                                                       |                                   |         |                           |               |       |                    |          |
|---------------------|----------------------------------------------------------------------------------------------------------------------------------|-------------------------------------------------------------------------------|---------------------------------------------------------------------------------------|-----------------------------------|---------|---------------------------|---------------|-------|--------------------|----------|
| Shrestha (USA)(24)  | Retrospective cohort (Adjusted for boosting dose, time since SARS-CoV-2 exposure, time since prior infection, and vaccine doses) | Infection + 1st booster vaccine vs infection + partial primary series vaccine | Pfizer/BioNTech-Comirnaty,Moderna-mRNA-1273                                           | Any Infection                     | Omicron | Index-Delta               | 7             | 0-100 | 1% [1-23%]         | Serious  |
|                     |                                                                                                                                  | Infection + 1st booster vaccine vs infection                                  | Pfizer/BioNTech-Comirnaty,Moderna-mRNA-1273                                           | Any Infection                     | Omicron | Index-Delta               | 331 [288-363] | 0-11  | 59.0% [46.8-68.3%] | Serious  |
| Šmíd (Czechia) (18) | Traditional case-control (Adjusted for age group, sex, and calendar time)                                                        | Infection + 1st booster vaccine vs naive                                      | Pfizer/BioNTech-Comirnaty,AstraZeneca-Vaxzevria,Moderna-mRNA-1273,Janssen-Ad26.COV2.S | Any Infection                     | Omicron | Delta (B.1.617.2)         | 30 [0-60]     | 0-100 | 91.4% [88.2-93.6%] | Moderate |
|                     |                                                                                                                                  | Infection + 1st booster vaccine vs naive                                      | Pfizer/BioNTech-Comirnaty,AstraZeneca-Vaxzevria,Moderna-mRNA-1273,Janssen-Ad26.COV2.S | Any Infection                     | Omicron | Delta (B.1.617.2)         | 61            | 0-100 | 80.8% [70.4-88.2%] | Moderate |
|                     |                                                                                                                                  | Infection + 1st booster vaccine vs naive                                      | Pfizer/BioNTech-Comirnaty,AstraZeneca-Vaxzevria,Moderna-mRNA-1273,Janssen-Ad26.COV2.S | Any Infection                     | Omicron | Wild-type,Alpha (B.1.1.7) | 30 [0-60]     | 0-100 | 72.5% [71.5-73.5%] | Moderate |
|                     |                                                                                                                                  | Infection + 1st booster vaccine vs naive                                      | Pfizer/BioNTech-Comirnaty,AstraZeneca-Vaxzevria,Moderna-mRNA-1273,Janssen-Ad26.COV2.S | Any Infection                     | Omicron | Wild-type,Alpha (B.1.1.7) | 61            | 0-100 | 46.1% [43.1-50.1%] | Moderate |
|                     |                                                                                                                                  | Infection + 1st booster vaccine vs naive                                      | Pfizer/BioNTech-Comirnaty,AstraZeneca-Vaxzevria,Moderna-mRNA-1273,Janssen-Ad26.COV2.S | Hospitalization or severe disease | Omicron | Wild-type,Alpha (B.1.1.7) | 30 [0-60]     | 0-100 | 95% [78-99%]       | Moderate |
|                     |                                                                                                                                  | Infection + 1st booster vaccine vs naive                                      | Pfizer/BioNTech-Comirnaty,AstraZeneca-Vaxzevria,Moderna-mRNA-1273,Janssen-Ad26.COV2.S | Hospitalization or severe disease | Omicron | Wild-type,Alpha (B.1.1.7) | 61            | 0-100 | 90% [64-98%]       | Moderate |
|                     |                                                                                                                                  | Infection + 1st booster vaccine vs naive                                      | Pfizer/BioNTech-Comirnaty,AstraZeneca-Vaxzevria,Moderna-mRNA-1273,Janssen-Ad26.COV2.S | Hospitalization or severe disease | Omicron | Delta (B.1.617.2)         | 61            | 0-100 | 71% [1-96%]        | Moderate |
|                     |                                                                                                                                  | Infection + full primary series vaccine vs naive                              | Pfizer/BioNTech-Comirnaty,AstraZeneca-                                                | Any Infection                     | Omicron | Delta (B.1.617.2)         | 30 [0-60]     | 0-100 | 80.8% [73.5-86.1%] | Moderate |

|  |                                                  |                                                                                        |                                   |         |                           |           |       |                    |          |
|--|--------------------------------------------------|----------------------------------------------------------------------------------------|-----------------------------------|---------|---------------------------|-----------|-------|--------------------|----------|
|  |                                                  | Vaxzevria,Moderna-mRNA-1273,Janssen-Ad26.COVS2.S                                       |                                   |         |                           |           |       |                    |          |
|  | Infection + full primary series vaccine vs naive | Pfizer/BioNTech-Comirnaty,AstraZeneca-Vaxzevria,Moderna-mRNA-1273,Janssen-Ad26.COVS2.S | Any Infection                     | Omicron | Delta (B.1.617.2)         | 61        | 0-100 | 85.1% [84-87.2%]   | Moderate |
|  | Infection + full primary series vaccine vs naive | Pfizer/BioNTech-Comirnaty,AstraZeneca-Vaxzevria,Moderna-mRNA-1273,Janssen-Ad26.COVS2.S | Any Infection                     | Omicron | Wild-type,Alpha (B.1.1.7) | 30 [0-60] | 0-100 | 75.6% [74.6-76.7%] | Moderate |
|  | Infection + full primary series vaccine vs naive | Pfizer/BioNTech-Comirnaty,AstraZeneca-Vaxzevria,Moderna-mRNA-1273,Janssen-Ad26.COVS2.S | Any Infection                     | Omicron | Wild-type,Alpha (B.1.1.7) | 61        | 0-100 | 43.1% [42.1-44.1%] | Moderate |
|  | Infection + full primary series vaccine vs naive | Pfizer/BioNTech-Comirnaty,AstraZeneca-Vaxzevria,Moderna-mRNA-1273,Janssen-Ad26.COVS2.S | Hospitalization or severe disease | Omicron | Delta (B.1.617.2)         | 61        | 0-100 | 93% [49-99%]       | Moderate |
|  | Infection + full primary series vaccine vs naive | Pfizer/BioNTech-Comirnaty,AstraZeneca-Vaxzevria,Moderna-mRNA-1273,Janssen-Ad26.COVS2.S | Hospitalization or severe disease | Omicron | Wild-type,Alpha (B.1.1.7) | 30 [0-60] | 0-100 | 94% [77-95%]       | Moderate |
|  | Infection + full primary series vaccine vs naive | Pfizer/BioNTech-Comirnaty,AstraZeneca-Vaxzevria,Moderna-mRNA-1273,Janssen-Ad26.COVS2.S | Hospitalization or severe disease | Omicron | Wild-type,Alpha (B.1.1.7) | 61        | 0-100 | 73% [78-99%]       | Moderate |

184  
185

186  
187  
188  
189  
190  
191

## Appendix 7. Risk of bias assessments

Of the 97 estimates reporting the protective effectiveness of prior infection, 27 (27.8%) were at moderate risk of bias and 70 (72.2%) were at serious risk of bias (Appendix, pp 38-39).

### a) Studies on the protective effectiveness of prior infection (prior infection vs. immune naive)

| First author (Country)              | Estimates in analysis (n) | Variant        | Outcome                           | Bias due to confounding | Bias due to participant selection | Bias due to intervention classification | Bias due to deviations from intended interventions | Bias due to missing data | Bias in measurement of outcomes | Bias due to selection of reported result | Overall Risk of bias |
|-------------------------------------|---------------------------|----------------|-----------------------------------|-------------------------|-----------------------------------|-----------------------------------------|----------------------------------------------------|--------------------------|---------------------------------|------------------------------------------|----------------------|
| Altarawneh 1 (Qatar) <sup>9</sup>   | 3                         | Omicron        | Any infection                     | Moderate                | Low                               | Low                                     | Low                                                | Serious                  | Low                             | Moderate                                 | Serious              |
|                                     | 1                         | Omicron        | Hospitalization or severe disease | Moderate                | Low                               | Low                                     | Low                                                | Moderate                 | Moderate                        | Moderate                                 | Moderate             |
| Altarawneh 2 (Qatar) <sup>10</sup>  | 1                         | Omicron        | Any infection (Symptomatic)       | Moderate                | Low                               | Low                                     | Low                                                | Moderate                 | Moderate                        | Moderate                                 | Moderate             |
|                                     | 1                         | Omicron        | Hospitalization or severe disease | Moderate                | Low                               | Low                                     | Low                                                | Moderate                 | Low                             | Moderate                                 | Moderate             |
|                                     | 1                         | Omicron (BA.1) | Any infection (Symptomatic)       | Moderate                | Low                               | Low                                     | Low                                                | Moderate                 | Moderate                        | Moderate                                 | Moderate             |
|                                     | 1                         | Omicron (BA.1) | Hospitalization or severe disease | Moderate                | Low                               | Low                                     | Low                                                | Moderate                 | Low                             | Moderate                                 | Moderate             |
|                                     | 1                         | Omicron (BA.2) | Any infection (Symptomatic)       | Moderate                | Low                               | Low                                     | Low                                                | Moderate                 | Moderate                        | Moderate                                 | Moderate             |
|                                     | 1                         | Omicron (BA.2) | Hospitalization or severe disease | Moderate                | Low                               | Low                                     | Low                                                | Moderate                 | Low                             | Moderate                                 | Moderate             |
| Andeweg (Netherlands) <sup>11</sup> | 10                        | Omicron (BA.1) | Any infection                     | Moderate                | Serious                           | Moderate                                | Low                                                | Low                      | Low                             | Moderate                                 | Serious              |
|                                     | 10                        | Omicron (BA.1) | Any infection (Symptomatic)       | Moderate                | Serious                           | Moderate                                | Low                                                | Low                      | Low                             | Moderate                                 | Serious              |
|                                     | 5                         | Omicron (BA.2) | Any infection                     | Moderate                | Serious                           | Moderate                                | Low                                                | Low                      | Low                             | Moderate                                 | Serious              |

|                                        |   |                |                                   |          |          |          |     |          |          |          |          |
|----------------------------------------|---|----------------|-----------------------------------|----------|----------|----------|-----|----------|----------|----------|----------|
|                                        | 5 | Omicron (BA.2) | Any infection (Symptomatic)       | Moderate | Serious  | Moderate | Low | Low      | Low      | Moderate | Serious  |
| Carazo (Canada) <sup>12</sup>          | 7 | Omicron        | Any infection                     | Moderate | Serious  | Low      | Low | Low      | Low      | Moderate | Serious  |
|                                        | 2 | Omicron        | Any infection (Symptomatic)       | Moderate | Low      | Low      | Low | Serious  | Low      | Moderate | Serious  |
|                                        | 2 | Omicron        | Hospitalization or severe disease | Moderate | Low      | Low      | Low | Low      | Low      | Moderate | Moderate |
| Cerqueira-Silva (Brazil) <sup>13</sup> | 3 | Omicron        | Any infection (Symptomatic)       | Low      | Low      | Low      | Low | Low      | Low      | Moderate | Moderate |
|                                        | 3 | Omicron        | Hospitalization                   | Moderate | Serious  | Low      | Low | Moderate | Moderate | Moderate | Serious  |
| Chin (USA) <sup>14</sup>               | 2 | Omicron        | Any infection                     | Low      | Low      | Low      | Low | Low      | Low      | Moderate | Moderate |
| Lind (USA) <sup>15</sup>               | 1 | Omicron        | Any infection                     | Moderate | Low      | Low      | Low | Moderate | Moderate | Moderate | Moderate |
| Michlmayr (Denmark) <sup>16</sup>      | 4 | Omicron        | Any infection                     | Moderate | Moderate | Low      | Low | Low      | Low      | Serious  | Serious  |
|                                        | 4 | Omicron        | Any infection (Symptomatic)       | Moderate | Moderate | Low      | Low | Low      | Serious  | Serious  | Serious  |
|                                        | 1 | Omicron        | Hospitalization or severe disease | Moderate | Moderate | Low      | Low | Low      | Low      | Serious  | Serious  |
| Nyberg (UK) <sup>17</sup>              | 8 | Omicron        | Hospitalization or severe disease | Serious  | Moderate | Serious  | Low | Serious  | Low      | Moderate | Serious  |
|                                        | 8 | Omicron        | Severe disease                    | Serious  | Moderate | Serious  | Low | Serious  | Low      | Moderate | Serious  |
| Šmíd (Czech) <sup>18</sup>             | 6 | Omicron        | Any infection                     | Moderate | Low      | Low      | Low | Moderate | Low      | Moderate | Moderate |
|                                        | 6 | Omicron        | Hospitalization or severe disease | Moderate | Low      | Low      | Low | Moderate | Low      | Moderate | Moderate |

192  
193  
194



195 Of the 153 estimates reporting the protective effectiveness of hybrid immunity compared to immune-naive individuals, 78 (51.0%) were at moderate risk of bias and 75  
 196 (49.0%) were at serious risk of bias (Appendix, pp 40-42).

198 Of the 86 estimates reporting the comparative protective effectiveness of hybrid immunity relative to individuals with prior infection only, of which five reported on  
 199 hybrid immunity with primary series vaccination, 48 (55.8%) were at moderate risk of bias and 38 (44.2%) were at serious risk of bias.

200 Of the six estimates reporting the comparative protective effectiveness of hybrid immunity with more vaccine doses relative to individuals with hybrid immunity with  
 201 fewer vaccine doses, one (16.6%) was at moderate risk of bias and five (83.3%) were at serious risk of bias (Appendix, pp 40-42).

202  
 203  
 204 **b) Studies on hybrid immunity**

| First author (country)             | Exposure vs. Comparator                   | Estimates in analysis (n) | Variant              | Outcome                           | Bias due to confounding | Bias due to participant selection | Bias due to intervention classification | Bias due to deviations from intended interventions | Bias due to missing data | Bias in measurement of outcomes | Bias due to selection of reported result | Overall risk of bias |
|------------------------------------|-------------------------------------------|---------------------------|----------------------|-----------------------------------|-------------------------|-----------------------------------|-----------------------------------------|----------------------------------------------------|--------------------------|---------------------------------|------------------------------------------|----------------------|
| Altarawneh 2 (Qatar) <sup>10</sup> | Infection and vaccination vs. naive       | 7                         | Omicron (BA.1, BA.2) | Any infection (symptomatic)       | Moderate                | Low                               | Low                                     | Low                                                | Low                      | Low                             | Moderate                                 | Moderate             |
| Andeweg (Netherlands) <sup>1</sup> | Infection and vaccination vs. naive       | 21                        | Omicron (BA.1)       | Any infection                     | Moderate                | Serious                           | Moderate                                | Low                                                | Low                      | Low                             | Moderate                                 | Serious              |
|                                    | Infection and vaccination vs. naive       | 21                        | Omicron (BA.1)       | Any infection (symptomatic)       | Moderate                | Serious                           | Moderate                                | Low                                                | Low                      | Low                             | Moderate                                 | Serious              |
|                                    | Infection and vaccination vs. naive       | 11                        | Omicron (BA.2)       | Any infection                     | Moderate                | Serious                           | Moderate                                | Low                                                | Low                      | Low                             | Moderate                                 | Serious              |
|                                    | Infection and vaccination vs. naive       | 11                        | Omicron (BA.2)       | Any infection (symptomatic)       | Moderate                | Serious                           | Moderate                                | Low                                                | Low                      | Low                             | Moderate                                 | Serious              |
| Björk (Sweden) <sup>19</sup>       | Infection and vaccination vs. naive       | 3                         | Omicron              | Hospitalization or severe disease | Moderate                | Low                               | Low                                     | Low                                                | Low                      | Low                             | Serious                                  | Serious              |
| Bruel (France) <sup>20</sup>       | Infection and vaccination vs. vaccination | 1                         | Omicron              | Any infection                     | Serious                 | Low                               | Low                                     | Low                                                | Moderate                 | Low                             | Moderate                                 | Serious              |

|                                        |                                                         |    |         |                                   |          |          |     |     |         |          |          |          |
|----------------------------------------|---------------------------------------------------------|----|---------|-----------------------------------|----------|----------|-----|-----|---------|----------|----------|----------|
| Carazo (Canada) <sup>12</sup>          | Infection and vaccination vs. naive <sup>a</sup>        | 8  | Omicron | Any infection                     | Moderate | Serious  | Low | Low | Serious | Low      | Moderate | Serious  |
|                                        | Infection and vaccination vs. infection                 | 2  | Omicron | Any infection                     | Moderate | Serious  | Low | Low | Serious | Low      | Moderate | Serious  |
|                                        | Infection and vaccination vs. infection and vaccination | 1  | Omicron | Any infection                     | Moderate | Serious  | Low | Low | Serious | Low      | Moderate | Serious  |
|                                        | Infection and vaccination vs. naive                     | 8  | Omicron | Hospitalization or severe disease | Moderate | Low      | Low | Low | Low     | Low      | Moderate | Moderate |
|                                        | Infection and vaccination vs. infection                 | 3  | Omicron | Hospitalization or severe disease | Moderate | Low      | Low | Low | Low     | Low      | Moderate | Moderate |
|                                        | Infection and vaccination vs. infection and vaccination | 1  | Omicron | Hospitalization or severe disease | Moderate | Low      | Low | Low | Low     | Low      | Moderate | Moderate |
| Cerqueira-Silva (Brazil) <sup>13</sup> | Infection and vaccination vs. naive                     | 24 | Omicron | Any infection (symptomatic)       | Low      | Moderate | Low | Low | Low     | Low      | Moderate | Moderate |
|                                        | Infection and vaccination vs. infection                 | 24 | Omicron | Any infection (symptomatic)       | Low      | Moderate | Low | Low | Low     | Low      | Moderate | Moderate |
|                                        | Infection and vaccination vs. naive                     | 21 | Omicron | Hospitalization or severe disease | Low      | Low      | Low | Low | Low     | Moderate | Moderate | Moderate |
|                                        | Infection and vaccination vs. infection                 | 21 | Omicron | Hospitalization or severe disease | Low      | Low      | Low | Low | Low     | Moderate | Moderate | Moderate |
| Chin (USA) <sup>14</sup>               | Infection and vaccination vs. naive                     | 4  | Omicron | Any infection                     | Low      | Low      | Low | Low | Low     | Low      | Moderate | Moderate |

|                                 |                                                         |    |         |                 |          |          |          |     |          |          |          |          |
|---------------------------------|---------------------------------------------------------|----|---------|-----------------|----------|----------|----------|-----|----------|----------|----------|----------|
| Lind (USA) <sup>15</sup>        | Infection and vaccination vs. infection                 | 20 | Omicron | Any infection   | Moderate | Low      | Low      | Low | Moderate | Serious  | Moderate | Serious  |
|                                 | Infection and vaccination vs. vaccination               | 1  | Omicron | Any infection   | Moderate | Low      | Low      | Low | Moderate | Serious  | Moderate | Serious  |
| Medić (Serbia) <sup>21</sup>    | Infection and vaccination vs. infection                 | 1  | Omicron | Any infection   | Serious  | Moderate | Low      | Low | Low      | Moderate | Moderate | Serious  |
|                                 | Infection and vaccination vs. infection and vaccination | 2  | Omicron | Any infection   | Serious  | Moderate | Low      | Low | Low      | Moderate | Moderate | Serious  |
| Nielsen (Denmark) <sup>22</sup> | Infection and vaccination vs. infection                 | 12 | Omicron | Any infection   | Moderate | Moderate | Low      | Low | Low      | Serious  | Moderate | Serious  |
| Plumb (USA) <sup>23</sup>       | Infection and vaccination vs. infection                 | 2  | Omicron | Hospitalization | Moderate | Low      | Moderate | Low | Low      | Low      | Moderate | Moderate |
| Shrestha (USA) <sup>24</sup>    | Infection and vaccination vs. infection and vaccination | 1  | Omicron | Any infection   | Serious  | Moderate | Serious  | Low | Low      | Serious  | Moderate | Serious  |
|                                 | Infection and vaccination vs. infection                 | 1  | Omicron | Any infection   | Serious  | Moderate | Serious  | Low | Low      | Serious  | Moderate | Serious  |
| Šmíd (Czech) <sup>18</sup>      | Infection and vaccination vs. naive                     | 8  | Omicron | Any infection   | Moderate | Low      | Low      | Low | Moderate | Low      | Moderate | Moderate |
|                                 | Infection and vaccination vs. naive                     | 6  | Omicron | Hospitalization | Moderate | Low      | Low      | Low | Moderate | Low      | Moderate | Moderate |

**Appendix 8. Summary of results for studies reporting sub-group data by age**

Three prior infection effectiveness studies reported reinfection results by age subgroups. The reported estimates of protection did not differ between age groups.

Three hybrid immunity effectiveness studies reported reinfection results by age subgroups. One study reported that children aged 12-17 and older adults aged 50-69 had more protection from hybrid immunity effectiveness with partial primary series and full primary series than adults aged 18-49. The other reported estimates of protection did not differ between age groups.

| Study                                                                         | Age group | Exposure and comparator                              | Time since last immunological hit | Vaccine | Protection against any infection [95% CI] |
|-------------------------------------------------------------------------------|-----------|------------------------------------------------------|-----------------------------------|---------|-------------------------------------------|
| Carazo (Canada) <sup>12</sup>                                                 | 12-17     | Prior infection vs naïve                             | 90-730 days                       | N/A     | 57% [36-71%]                              |
| Carazo (Canada)                                                               | 18-49     | Prior infection vs naïve                             | 90-730 days                       | N/A     | 44% [29-43%]                              |
| Carazo (Canada)                                                               | 50-69     | Prior infection vs naïve                             | 90-730 days                       | N/A     | 51% [38-60%]                              |
| Carazo (Canada)                                                               | 70+       | Prior infection vs naïve                             | 90-730 days                       | N/A     | 46% [16-65%]                              |
| Carazo (Canada)                                                               | 12-17     | Infection + partial primary series vaccine vs naïve  | 21 days                           | Mixed   | 78% [70-83%]                              |
| Carazo (Canada)                                                               | 18-49     | Infection + partial primary series vaccine vs naïve  | 21 days                           | Mixed   | 62% [60-65%]                              |
| Carazo (Canada)                                                               | 50-69     | Infection + partial primary series vaccine vs naïve  | 21 days                           | Mixed   | 71% [66-75%]                              |
| Carazo (Canada)                                                               | 70+       | Infection + partial primary series vaccine vs naïve  | 21 days                           | Mixed   | 79% [65-87%]                              |
| Carazo (Canada)                                                               | 12-17     | Infection + primary series vs naïve                  | 7 days                            | Mixed   | 79% [74-93%]                              |
| Carazo (Canada)                                                               | 18-49     | Infection + primary series vs naïve                  | 7 days                            | Mixed   | 67% [65-68%]                              |
| Carazo (Canada)                                                               | 50-69     | Infection + primary series vs naïve                  | 7 days                            | Mixed   | 72% [69-74%]                              |
| Carazo (Canada)                                                               | 70+       | Infection + primary series vs naïve                  | 7 days                            | Mixed   | 67% [60-73%]                              |
| Carazo (Canada)                                                               | 12-17     | Infection + 1 <sup>st</sup> booster vaccine vs naïve | 7 days                            | Mixed   | 96% [65-99%]                              |
| Carazo (Canada)                                                               | 18-49     | Infection + 1 <sup>st</sup> booster vaccine vs naïve | 7 days                            | Mixed   | 79% [77-81%]                              |
| Carazo (Canada)                                                               | 50-69     | Infection + 1 <sup>st</sup> booster vaccine vs naïve | 7 days                            | Mixed   | 86% [83-88%]                              |
| Carazo (Canada)                                                               | 70+       | Infection + 1 <sup>st</sup> booster vaccine vs naïve | 7 days                            | Mixed   | 81% [75-86%]                              |
| Andeweg (Netherlands) (Jan to Mar 2022 Cohort, BA.1 infections) <sup>11</sup> | 0-11      | Prior infection vs naïve                             | 180 days                          | N/A     | 41% [34-48%]                              |

|                                                                   |       |                                     |          |       |               |
|-------------------------------------------------------------------|-------|-------------------------------------|----------|-------|---------------|
| Andeweg (Netherlands) (Jan to Mar 2022 Cohort, BA.1 infections)   | 12-17 | Prior infection vs naïve            | 180 days | N/A   | 39% [30-46%]  |
| Andeweg (Netherlands) (Jan to Mar 2022 Cohort, BA.1 infections)   | 18-29 | Prior infection vs naïve            | 180 days | N/A   | 37% [32-42%]  |
| Andeweg (Netherlands) (Jan to Mar 2022 Cohort, BA.1 infections)   | 30-59 | Prior infection vs naïve            | 180 days | N/A   | 35% [31-40%]  |
| Andeweg (Netherlands) (Jan to Mar 2022 Cohort, BA.1 infections)   | 60+   | Prior infection vs naïve            | 180 days | N/A   | 45% [30-57%]  |
| Andeweg (Netherlands) (Jan to Mar 2022 Cohort, BA.1 infections)   | 12-17 | Infection + primary series vs naïve | 180 days | Mixed | 69% [44-83%]  |
| Andeweg (Netherlands) (Jan to Mar 2022 Cohort, BA.1 infections)   | 18-29 | Infection + primary series vs naïve | 180 days | Mixed | 65% [57-72%]  |
| Andeweg (Netherlands) (Jan to Mar 2022 Cohort, BA.1 infections)   | 30-59 | Infection + primary series vs naïve | 180 days | Mixed | 58% [51-65%]  |
| Andeweg (Netherlands) (Jan to Mar 2022 Cohort, BA.1 infections)   | 60+   | Infection + primary series vs naïve | 180 days | Mixed | 71% [48-83%]  |
| Andeweg (Netherlands) (Jan to Mar 2022 Cohort, BA.2 infections)   | 0-11  | Prior infection vs naïve            | 180 days | N/A   | 35% [23-46%]  |
| Andeweg (Netherlands) (Jan to Mar 2022 Cohort, BA.2 infections)   | 12-17 | Prior infection vs naïve            | 180 days | N/A   | 54% [43-63%]  |
| Andeweg (Netherlands) (Jan to Mar 2022 Cohort, BA.2 infections)   | 18-29 | Prior infection vs naïve            | 180 days | N/A   | 43% [37-48%]  |
| Andeweg (Netherlands) (Jan to Mar 2022 Cohort, BA.2 infections)   | 30-59 | Prior infection vs naïve            | 180 days | N/A   | 37% [30-42%]  |
| Andeweg (Netherlands) (Jan to Mar 2022 Cohort, BA.2 infections)   | 60+   | Prior infection vs naïve            | 180 days | N/A   | 45% [24-61%]  |
| Andeweg (Netherlands) (Jan to Mar 2022 Cohort, BA.2 infections)   | 12-17 | Infection + primary series vs naïve | 180 days | Mixed | 81% [56-92%]  |
| Andeweg (Netherlands) (Jan to Mar 2022 Cohort, BA.2 infections)   | 18-29 | Infection + primary series vs naïve | 180 days | Mixed | 67% [57-75%]  |
| Andeweg (Netherlands) (Jan to Mar 2022 Cohort, BA.2 infections)   | 30-59 | Infection + primary series vs naïve | 180 days | Mixed | 62% [52-69%]  |
| Andeweg (Netherlands) (Jan to Mar 2022 Cohort, BA.2 infections)   | 60+   | Infection + primary series vs naïve | 180 days | Mixed | 36% [1-64%]   |
| Andeweg (Netherlands) (Nov 2021 to Jan 2022 Cohort) <sup>11</sup> | 0-11  | Prior infection vs naïve            | 180 days | N/A   | 42% [16-60%]  |
| Andeweg (Netherlands) (Nov 2021 to Jan 2022 Cohort)               | 12-17 | Prior infection vs naïve            | 180 days | N/A   | 37% [6-58%]   |
| Andeweg (Netherlands) (Nov 2021 to Jan 2022 Cohort)               | 18-29 | Prior infection vs naïve            | 180 days | N/A   | 7% [-8-20%]   |
| Andeweg (Netherlands) (Nov 2021 to Jan 2022 Cohort)               | 30-59 | Prior infection vs naïve            | 180 days | N/A   | 5% [-13-20%]  |
| Andeweg (Netherlands) (Nov 2021 to Jan 2022 Cohort)               | 60+   | Prior infection vs naïve            | 180 days | N/A   | 20% [-49-57%] |
| Andeweg (Netherlands) (Nov 2021 to Jan 2022 Cohort)               | 12-17 | Infection + primary series vs naïve | 180 days | Mixed | 50% [1-94%]   |
| Andeweg (Netherlands) (Nov 2021 to Jan 2022 Cohort)               | 18-29 | Infection + primary series vs naïve | 180 days | Mixed | 54% [35-67%]  |
| Andeweg (Netherlands) (Nov 2021 to Jan 2022 Cohort)               | 30-59 | Infection + primary series vs naïve | 180 days | Mixed | 50% [31-64%]  |
| Andeweg (Netherlands) (Nov 2021 to Jan 2022 Cohort)               | 60+   | Infection + primary series vs naïve | 180 days | Mixed | 69% [27-87%]  |

216 **Appendix 9. Sub-group analysis of the protective effectiveness of hybrid immunity by vaccine type**

217

218 Subgroup meta-regression analysis showed differences in the level of protection and patterns of waning protection over time by vaccine type.  
 219 Hybrid immunity effectiveness against hospitalization or severe disease was initially high (>88%) across all vaccine types at 3 months after the  
 220 last immunological challenge. At 6 months the available data showed a maintenance of protection for mRNA vaccines (98.1% [91.2-99.6%]) but  
 221 a greater reduction in protection for a mixture of vaccines (75.5% [13.7-98.4%]). In these studies, mixtures of vaccines could refer to single  
 222 individuals receiving multiple different vaccine products or a group of individuals who collectively received multiple types of vaccine. Hybrid  
 223 immunity effectiveness against reinfection was highest with a primary series of mRNA vaccines (60.9% [48.3-72.2%], n=5 studies), followed by  
 224 mRNA and non-replicating viral vector (60.1% [43.0-75.1%], n=3 studies), non-replicating viral vectors vaccines (40.7% [39.6-41.7%], n=1  
 225 study) and inactivated vaccines (36.2% [34.9-37.4%], n=1 study). There were significant monthly reductions in reinfection from 3 to 6 months for  
 226 mRNA vaccines but no change for mixtures of vaccines, with data being limited for other vaccine types.  
 227

| Vaccine type                     | Exposure                         | Comparator | Severity                          | No. studies | No. estimates | Month 3                         | Month 6                         | Percentage point change in protection from 3 to 6 months [95% CI] |
|----------------------------------|----------------------------------|------------|-----------------------------------|-------------|---------------|---------------------------------|---------------------------------|-------------------------------------------------------------------|
| mRNA <sup>a</sup>                | Prior infection + primary series | Naïve      | Hospitalization or severe disease | 3           | 11            | 97.7% [89.5-99.5%]              | 98.1% [91.2-99.6%]              | -0.47 [-1.4 to +2.0]                                              |
| NRVV <sup>b</sup>                | Prior infection + primary series | Naïve      | Hospitalization or severe disease | 1           | 1             | 93.9% [92.8-94.9%] <sup>e</sup> | 94.5% [93.8-95.1%] <sup>f</sup> | -                                                                 |
| Inactivated <sup>c</sup>         | Prior infection + primary series | Naïve      | Hospitalization or severe disease | 1           | 1             | 88.4% [77.9-93.9%] <sup>e</sup> | 90.7% [89.5-91.8%] <sup>f</sup> | -                                                                 |
| Mixed (NRVV + mRNA) <sup>d</sup> | Prior infection + primary series | Naïve      | Hospitalization or severe disease | 2           | 5             | 89.2% [73.9-96.0%]              | 75.5% [13.7-98.4%]              | -13.6 [-67.0 to -3.8]                                             |
|                                  |                                  |            |                                   |             |               |                                 |                                 |                                                                   |
| mRNA <sup>a</sup>                | Prior infection + primary series | Naïve      | Any Infection                     | 5           | 13            | 68.8% [56.9-78.6%]              | 60.9% [48.3-72.2%]              | -7.9 [-2.0 to -15.7]                                              |
| NRVV <sup>b</sup>                | Prior infection + primary series | Naïve      | Any Infection                     | 1           | 1             | 38.8% [37.7-39.8%] <sup>e</sup> | 40.7% [39.6-41.7%] <sup>f</sup> | -                                                                 |
| Inactivated <sup>c</sup>         | Prior infection + primary series | Naïve      | Any Infection                     | 1           | 1             | 31.0% [29.4-32.5%] <sup>e</sup> | 36.2% [34.9-37.4%] <sup>f</sup> | -                                                                 |
| Mixed (NRVV + mRNA) <sup>d</sup> | Prior infection + primary series | Naïve      | Any Infection                     | 3           | 33            | 70.8% [55.1-82.8%]              | 60.1% [43.0-75.1%]              | -10.7 [-4.5 to +24.8]                                             |

228 <sup>a</sup>mRNA vaccine type contain Pfizer and Moderna; <sup>b</sup>NRVV (Non-replicating viral vector) vaccine type contain AstraZeneca; <sup>c</sup>Inactivated type of vaccine refers to  
 229 CoronaVac; <sup>d</sup>Mixed vaccine type refers to Pfizer, Moderna, AstraZeneca, and Johnson & Johnson (i.e., mRNA and NRVV). <sup>e</sup>Single estimate at week 10-19 from  
 230 Cerqueira-Silva (Brazil). <sup>f</sup>Single estimate at over 20 weeks from Cerqueira-Silva (Brazil).  
 231

232 **Appendix 10. Sub-group analysis of the protective effectiveness of prior infection and hybrid immunity by prior infection**  
 233 **variant**  
 234

235 Subgroup meta-regression analysis of the protective effectiveness of prior infection and hybrid immunity by variant causing the index infection  
 236 was limited to protection from Alpha, Delta, and mixed pre-omicron variants, including Alpha and Delta. Data at 6 months showed no differences  
 237 in the level of protection by the variant causing the index infection.  
 238

| Prior infection variant | Exposure                   | Comparator | Severity                          | Number of studies | Number of estimates | Month 3                         | Month 6                         |
|-------------------------|----------------------------|------------|-----------------------------------|-------------------|---------------------|---------------------------------|---------------------------------|
| <b>Prior infection</b>  |                            |            |                                   |                   |                     |                                 |                                 |
| Alpha                   | Infection                  | Naïve      | Hospitalization or severe disease | 1                 | 1                   | -                               | 66.0% [54.0-75.0%] <sup>c</sup> |
| Delta                   | Infection                  | Naïve      | Hospitalization or severe disease | 2                 | 4                   | 74.7% [60.6-85.1%]              | -                               |
| Mixed variant           | Infection                  | Naïve      | Hospitalization or severe disease | 5                 | 8                   | 77.7% [62.5-87.9%]              | 77.4% [66.6-85.5%]              |
| Alpha                   | Infection                  | Naïve      | Any Infection                     | 1                 | 4                   | 64.2% [60.3-67.9%]              | 52.8% [50.1-55.5%]              |
| Delta                   | Infection                  | Naïve      | Any Infection                     | 3                 | 5                   | 65.5% [29.5-89.6%]              | 55.3% [22.0-84.4%]              |
| Mixed variant           | Infection                  | Naïve      | Any Infection                     | 8                 | 54                  | 60.8% [44.6-75.0%]              | 47.4% [31.9-63.5%]              |
| <b>Hybrid immunity</b>  |                            |            |                                   |                   |                     |                                 |                                 |
| Alpha                   | Infection + primary series | Naïve      | Hospitalization or severe disease | 1                 | 1                   | 94.0% [77.0-95.0%] <sup>a</sup> | -                               |
| Delta                   | Infection + primary series | Naïve      | Hospitalization or severe disease | 1                 | 1                   | 93.0% [49.0-99.0%] <sup>b</sup> | -                               |
| Mixed variant           | Infection + primary series | Naïve      | Hospitalization or severe disease | 4                 | 21                  | 96.4% [86.9-99.1%]              | 96.8% [88.3-99.2%]              |
| Alpha                   | Infection + primary series | Naïve      | Any Infection                     | 1                 | 1                   | 75.6% [74.6-76.7%] <sup>a</sup> | -                               |
| Delta                   | Infection + primary series | Naïve      | Any Infection                     | 5                 | 19                  | 79.6% [61.8-90.4%]              | 62.4% [40.6-80.1%]              |
| Mixed variant           | Infection + primary series | Naïve      | Any Infection                     | 5                 | 35                  | 63.7% [53.9-72.5%]              | 54.8% [44.6-64.5%]              |

239 <sup>a</sup>Single estimate at month 1 from Šmíd 2 (Czechia). <sup>b</sup>Single estimate at month 2 from Šmíd 2 (Czechia). <sup>c</sup>Single estimate at month 10 from Šmíd 1 (Czech).  
 240  
 241  
 242  
 243

## Appendix 11. Sensitivity analysis of the protection conferred by prior infection and hybrid immunity compared to immune naïve for studies at different risk of bias

| Severity of Infection                                         | No. studies | No. estimates | Month 1 <sup>a</sup>  | Month 2 <sup>b</sup>  | Month 3               | Month 4               | Month 6                            | Month 9               | Month 12                           | Month 15              | Percentage point change in protection from 3 to 6 months [95% CI] <sup>c</sup> | Percentage point change in protection from 3 to 12 months [95% CI] <sup>c</sup> |
|---------------------------------------------------------------|-------------|---------------|-----------------------|-----------------------|-----------------------|-----------------------|------------------------------------|-----------------------|------------------------------------|-----------------------|--------------------------------------------------------------------------------|---------------------------------------------------------------------------------|
| <b>Prior Infection</b>                                        |             |               |                       |                       |                       |                       |                                    |                       |                                    |                       |                                                                                |                                                                                 |
| Hospitalization or severe disease<br><b>All studies</b>       | 6           | 16            | NA                    | 83.2%<br>[72.1-90.5%] | 82.5%<br>[71.8-89.7%] | 81.7%<br>[71.4-88.9%] | 80.1%<br>[70.3-87.2%]              | 77.5%<br>[67.5-85.1%] | 74.6%<br>[63.1-83.5%]              | 71.6%<br>[57.1-82.6%] | -2.4<br>[-5.1 to +4.7]                                                         | -7.8<br>[-20.9 to +12.1]                                                        |
| Hospitalization or severe disease<br><b>Moderate RoB only</b> | 4           | 13            | NA                    | 77.9%<br>[63.0-87.9%] | 77.5%<br>[64.2-86.9%] | 77.1%<br>[65.3-85.8%] | 76.4%<br>[67.1-83.7%]              | 77.3%<br>[68.4-81.1%] | 74.1%<br>[66.4-80.6%]              | 72.9%<br>[61.4-82.0%] | -                                                                              | -                                                                               |
| Any Infection <sup>d</sup><br><b>All studies</b>              | 10          | 64            | NA                    | 69.5%<br>[57.6-79.2%] | 65.2%<br>[52.9-75.9%] | 60.7%<br>[48.7-71.6%] | 51.2%<br>[38.6-63.7%]              | 37.0%<br>[26.0-49.6%] | 24.7%<br>[16.4-35.5%]              | 15.5%<br>[9.9-23.6%]  | -14.0<br>[-12.0 to -18.2]                                                      | -40.5<br>[-33.9 to -51.9]                                                       |
| Any Infection <sup>d</sup><br><b>Moderate RoB only</b>        | 6           | 17            | NA                    | 69.2%<br>[58.0-78.6%] | 65.1%<br>[53.4-75.3%] | 60.7%<br>[48.7-71.6%] | 51.5%<br>[39.5-63.4%]              | 37.7%<br>[27.1-49.6%] | 25.6%<br>[17.4-35.9%]              | 16.4%<br>[10.7-24.2%] | -                                                                              | -                                                                               |
| <b>Hybrid Immunity - Primary Series</b>                       |             |               |                       |                       |                       |                       |                                    |                       |                                    |                       |                                                                                |                                                                                 |
| Hospitalization or severe disease<br><b>All studies</b>       | 5           | 23            | 95.7%<br>[88.0-98.5%] | 95.9%<br>[88.5-98.6%] | 96.0%<br>[89.0-98.6%] | 96.2%<br>[89.4-98.7%] | 96.5%<br>[90.2-98.8%]              | 97.0%<br>[90.9-99%]   | 97.4%<br>[91.4-99.2%] <sup>e</sup> | NA                    | +0.50<br>[-2.2 to +2.1]                                                        | +1.3<br>[-4.3 to +7.4]                                                          |
| Hospitalization or severe disease<br><b>Moderate RoB only</b> | 4           | 20            | 96.6%<br>[89.3-99.0%] | 96.8%<br>[89.8-99.0%] | 96.9%<br>[90.3-99.1%] | 97.1%<br>[90.7-99.1%] | 97.3%<br>[91.3-99.2%]              | 97.7%<br>[92.1-99.3%] | 98.0%<br>[92.5-99.5%] <sup>e</sup> | NA                    | -                                                                              | -                                                                               |
| Any Infection<br><b>All studies</b>                           | 7           | 55            | 74.1%<br>[64.8-81.6%] | 71.6%<br>[61.9-79.6%] | 69.0%<br>[58.9-77.5%] | 66.2%<br>[55.8-75.3%] | 60.4%<br>[49.6-70.3%]              | 51.1%<br>[40.2-61.9%] | 41.8%<br>[31.5-52.8%] <sup>e</sup> | NA                    | -8.6<br>[-1.7 to -17.2]                                                        | -27.2<br>[-6.4 to -53.2]                                                        |
| Any Infection<br><b>Moderate RoB only</b>                     | 4           | 20            | 77.8%<br>[62.7-88.0%] | 74.7%<br>[58.6-86.0%] | 71.3%<br>[54.4-83.8%] | 67.7%<br>[50.1-81.3%] | 59.7%<br>[41.6-75.5%]              | 46.9%<br>[29.8-64.9%] | 34.5%<br>[20.1-52.5%] <sup>e</sup> | NA                    | -                                                                              | -                                                                               |
| <b>Hybrid Immunity – First Booster</b>                        |             |               |                       |                       |                       |                       |                                    |                       |                                    |                       |                                                                                |                                                                                 |
| Hospitalization or severe disease<br><b>All studies</b>       | 4           | 17            | 98.0%<br>[92.9-99.5%] | 97.6%<br>[91.6-99.4%] | 97.2%<br>[90.0-99.3%] | 96.7%<br>[87.9-99.1%] | 95.3%<br>[81.9-98.9%] <sup>e</sup> | NA                    | NA                                 | NA                    | -1.8<br>[-10.3 to +0.77]                                                       | NA                                                                              |
| Hospitalization or severe disease<br><b>Moderate RoB only</b> | 4           | 17            | 98.0%<br>[92.9-99.5%] | 97.6%<br>[91.6-99.4%] | 97.2%<br>[90.0-99.3%] | 96.7%<br>[87.9-99.1%] | 95.3%<br>[81.9-98.9%] <sup>e</sup> | NA                    | NA                                 | NA                    |                                                                                |                                                                                 |
| Any Infection<br><b>All studies</b>                           | 6           | 24            | 80.1%<br>[72.5-86%]   | 74.8%<br>[66.0-81.9%] | 68.6%<br>[58.8-76.9%] | 61.6%<br>[51.2-71.1%] | 46.5%<br>[36.0-57.3%] <sup>e</sup> | NA                    | NA                                 | NA                    | -22.0<br>[-4.3 to -38.8]                                                       | NA                                                                              |
| Any Infection<br><b>Moderate RoB only</b>                     | 4           | 19            | 78.4%<br>[66.0-87.2%] | 72.2%<br>[58.0-83.0%] | 64.9%<br>[49.6-77.6%] | 61.6%<br>[51.2-71.1%] | 40.1%<br>[26.1-55.9%] <sup>e</sup> | NA                    | NA                                 | NA                    | -                                                                              | -                                                                               |

244 This table displays a sensitivity analysis for the point estimates and 95% CIs of protection shown in Figure 2. This analysis used a log-odds meta-regression model. <sup>a</sup>Month 1 data were for persons with hybrid  
245 immunity whose last immunological challenge was vaccination and thus were eligible for reinfection within a shorter time frame than people who most recently had prior infection (2 month minimum for  
246 probable reinfection). <sup>b</sup>Month 2 data represent the minimum time period for a reinfection among persons with prior infection (i.e., possible reinfection). <sup>c</sup>Confidence intervals calculated using the bootstrap  
247 method. Percentage point changes over time are reported from 3 months as this represents probable and confirmed reinfections. <sup>d</sup>Any infections contained mild infections, symptomatic infections and



248 asymptomatic infections °Model predictions beyond the range of the available data. NA: insufficient data for model extrapolation. Prior infection data is available for 2-16 month predictions; hybrid immunity  
249 data was available for 1-11 month predictions. Data were extrapolated to a maximum of 3 months beyond the final follow-up date. Abbreviations: RoB= risk of bias; N/A= not applicable.

250  
251  
252  
253

## Appendix 12. Sensitivity analysis of protection conferred by prior infection or hybrid immunity over time using the WHO definition of severe disease

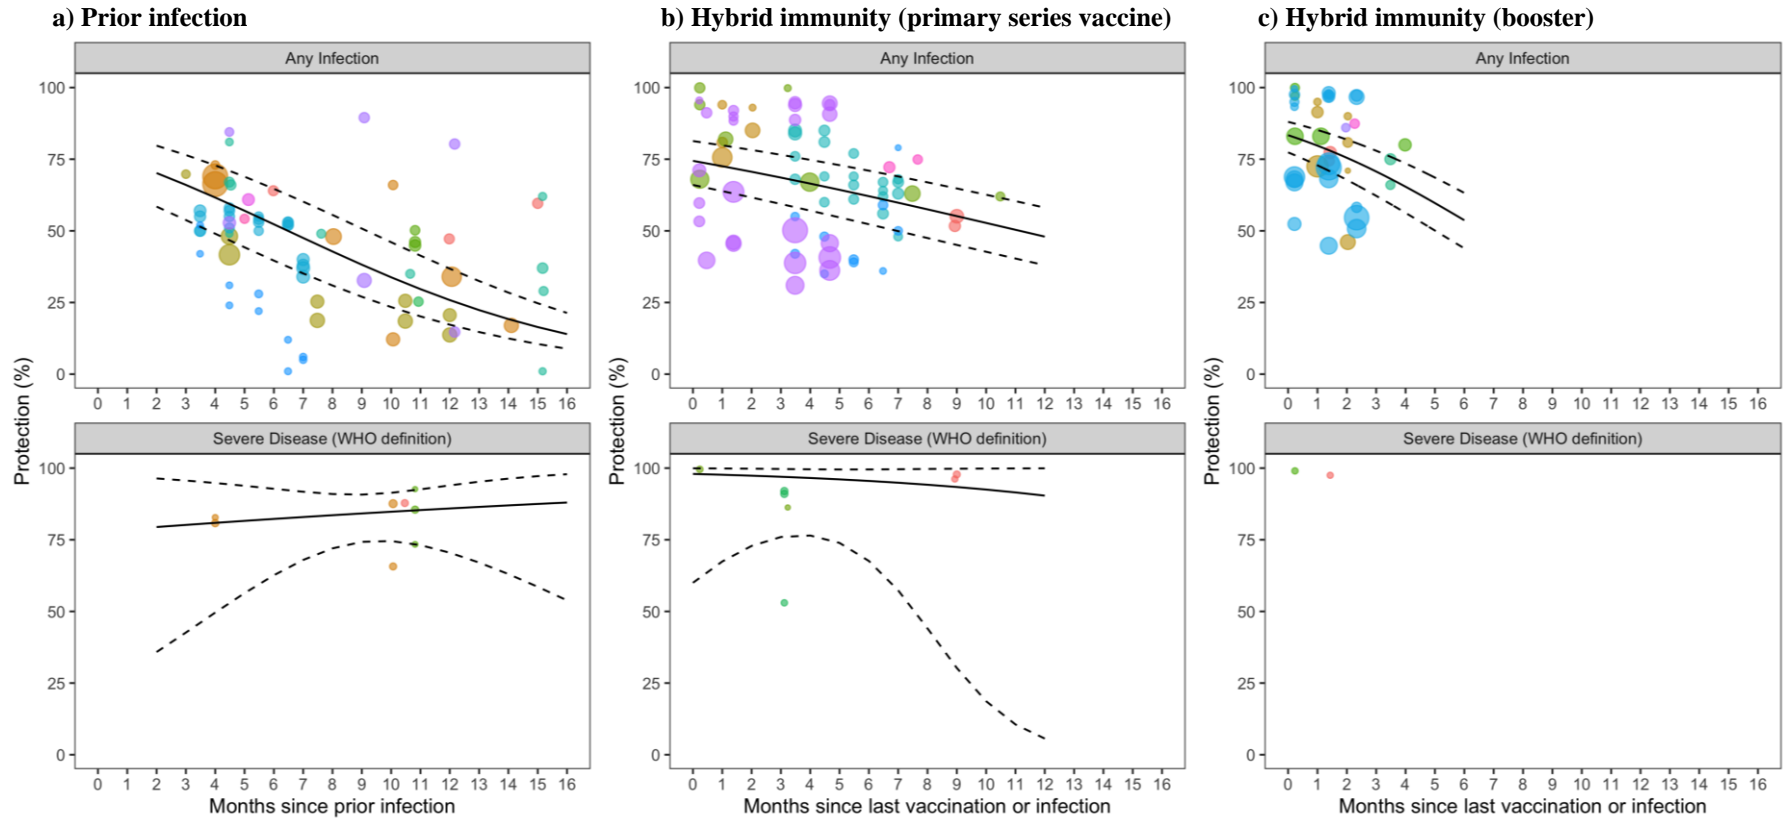

254  
255  
256

Points of the same color represent estimates from the same study. The diameter of points varies with the sample size of the study.

257  
258

**Appendix 13. Sensitivity analysis of the protection against reinfection and severe disease conferred by the primary-series vaccine, first booster vaccine, prior infection, and hybrid immunity compared to immune naive**

| Severity of Infection                   | No. studies | No. estimates | Month 1 <sup>a</sup>  | Month 2 <sup>b</sup>  | Month 3               | Month 4               | Month 6               | Month 9               | Month 12              | Month 15              | Percentage point change in protection from 3 to 6 months [95% CI] <sup>c</sup> | Percentage point change in protection from 3 to 12 months [95% CI] <sup>c</sup> |
|-----------------------------------------|-------------|---------------|-----------------------|-----------------------|-----------------------|-----------------------|-----------------------|-----------------------|-----------------------|-----------------------|--------------------------------------------------------------------------------|---------------------------------------------------------------------------------|
| <b>Prior Infection</b>                  |             |               |                       |                       |                       |                       |                       |                       |                       |                       |                                                                                |                                                                                 |
| Severe Disease                          | 3           | 8             | NA                    | 79.4%<br>[35.8-96.4%] | 80.2%<br>[42.6-95.7%] | 80.9%<br>[49.6-94.8%] | 82.3%<br>[62.6-92.8%] | 84.2%<br>[74.3-90.7%] | 85.9%<br>[70.5-94%]   | 87.5%<br>[58.6-97.2%] | -2.4<br>[-4.7 to +5.1]                                                         | -7.8<br>[-12.1 to +20.9]                                                        |
| Any Infection <sup>d</sup>              | 10          | 72            | NA                    | 70.2%<br>[58.5-79.7%] | 66%<br>[53.8-76.5%]   | 61.6%<br>[49-72.8%]   | 52.3%<br>[39.6-64.7%] | 38.2%<br>[27-50.8%]   | 25.8%<br>[17.3-36.8%] | 16.4%<br>[10.5-24.7%] | -14.0<br>[-12.0 to -18.2]                                                      | -40.5<br>[-33.9 to -51.9]                                                       |
| <b>Hybrid Immunity - Primary Series</b> |             |               |                       |                       |                       |                       |                       |                       |                       |                       |                                                                                |                                                                                 |
| Severe Disease                          | 3           | 7             | 97.7%<br>[67.4-99.9%] | 97.4%<br>[72.8-99.8%] | 97%<br>[76-99.7%]     | 96.6%<br>[76.5-99.6%] | 95.5%<br>[67.6-99.5%] | 93.4%<br>[30.3-99.8%] | 90.4%<br>[5.6-99.9%]  | NA                    | -1.5<br>[-3.4 to +11.5]                                                        | -6.6<br>[-20.9 to +17.8]                                                        |
| Any Infection                           | 7           | 71            | 72.6%<br>[63.9-79.8%] | 70.6%<br>[61.6-78.2%] | 68.6%<br>[59.4-76.5%] | 66.5%<br>[57.7-74.8%] | 62.1%<br>[52.3-71%]   | 55.1%<br>[45.1-64.8%] | 48.0%<br>[38.0-58.1%] | NA                    | -6.5<br>[-15.1 to +4.9]                                                        | -20.6<br>[-48.8 to +11.4]                                                       |
| <b>Hybrid Immunity - First Booster</b>  |             |               |                       |                       |                       |                       |                       |                       |                       |                       |                                                                                |                                                                                 |
| Severe Disease                          | 2           | 2             | 98.2%<br>[85.5-99.8%] | 96.1%<br>[17.4-100%]  | NA                    | NA                    | NA                    | NA                    | NA                    | NA                    | NA                                                                             | NA                                                                              |
| Any Infection                           | 6           | 39            | 79.7%<br>[72.9-85.2%] | 75.5%<br>[67.8-81.8%] | 70.7%<br>[62.2-77.9%] | 65.4%<br>[56.3-73.5%] | 53.7%<br>[43.9-63.2%] | NA                    | NA                    | NA                    | NA                                                                             | NA                                                                              |

259  
260  
261  
262  
263  
264  
265

This table displays the data shown in Figure S9. This analysis uses the same log-odds meta-regression model as Figure 2. <sup>a</sup>Month 1 data were for persons with hybrid immunity whose last immunological challenge was vaccination and thus were eligible for reinfection within a shorter time frame than people who most recently had prior infection (2 month minimum for probable reinfection). <sup>b</sup>Month 2 data represented the minimum time period for an infection among persons with prior infection. <sup>c</sup>Confidence intervals calculated using the bootstrap method. <sup>d</sup>Any infection contained mild infections, symptomatic infections and asymptomatic infections. NA: insufficient data for model extrapolation. Prior infection data was available for 2-16 month predictions; hybrid immunity data was available for 1-11 month predictions. Data were extrapolated to a maximum of 3 months beyond the final follow-up date.

## Appendix 14. Definitions of severe disease in included studies

| First Author (Country)                 | Types of exposures                  | Sensitivity defined as severe, critical, or fatal COVID-19 | Severe disease definition                                                                                                                                                             |
|----------------------------------------|-------------------------------------|------------------------------------------------------------|---------------------------------------------------------------------------------------------------------------------------------------------------------------------------------------|
| Altarawneh 1 (Qatar) <sup>9</sup>      | Prior infection                     | Yes                                                        | Severe, critical, or fatal COVID-19 as defined per the WHO classification.                                                                                                            |
| Altarawneh 2 (Qatar) <sup>10</sup>     | Prior infection and Hybrid immunity | Yes                                                        | Severe, critical, or fatal COVID-19 as defined per the WHO classification.                                                                                                            |
| Andeweg (Netherland) <sup>11</sup>     | Prior infection and Hybrid immunity | No                                                         | N/A                                                                                                                                                                                   |
| Björk (Sweden) <sup>19</sup>           | Hybrid immunity                     | Yes                                                        | A case who was hospitalised for at least 24 h from 5 days before until 14 days after a positive SARS-CoV-2 test and required oxygen supply ( $\geq 5$ L/min) or admittance to an ICU. |
| Bruel (France) <sup>20</sup>           | Hybrid immunity                     | No                                                         | N/A                                                                                                                                                                                   |
| Carazo (Canada) <sup>12</sup>          | Prior infection and Hybrid immunity | No                                                         | COVID-19 hospitalization, defined by admission, $\geq 24$ -hours and within 14 days of a SARS-CoV-2 positive specimen                                                                 |
|                                        |                                     | Yes                                                        | COVID-19 death                                                                                                                                                                        |
| Cerqueira-Silva (Brazil) <sup>13</sup> | Prior infection and Hybrid immunity | No                                                         | N/A                                                                                                                                                                                   |
| Chin (USA) <sup>14</sup>               | Prior infection and Hybrid immunity | No                                                         | N/A                                                                                                                                                                                   |
| Lind (USA) <sup>15</sup>               | Prior infection and Hybrid immunity | No                                                         | N/A                                                                                                                                                                                   |
| Medić (Serbia) <sup>21</sup>           | Prior infection and Hybrid immunity | Yes                                                        | COVID-19 pneumonia confirmed by chest imaging                                                                                                                                         |
|                                        |                                     | Yes                                                        | COVID-19 pneumonia required mechanical ventilation and/or admission to the ICU                                                                                                        |
| Michlmayr (Denmark) <sup>16</sup>      | Prior infection                     | No                                                         | Hospital admission associated with ICD-10 primary diagnosis codes occurring no earlier than two days before, and no later than 14 days after a positive RT-PCR test.                  |
| Nielsen (Denmark) <sup>22</sup>        | Hybrid immunity                     | No                                                         | N/A                                                                                                                                                                                   |
| Nyberg (UK) <sup>17</sup>              | Prior infection                     | No                                                         | Any hospital attendances, including admissions and attendances at accident and emergency departments, 0–14 days after the first specimen date of the most recent infection episode.   |
|                                        | Prior infection                     | No                                                         | Hospital attendances, admissions and diagnoses during hospital stay                                                                                                                   |
|                                        |                                     | Yes                                                        | Death occurring 0–28 days after the first positive specimen date of the most recent infection episode, again matching the definition used in routine UK government reporting.         |
| Plumb (USA) <sup>23</sup>              | Hybrid immunity                     | No                                                         | At least one hospital admission for a COVID-19-like illness, with a hospitalization-associated NAAT performed from 10 days before through 3 days after admission.                     |
|                                        |                                     | No                                                         | COVID-19-like illness: acute respiratory illness or related signs or symptoms using diagnosis codes from the ICD-10                                                                   |
| Shrestha (USA) <sup>24</sup>           | Hybrid immunity                     | No                                                         | N/A                                                                                                                                                                                   |
| Šmíd (Czech) <sup>18</sup>             | Prior infection and Hybrid Immunity | No                                                         | Hospital admission of a person, who tested positive on a PCR test, within two weeks after the confirmed infection or earlier                                                          |
|                                        |                                     | Yes                                                        | Admission to ICU during the hospitalization.                                                                                                                                          |
|                                        |                                     | Yes                                                        | Use of any type of oxygen therapy                                                                                                                                                     |

268 **Appendix 15. Six-month protection against reinfection and severe disease conferred by the**  
 269 **primary-series vaccine, first booster vaccine, prior infection, and hybrid immunity**  
 270 **compared to immune naive individuals**

271  
272

| Group                                    | Number of studies | Six-month protection | p-value     |
|------------------------------------------|-------------------|----------------------|-------------|
| <b>Hospitalization or severe disease</b> |                   |                      |             |
| Primary series vaccine                   | 12                | 64.6% [54.5-73.6%]   | <0.0001     |
| First booster vaccine                    | 10                | 76.7% [72.5-80.4%]   | <0.0001     |
| Prior infection                          | 6                 | 80.1% [70.3-87.2%]   | 0.01        |
| Hybrid immunity (primary series vaccine) | 5                 | 96.5% [90.2-98.8%]   | <i>ref.</i> |
| Hybrid immunity (first booster)          | 4                 | 95.3% [81.9-98.9%]   | 0.75        |
| <b>Any infection</b>                     |                   |                      |             |
| Primary series vaccine                   | 15                | 15.1% [11.3-19.8%]   | <0.0001     |
| First booster vaccine                    | 9                 | 24.8% [18.5-32.5%]   | <0.0001     |
| Prior infection                          | 10                | 51.2% [38.6-63.7%]   | 0.28        |
| Hybrid immunity (primary series vaccine) | 7                 | 60.4% [49.6-70.3%]   | <i>ref.</i> |
| Hybrid immunity (first booster)          | 6                 | 46.5% [36.0-57.3%]   | 0.08        |

273 Vaccine effectiveness raw data was obtained from a previous systematic review.<sup>6</sup> To obtain six-month protection, we ran a log-  
 274 odds meta-regression model on all of the data allowing for different slopes and intercepts for each group and a random intercept  
 275 for each study. We centered the month variable by subtracting six from the number of months such that the intercept for each  
 276 group represents the protection at six months. See also Figure 3.

## Appendix 16. Characteristics of vaccine effectiveness studies

| Characteristic                                                     | Vaccine effectiveness studies                   |
|--------------------------------------------------------------------|-------------------------------------------------|
|                                                                    | Primary or booster vaccination vs. Immune-naïve |
|                                                                    | N = 19 <sup>a</sup><br>n (%)                    |
| <b>Study design</b>                                                |                                                 |
| Cohort                                                             | 5 (26%)                                         |
| Cross-sectional                                                    | 0 (0%)                                          |
| Test-negative design case-control                                  | 14 (74%)                                        |
| Traditional case-control                                           | 0 (0%)                                          |
| <b>Vaccine-specific estimates</b>                                  | 99                                              |
| Primary series                                                     | 48                                              |
| Booster                                                            | 51                                              |
| <b>Study population</b>                                            |                                                 |
| General population                                                 | 18 (95%)                                        |
| Healthcare workers                                                 | 1 (5%)                                          |
| <b>WHO region</b>                                                  |                                                 |
| AFR                                                                | 1 (5%)                                          |
| AMR                                                                | 9 (47%)                                         |
| EMR                                                                | 1 (5%)                                          |
| EUR                                                                | 8 (42%)                                         |
| SEAR                                                               | 0 (0%)                                          |
| WPR                                                                | 0 (0%)                                          |
| Reported the time interval since final dose (days)                 | 19 (100%)                                       |
| <b>Primary series vaccination<sup>b</sup></b>                      |                                                 |
| Inactivated: Sinovac-CoronaVac                                     | 1 (5%)                                          |
| mRNA: Pfizer/BioNTech-Comirnaty                                    | 16 (84%)                                        |
| mRNA: Moderna-mRNA-1273                                            | 6 (32%)                                         |
| mRNA: Pfizer/BioNTech-Comirnaty + Moderna-mRNA-1273                | 8 (42%)                                         |
| NRVV: AstraZeneca-Vaxzevria                                        | 6 (32%)                                         |
| NRVV: Janssen-Ad26.COVS.2                                          | 2 (11%)                                         |
| Mixed (Inactivated + NRVV + mRNA)                                  | 0 (0%)                                          |
| <b>First booster vaccination<sup>b</sup></b>                       |                                                 |
| Inactivated: Sinovac-CoronaVac                                     | 1 (5%)                                          |
| mRNA: Pfizer/BioNTech-Comirnaty                                    | 10 (53%)                                        |
| mRNA: Moderna-mRNA-1273                                            | 8 (42%)                                         |
| mRNA: Pfizer/BioNTech-Comirnaty + Moderna-mRNA-1273                | 6 (32%)                                         |
| NRVV: AstraZeneca-Vaxzevria                                        | 0 (0%)                                          |
| NRVV: Janssen-Ad26.COVS.2                                          | 1 (5%)                                          |
| Mixed (Inactivated + NRVV + mRNA)                                  | 0 (0%)                                          |
| <b>Infection severity</b>                                          |                                                 |
| Any reinfection                                                    | 17 (89%)                                        |
| Severe disease (includes hospitalisation)                          | 12 (63%)                                        |
| Severe disease (as per WHO definition)                             | 1 (5%)                                          |
| <b>Adjustment of primary estimate</b>                              |                                                 |
| Population characteristics only                                    | 19 (100%)                                       |
| Other characteristics (e.g., time, socioeconomic status, location) | 16 (84%)                                        |
| <b>Risk of bias</b>                                                |                                                 |
| Moderate                                                           | 16 (84%)                                        |
| Serious                                                            | 3 (16%)                                         |

278 <sup>a</sup>Characteristics of 19 studies from 18 articles were reported by the authors of the systematic review.(6) <sup>b</sup>One study presented  
279 estimates separately from two different countries and was counted twice. Abbreviations: WHO= World Health Organization;  
280 AFR=African Region; AMR=Region of the Americas; EMR=Eastern Mediterranean Region; EUR=European Region;  
281 SEAR=South-East Asian Region; WPR=Western Pacific Region; mRNA= messenger ribonucleic acid; NRVV=non-replicating  
282 viral vector.  
283  
284

285 **Appendix 17. References for the supplement**

- 286 1. CADTH COVID-19 Search Strings. CADTH Covid-19 Evidence Portal. Accessed September  
287 2, 2022. <https://covid.cadth.ca/literature-searching-tools/cadth-covid-19-search-strings/>
- 288 2. World Health Organization. WHO COVID-19 Case definition - Updated in Public health  
289 surveillance for COVID-19. Published July 22, 2022. Accessed September 2, 2022.  
290 [https://www.who.int/publications-detail-redirect/WHO-2019-nCoV-](https://www.who.int/publications-detail-redirect/WHO-2019-nCoV-Surveillance_Case_Definition-2022.1)  
291 [Surveillance\\_Case\\_Definition-2022.1](https://www.who.int/publications-detail-redirect/WHO-2019-nCoV-Surveillance_Case_Definition-2022.1)
- 292 3. World Health Organization. *Living Guidance for Clinical Management of COVID-19*; 2021.  
293 [https://apps.who.int/iris/bitstream/handle/10665/349321/WHO-2019-nCoV-clinical-2021.2-](https://apps.who.int/iris/bitstream/handle/10665/349321/WHO-2019-nCoV-clinical-2021.2-eng.pdf)  
294 [eng.pdf](https://apps.who.int/iris/bitstream/handle/10665/349321/WHO-2019-nCoV-clinical-2021.2-eng.pdf)
- 295 4. World Health Organization. *International Guidelines for Certification and Classification*  
296 *(Coding) of COVID-19 as Cause of Death*.  
297 [https://www.who.int/publications/m/item/international-guidelines-for-certification-and-](https://www.who.int/publications/m/item/international-guidelines-for-certification-and-classification-(coding)-of-covid-19-as-cause-of-death)  
298 [classification-\(coding\)-of-covid-19-as-cause-of-death](https://www.who.int/publications/m/item/international-guidelines-for-certification-and-classification-(coding)-of-covid-19-as-cause-of-death)
- 299 5. Higdon MM, Baidya A, Walter KK, et al. Duration of effectiveness of vaccination against  
300 COVID-19 caused by the omicron variant. *Lancet Infect Dis*. 2022;22(8):1114-1116.  
301 doi:10.1016/S1473-3099(22)00409-1
- 302 6. Szanyi J, Wilson T, Scott N, Blakely T. A log-odds system for waning and boosting of  
303 COVID-19 vaccine effectiveness. *Vaccine*. 2022;40(28):3821-3824.  
304 doi:10.1016/j.vaccine.2022.05.039
- 305 7. Zhang J, Yu KF. What's the Relative Risk? A Method of Correcting the Odds Ratio in Cohort  
306 Studies of Common Outcomes. *JAMA*. 1998;280(19):1690-1691.  
307 doi:10.1001/jama.280.19.1690
- 308 8. Altarawneh HN, Chemaitelly H, Hasan MR, et al. Protection against the Omicron Variant  
309 from Previous SARS-CoV-2 Infection. *N Engl J Med*. 2022;386(13):1288-1290.  
310 doi:10.1056/NEJMc2200133
- 311 9. Altarawneh HN, Chemaitelly H, Ayoub HH, et al. Effects of Previous Infection and  
312 Vaccination on Symptomatic Omicron Infections. *N Engl J Med*. 2022;387(1):21-34.  
313 doi:10.1056/NEJMoa2203965
- 314 10. Andeweg SP, de Gier B, Eggink D, et al. Protection of COVID-19 vaccination and previous  
315 infection against Omicron BA.1, BA.2 and Delta SARS-CoV-2 infections. *medRxiv*.  
316 Published online January 1, 2022:2022.02.06.22270457. doi:10.1101/2022.02.06.22270457
- 317 11. Carazo S, Skowronski DM, Brisson M, et al. Protection against Omicron re-infection  
318 conferred by prior heterologous SARS-CoV-2 infection, with and without mRNA vaccination.  
319 *medRxiv*. Published online January 1, 2022:2022.04.29.22274455.  
320 doi:10.1101/2022.04.29.22274455

- 321 12. Cerqueira-Silva T, de Araujo Oliveira V, Paixão ES, et al. Vaccination plus previous  
322 infection: protection during the omicron wave in Brazil. *Lancet Infect Dis.* 2022;22(7):945-  
323 946. doi:10.1016/S1473-3099(22)00288-2
- 324 13. Chin ET, Leidner D, Lamson L, et al. Protection against Omicron conferred by mRNA  
325 primary vaccine series, boosters, and prior infection. *medRxiv.* Published online January 1,  
326 2022:2022.05.26.22275639. doi:10.1101/2022.05.26.22275639
- 327 14. Lind ML, Robertson AJ, Silva J, et al. Effectiveness of Primary and Booster COVID-19  
328 mRNA Vaccination against Omicron Variant SARS-CoV-2 Infection in People with a Prior  
329 SARS-CoV-2 Infection. *medRxiv.* Published online January 1, 2022:2022.04.19.22274056.  
330 doi:10.1101/2022.04.19.22274056
- 331 15. Michlmayr D, Hansen CH, Gubbels SM, et al. Observed protection against SARS-CoV-2  
332 reinfection following a primary infection: A Danish cohort study among unvaccinated using  
333 two years of nationwide PCR-test data. *Lancet Reg Health - Eur.* 2022;20:100452.  
334 doi:10.1016/j.lanepe.2022.100452
- 335 16. Nyberg T, Ferguson NM, Nash SG, et al. Comparative analysis of the risks of hospitalisation  
336 and death associated with SARS-CoV-2 omicron (B.1.1.529) and delta (B.1.617.2) variants in  
337 England: a cohort study. *The Lancet.* 2022;399(10332):1303-1312. doi:10.1016/S0140-  
338 6736(22)00462-7
- 339 17. Šmíd M, Berec L, Příbylová L, et al. Protection by Vaccines and Previous Infection Against  
340 the Omicron Variant of Severe Acute Respiratory Syndrome Coronavirus 2. *J Infect Dis.*  
341 Published online April 28, 2022:jiac161. doi:10.1093/infdis/jiac161
- 342 18. Björk J, Bonander C, Moghaddassi M, et al. COVID-19 vaccine effectiveness against severe  
343 disease from SARS-CoV-2 Omicron BA.1 and BA.2 subvariants – surveillance results from  
344 southern Sweden, December 2021 to March 2022. *Eurosurveillance.* 2022;27(18):2200322.
- 345 19. Bruel T, Pinaud L, Tondeur L, et al. SARS-CoV-2 Omicron neutralization and risk of  
346 infection among elderly after a booster dose of Pfizer vaccine. *medRxiv.* Published online  
347 January 1, 2022:2022.03.30.22273175. doi:10.1101/2022.03.30.22273175
- 348 20. Medić S, Anastassopoulou C, Lozanov-Crvenković Z, et al. Risk and severity of SARS-CoV-  
349 2 reinfections during 2020–2022 in Vojvodina, Serbia: A population-level observational  
350 study. *Lancet Reg Health - Eur.* 2022;20:100453. doi:10.1016/j.lanepe.2022.100453
- 351 21. Nielsen KF, Moustsen-Helms IR, Schelde AB, et al. Vaccine effectiveness against SARS-  
352 CoV-2 reinfection during periods of Alpha (B.1.1.7), Delta (B.1.617.2) or Omicron  
353 (B.1.1.529) dominance: A Danish nationwide study. *medRxiv.* Published online January 1,  
354 2022:2022.06.01.22275858. doi:10.1101/2022.06.01.22275858
- 355 22. Plumb I, Feldstein L, Barkley E, et al. Effectiveness of COVID-19 mRNA Vaccination in  
356 Preventing COVID-19–Associated Hospitalization Among Adults with Previous SARS-CoV-  
357 2 Infection — United States, June 2021–February 2022. *2022.* 71:549-555.



358 23. Shrestha NK, Shrestha P, Burke PC, Nowacki AS, Terpeluk P, Gordon SM. Coronavirus  
359 Disease 2019 Vaccine Boosting in Previously Infected or Vaccinated Individuals (COVID-  
360 19). *Clin Infect Dis*. Published online April 27, 2022:ciac327. doi:10.1093/cid/ciac327

361

362
